# Supplementary material
Source: PubMed Central journal article supplement (PMC6885121)

# pgc\_scz\_asia\_ASNstage12.0.chr1

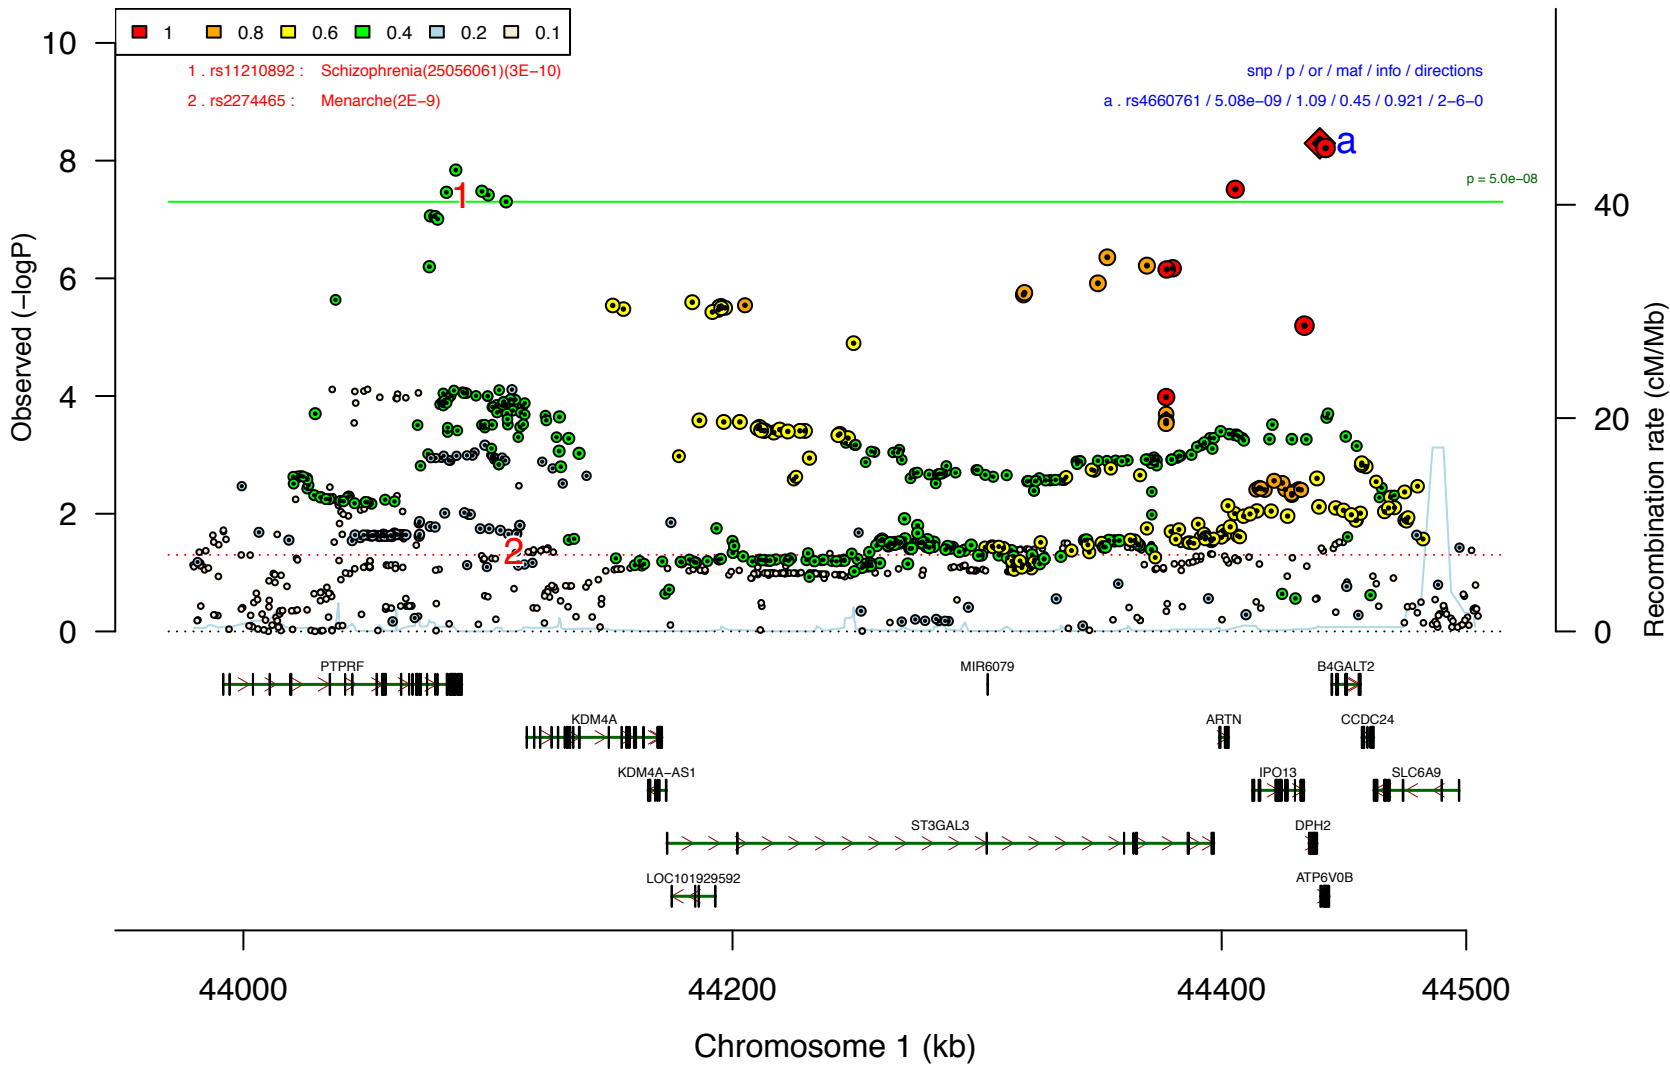

# pgc\_scz\_asia ASNstage12.1.chr2

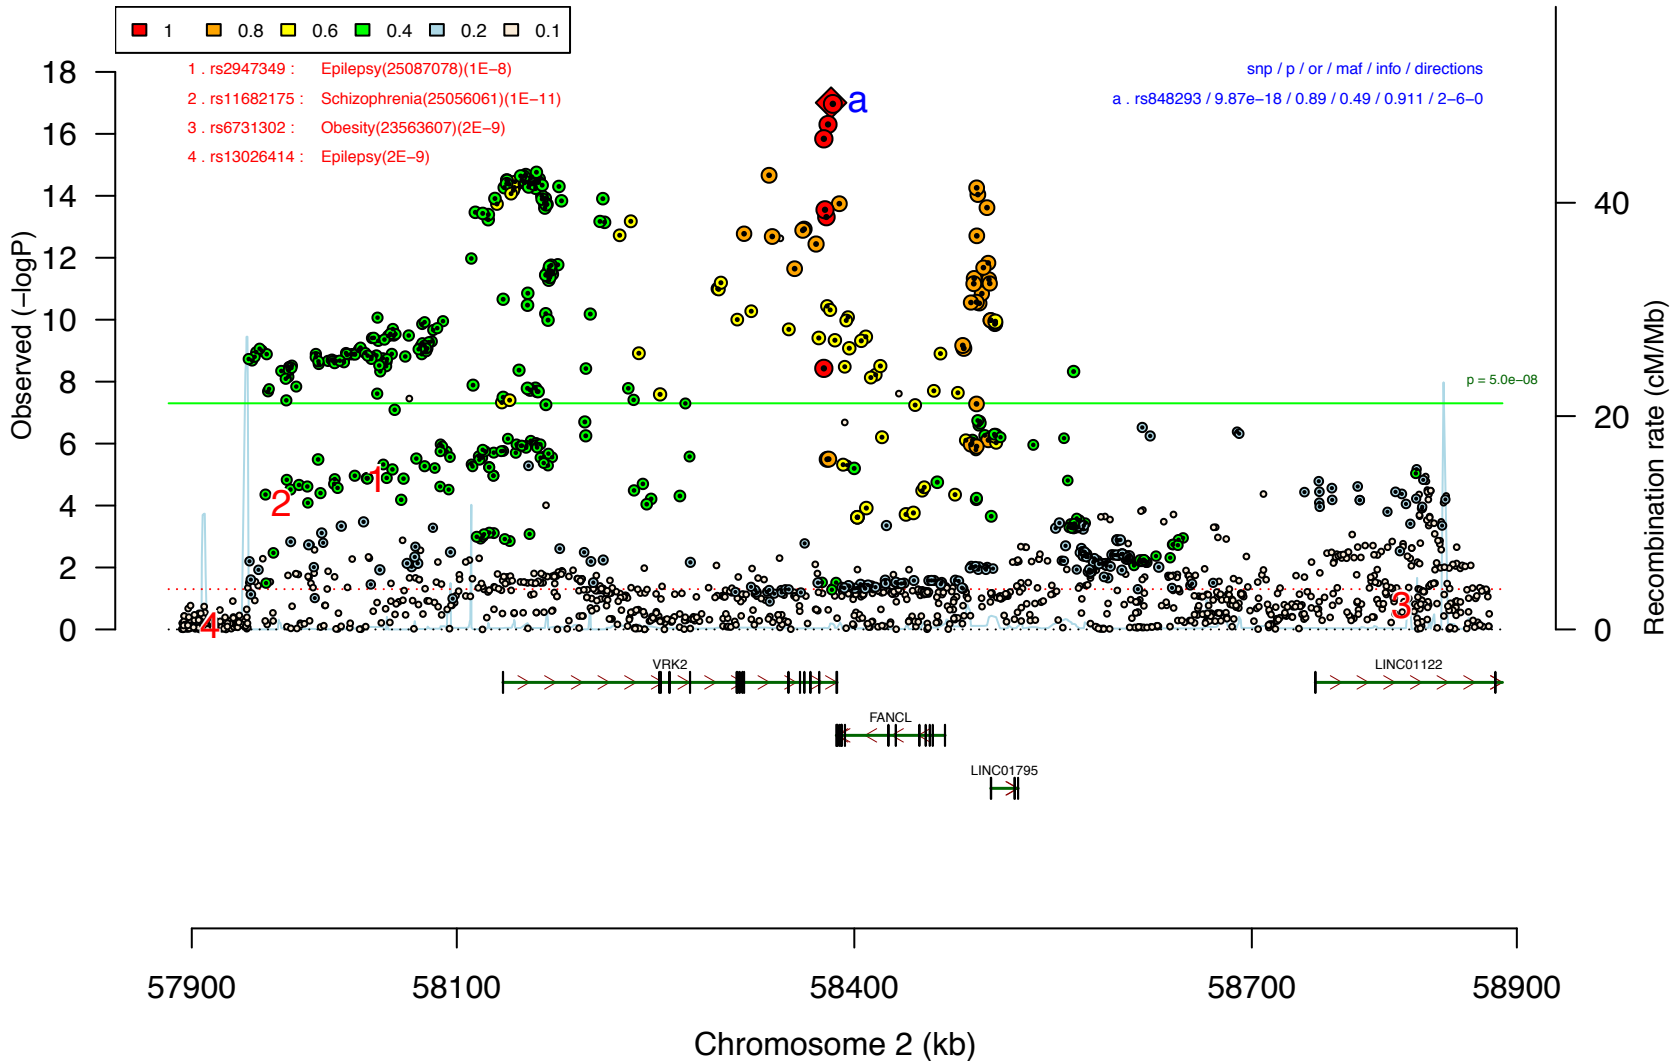

# pgc\_scz\_asia\_ASNstage12.2.chr2

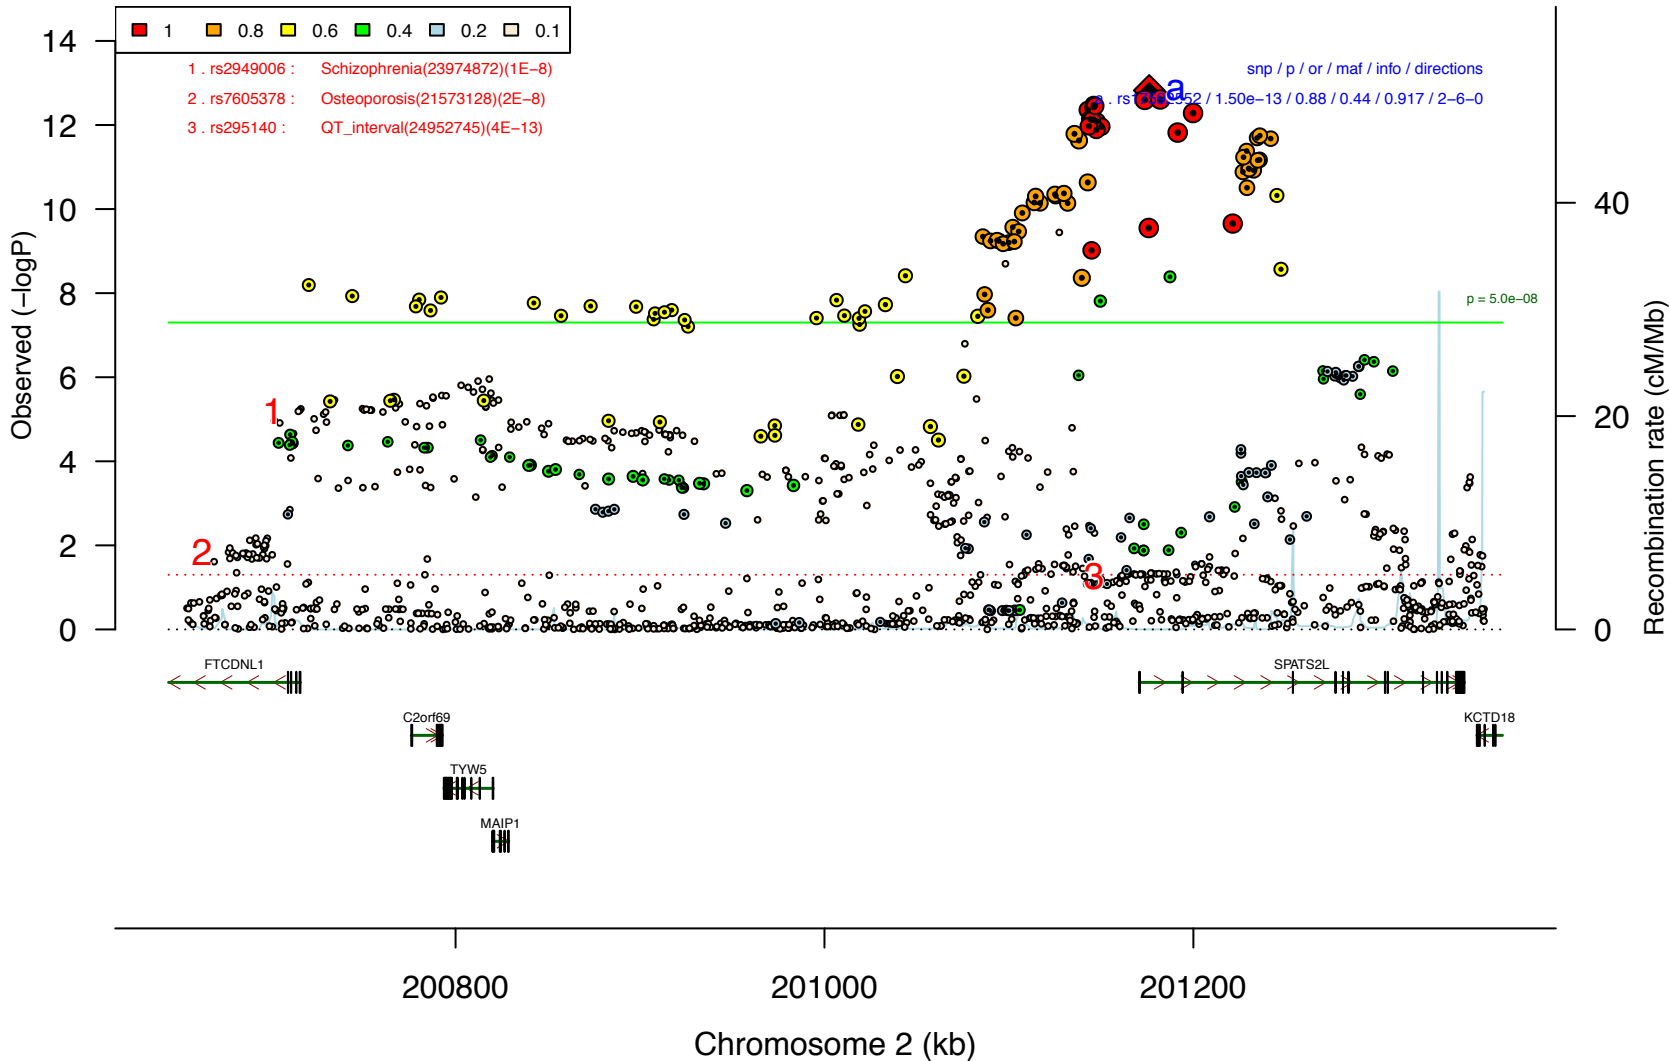

# pgc\_scz\_asia\_ASNstage12.3.chr3

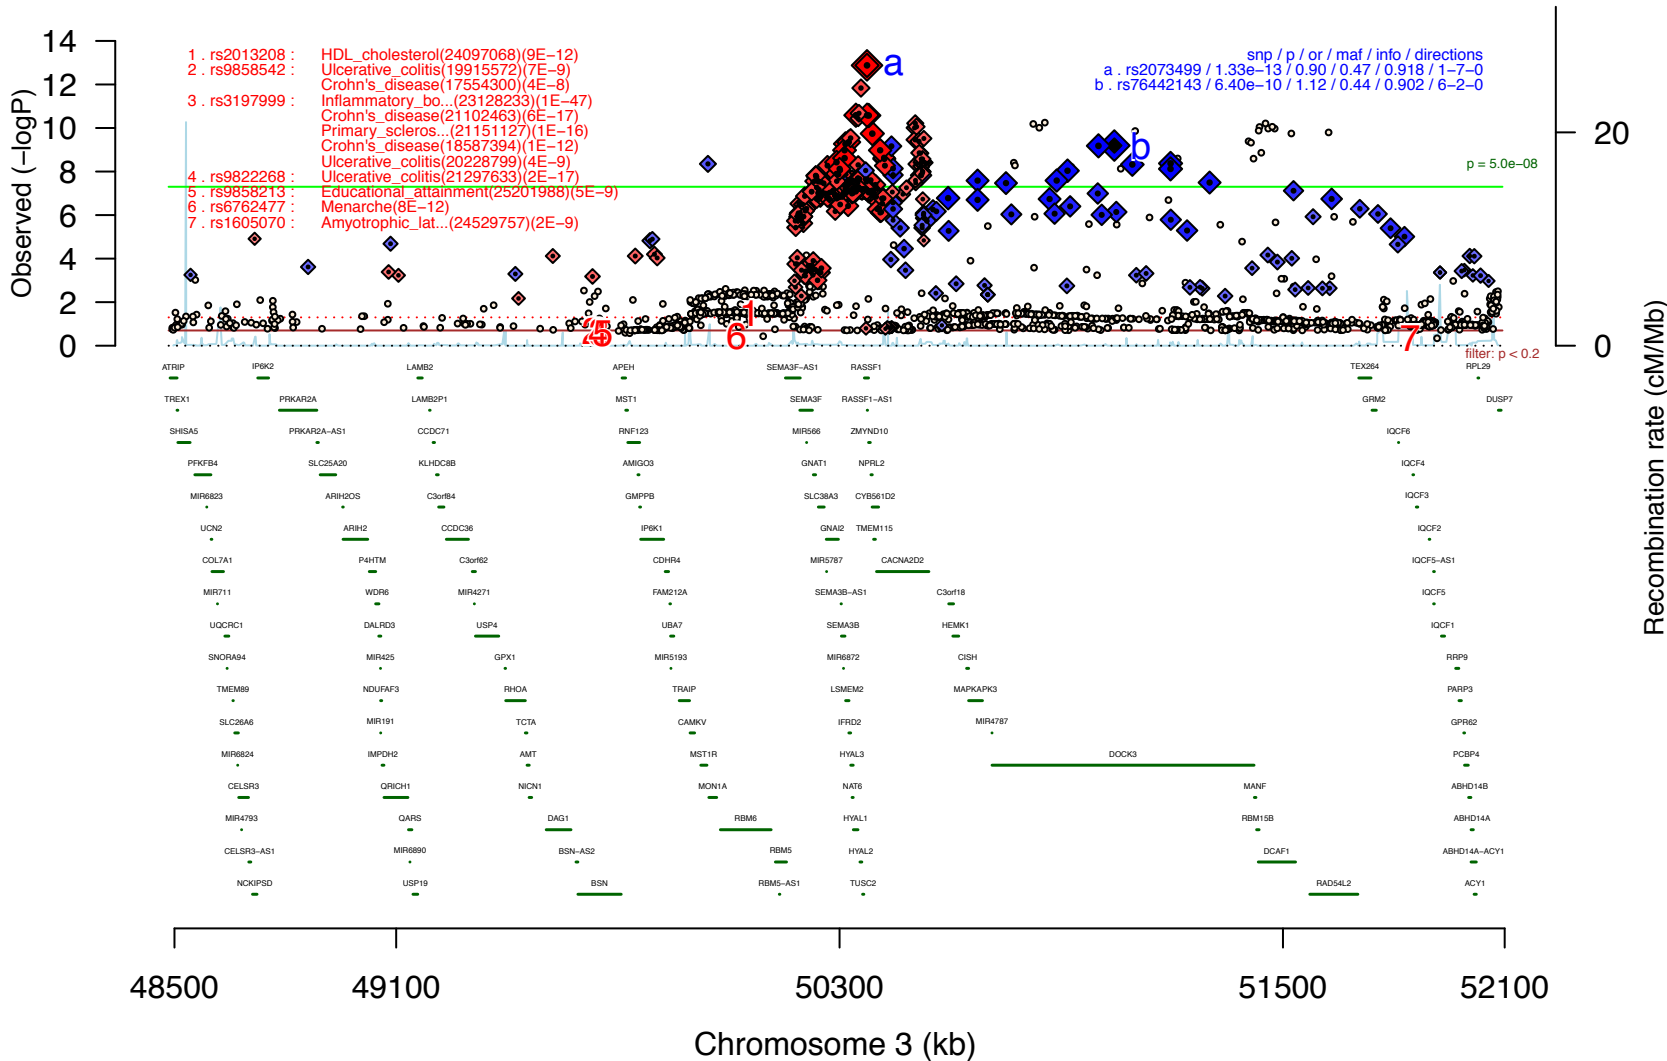

# pgc\_scz\_asia ASNstage12.4.chr3

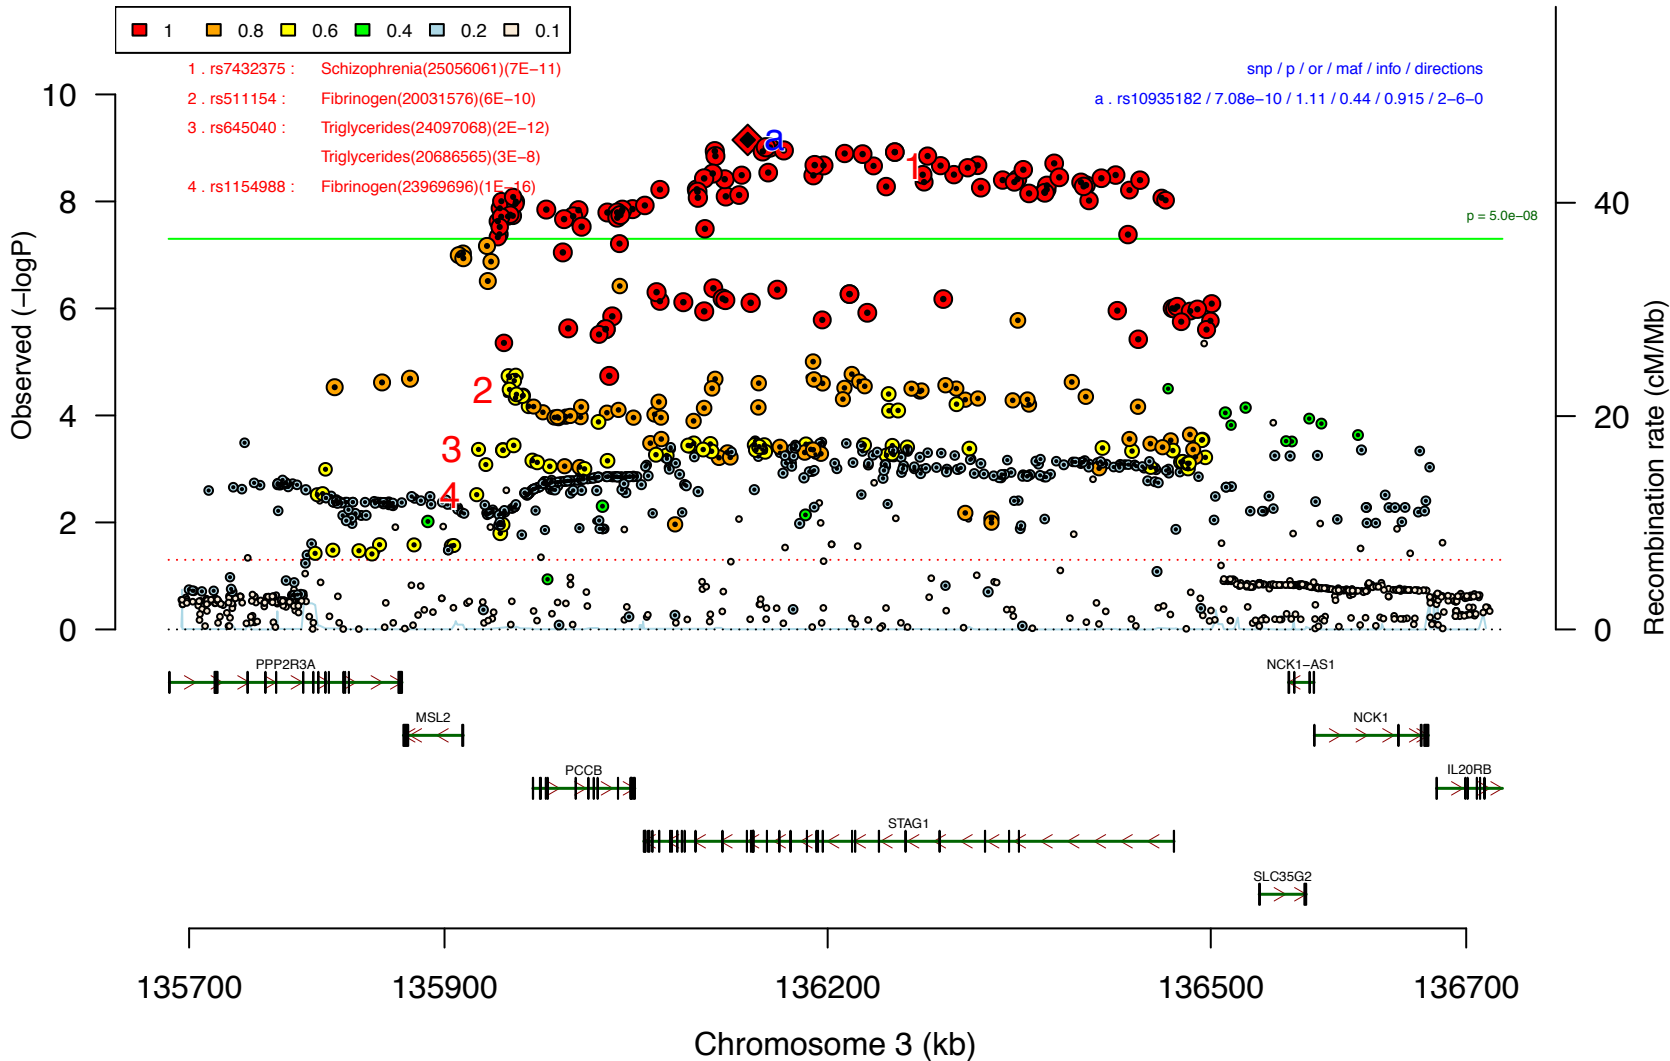

# pgc\_scz\_asia\_ASNstage12.5.chr3

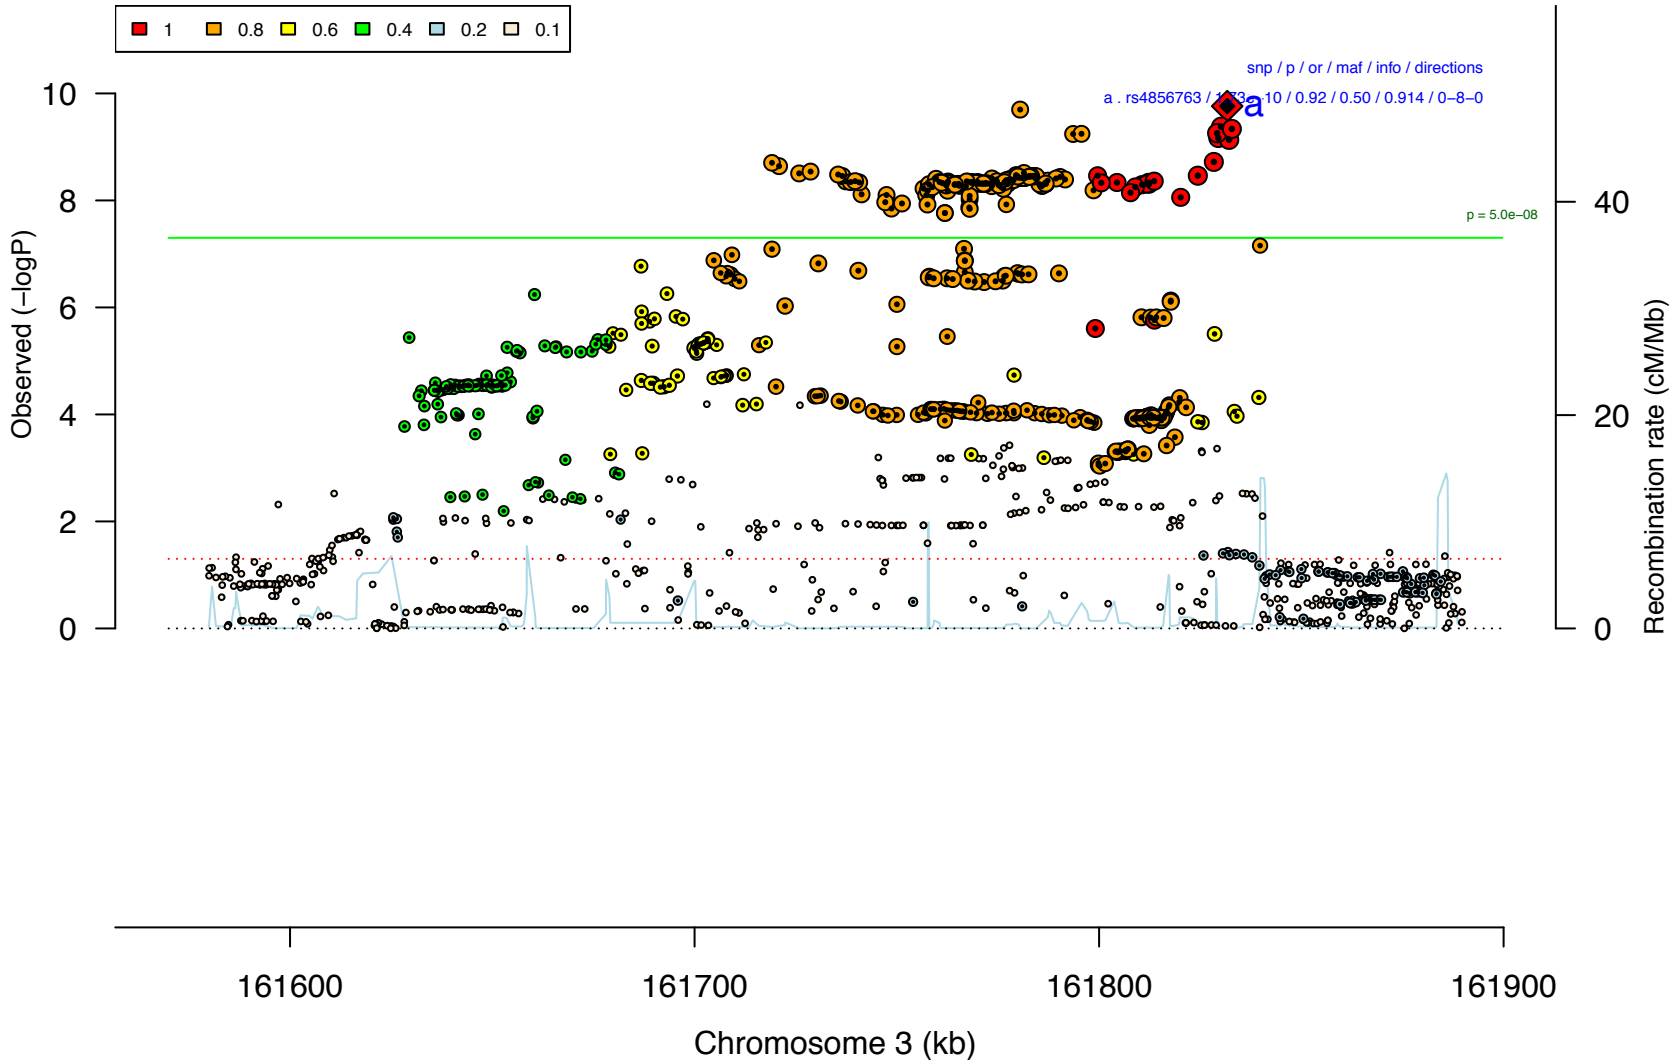

# pgc\_scz\_asia ASNstage12.6.chr3

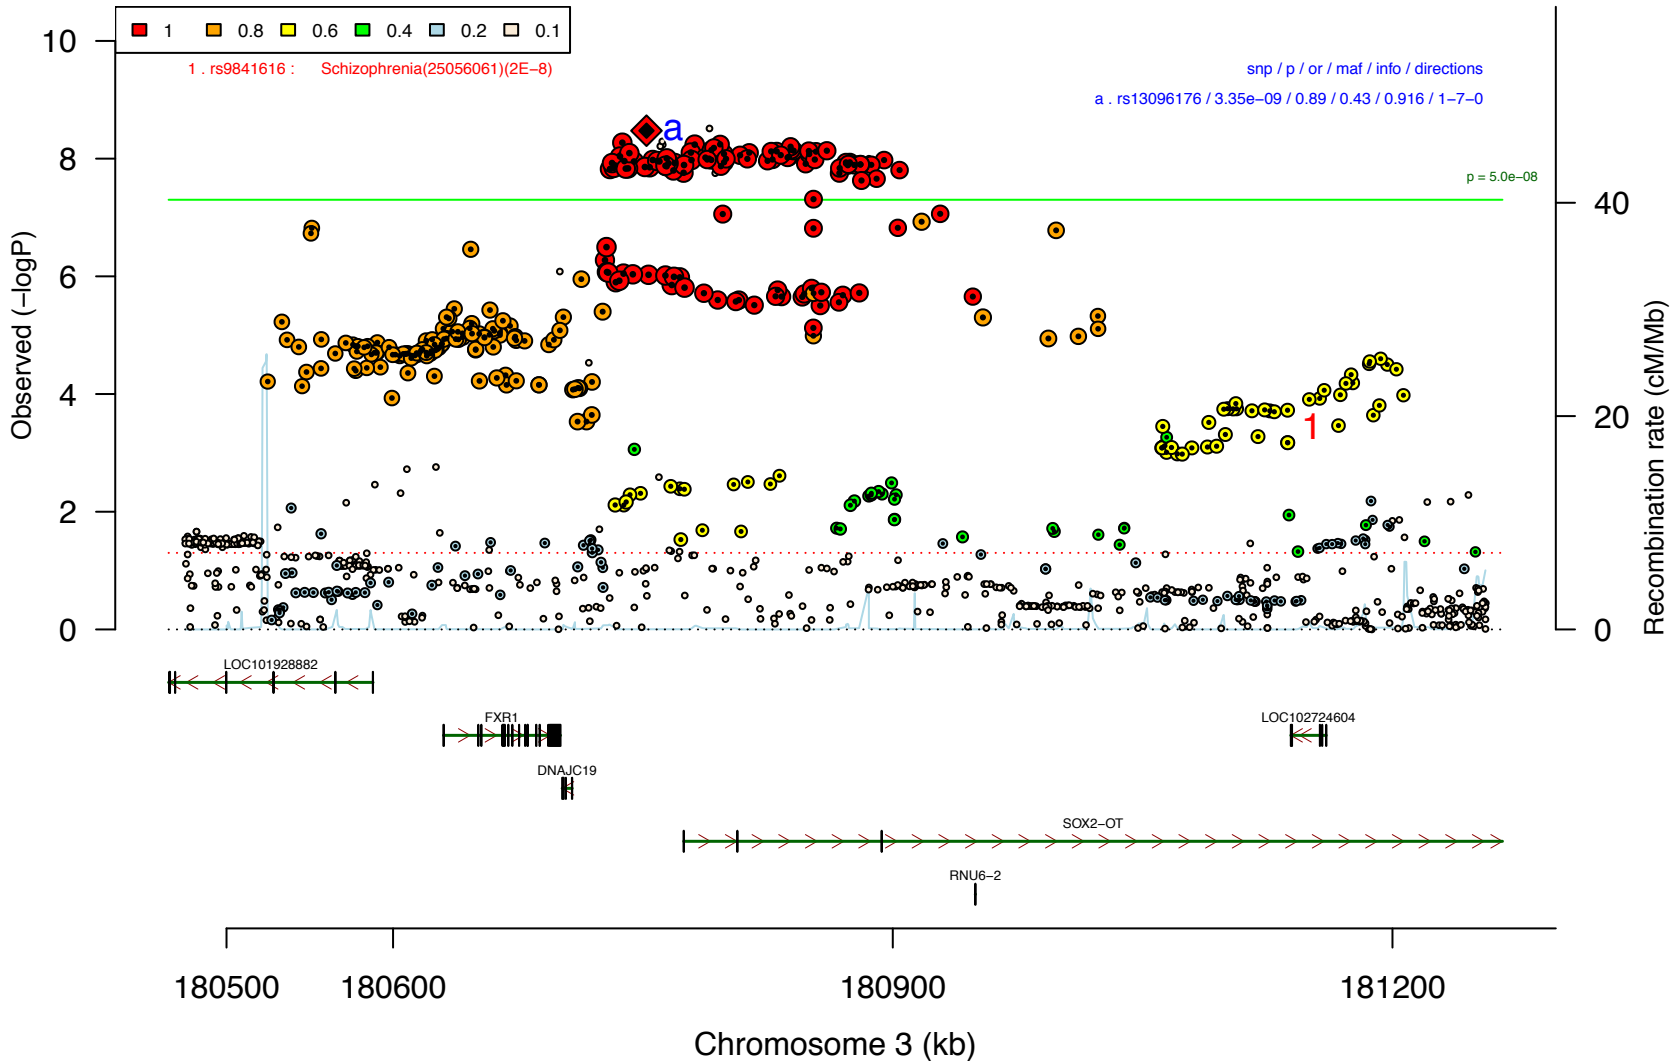

# pgc\_scz\_asia\_ASNstage12.7.chr4

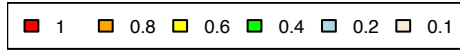

snp / p / or / maf / info / directions  
a . rs6832165 / 2.79e-08 / 0.89 / 0.23 / 0.988 / 4-0-4

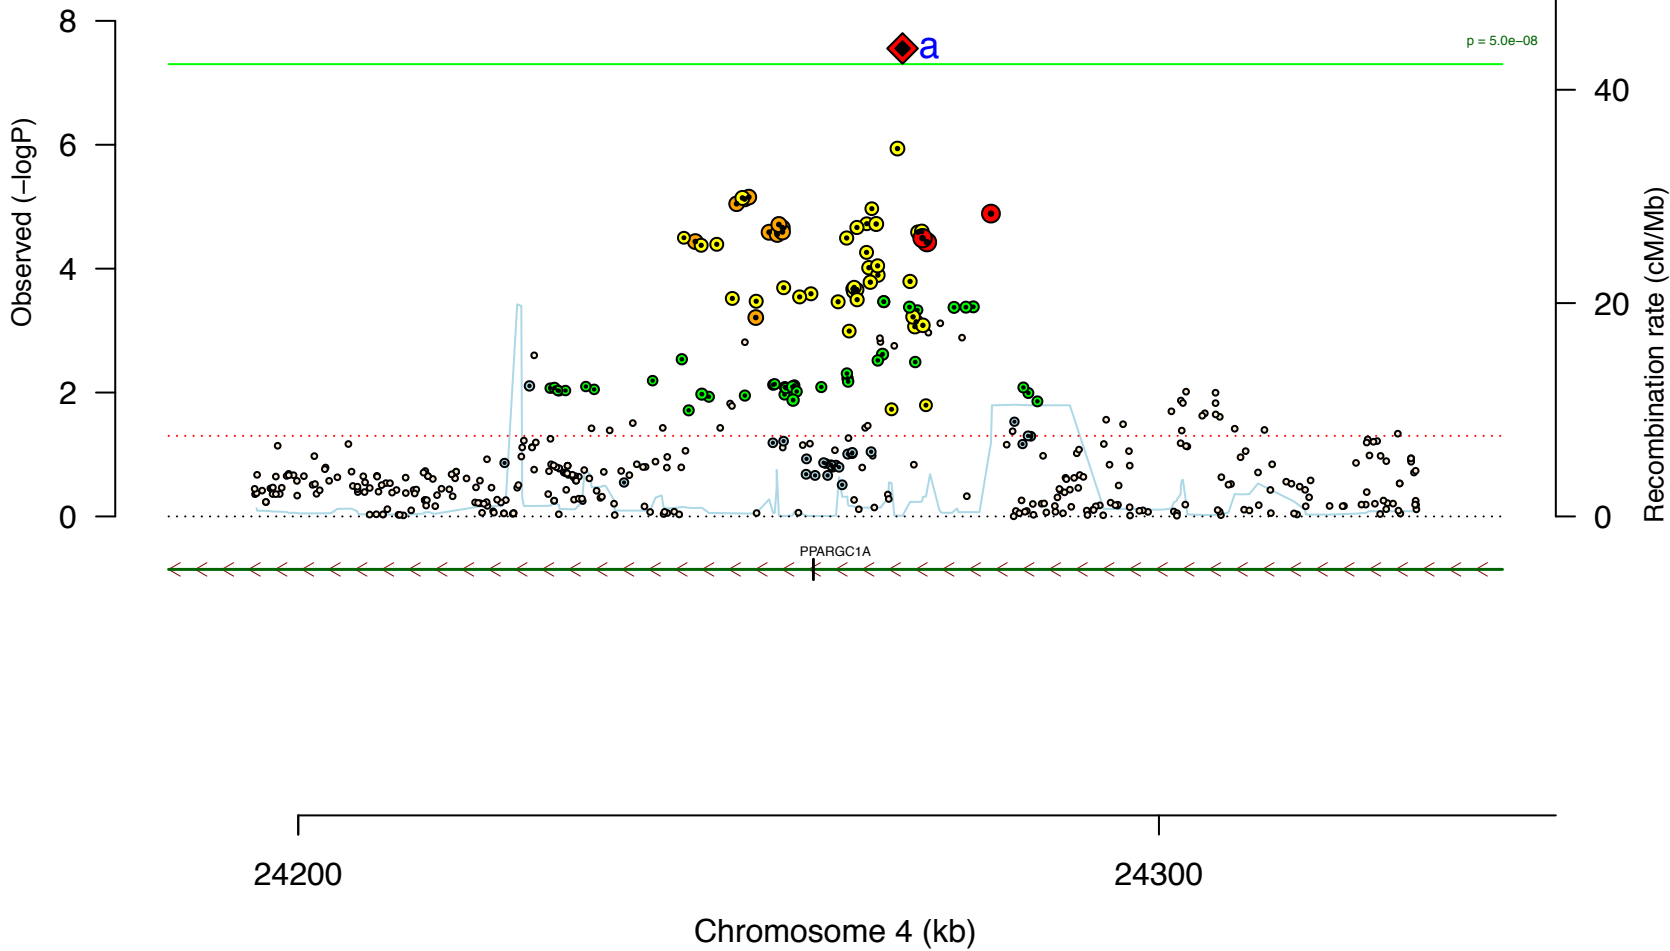



# pgc\_scz\_asia\_ASNstage12.8.chr4

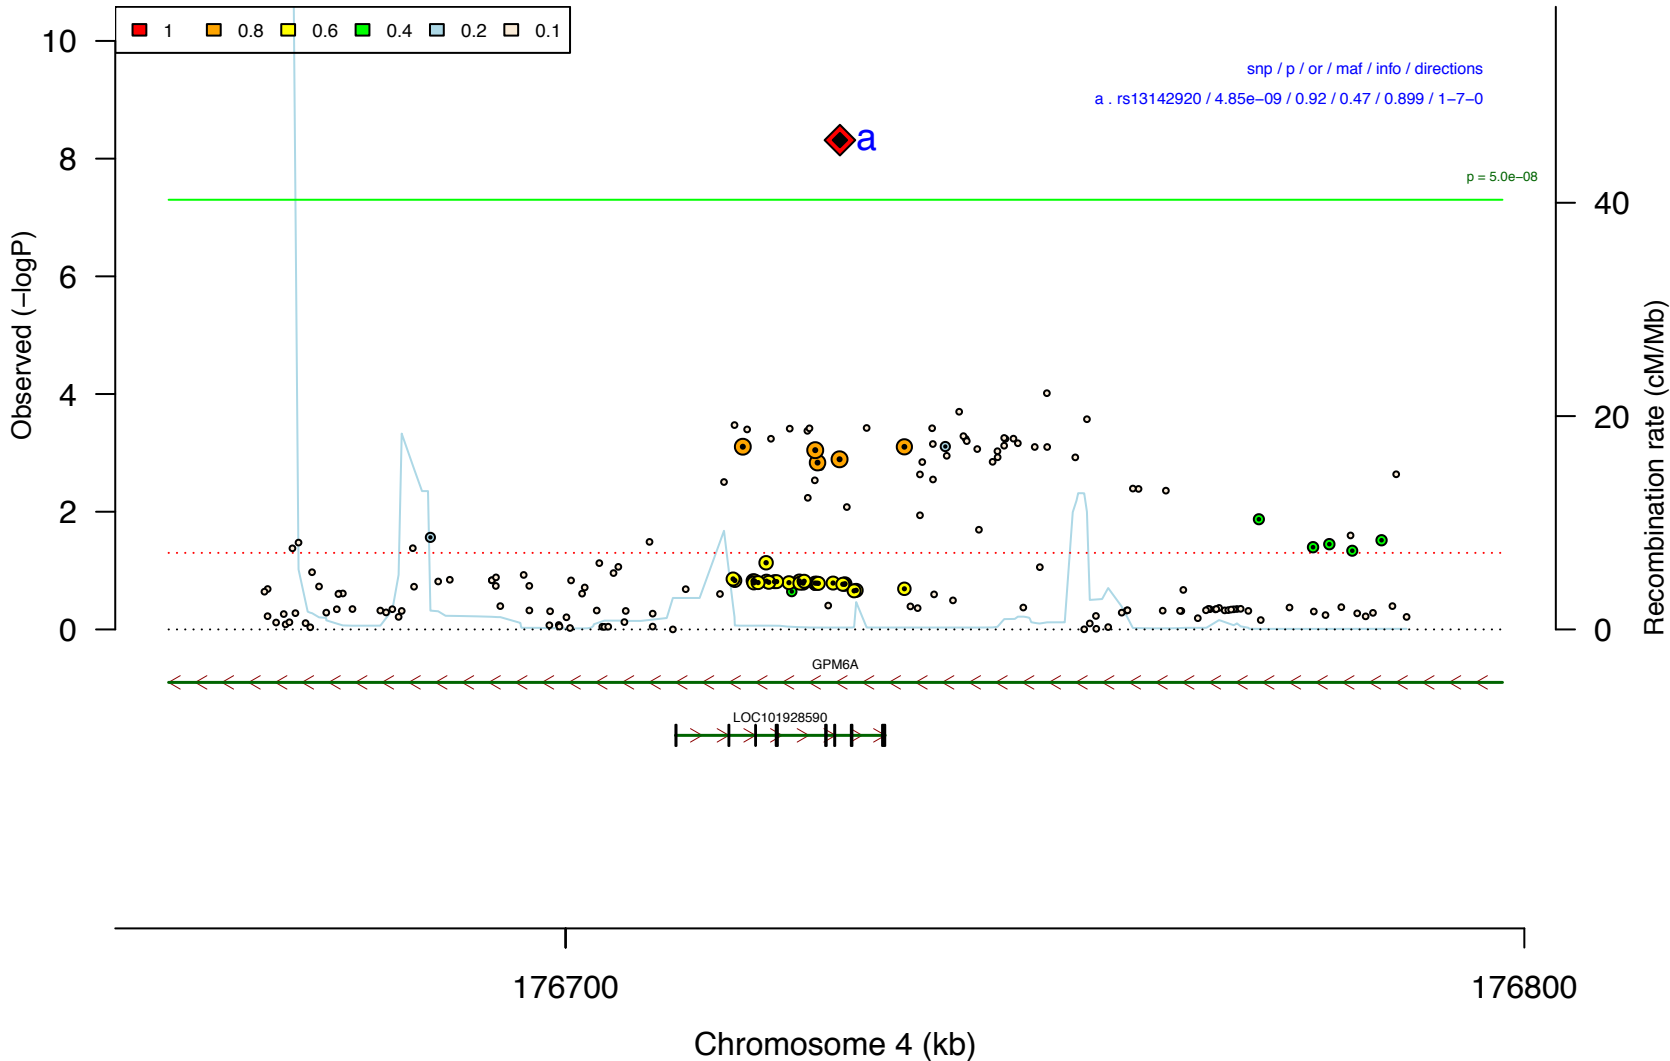

# pgc\_scz\_asia\_ASNstage12.9.chr6

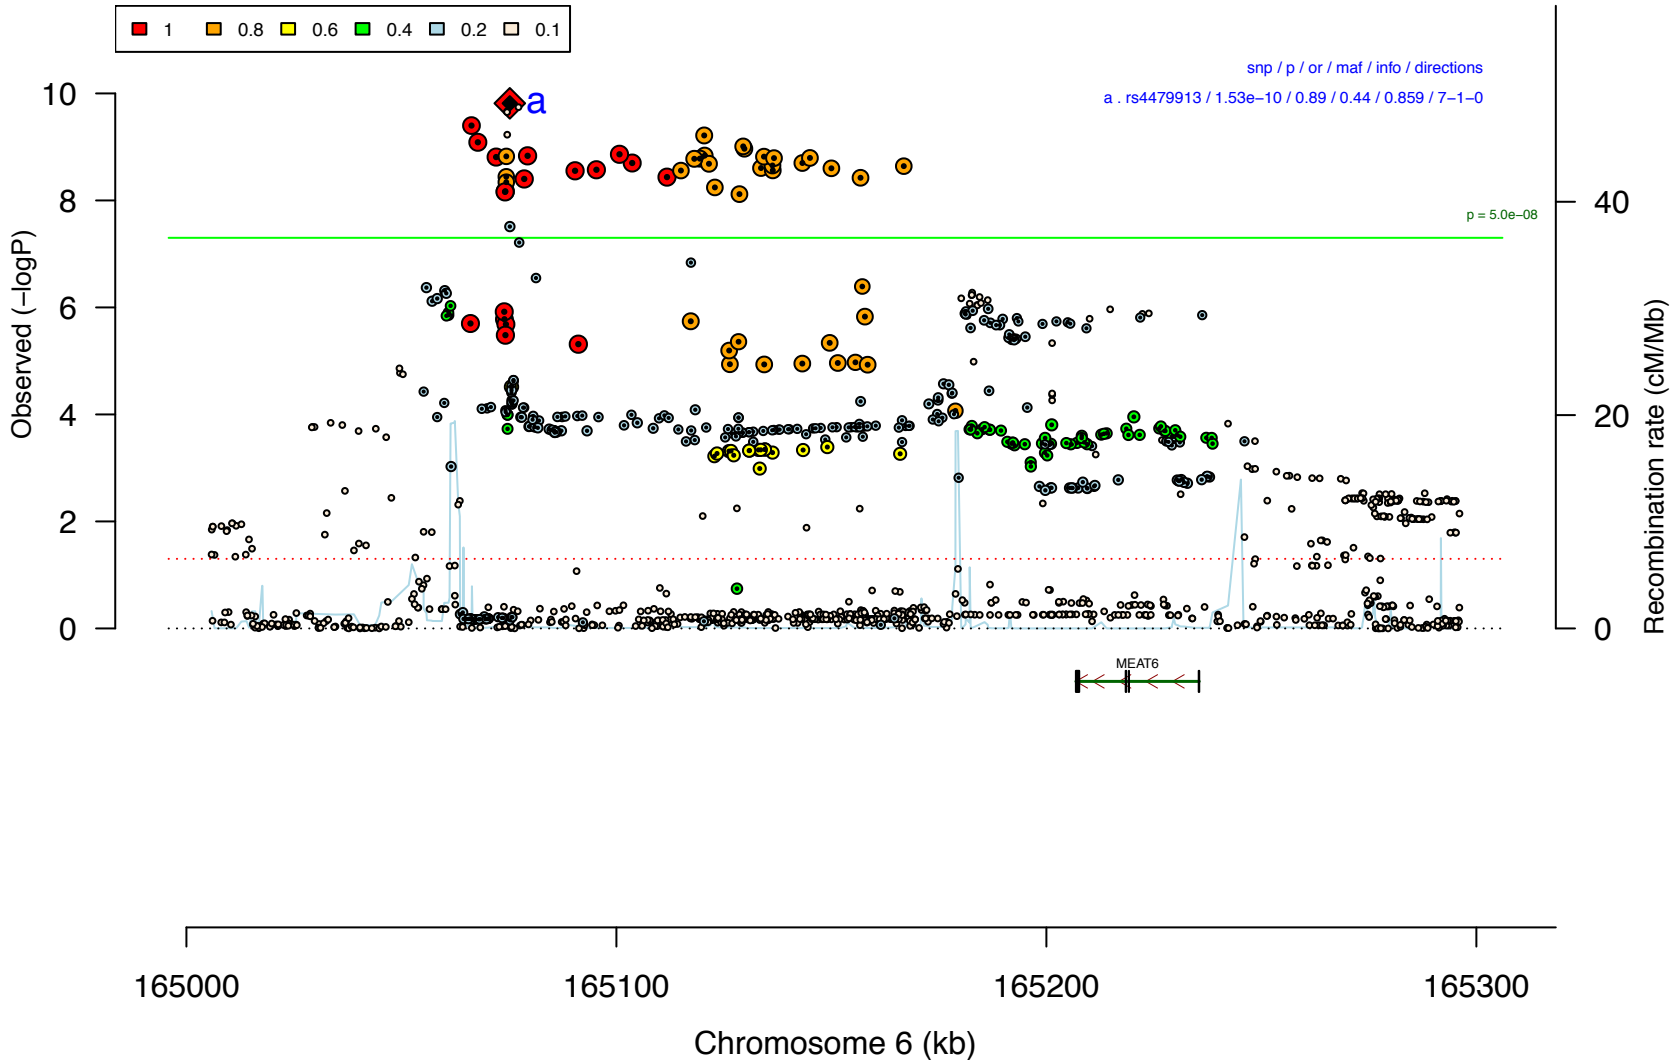

# pgc\_scz\_asia ASNstage12.10.chr7

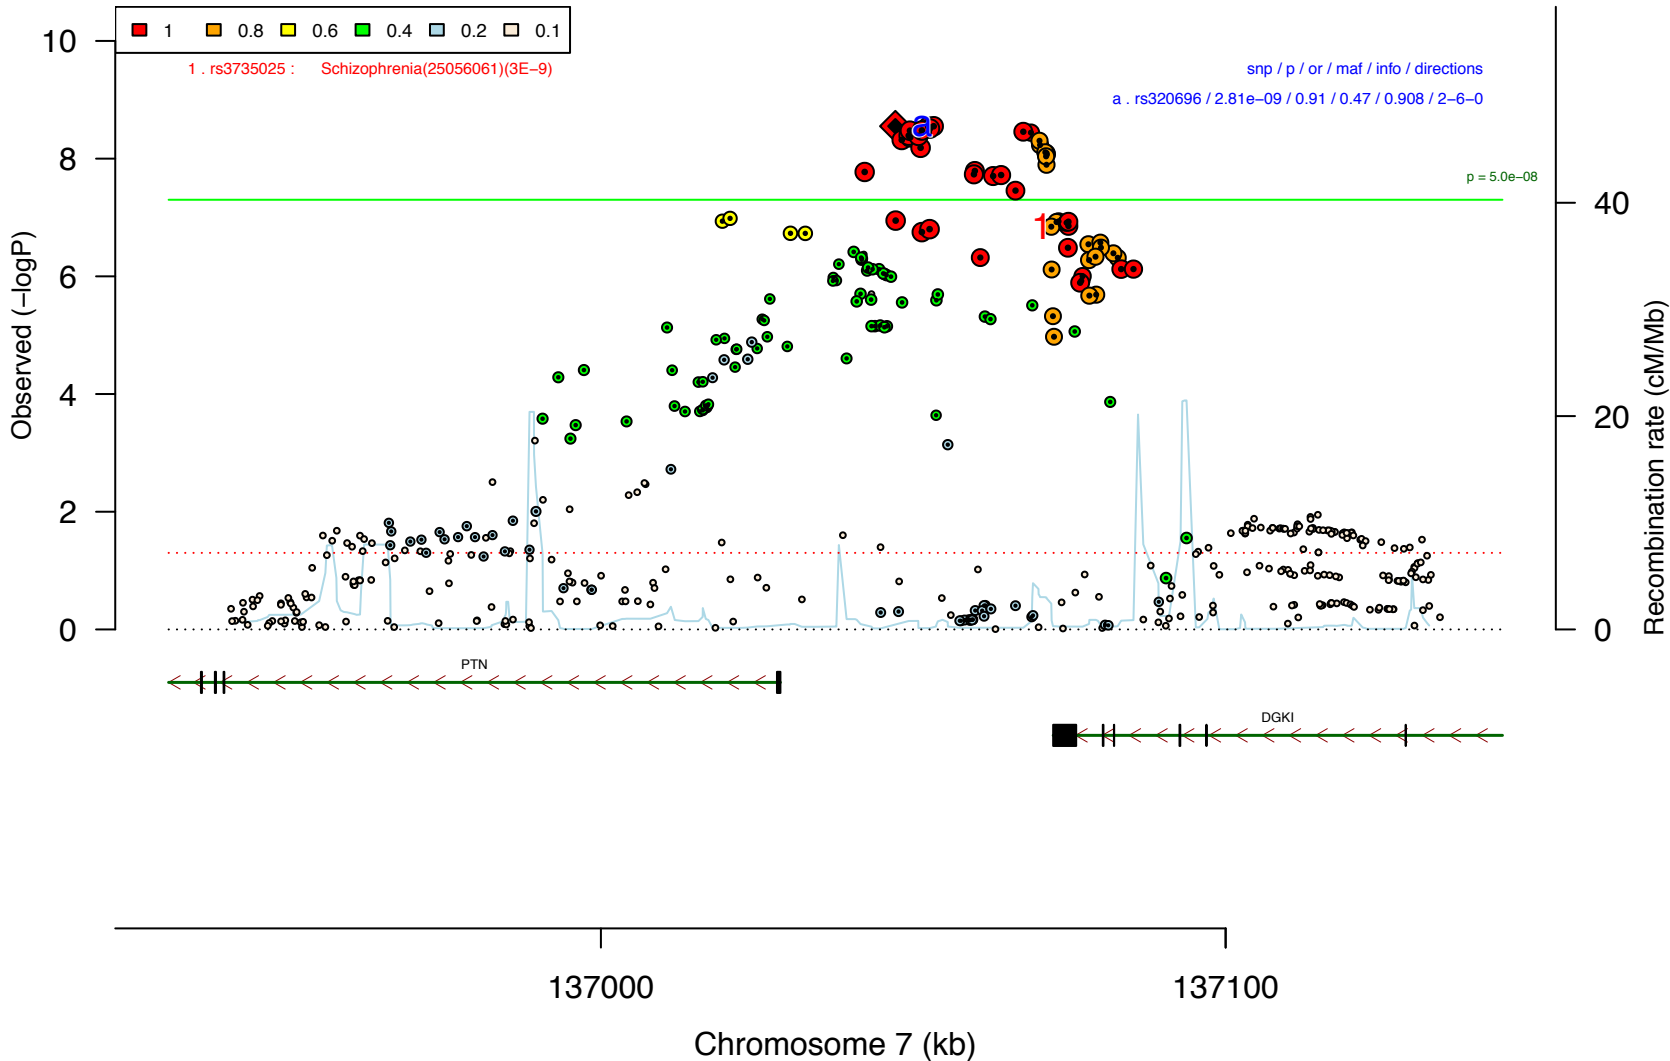

# pgc\_scz\_asia\_ASNstage12.11.chr8

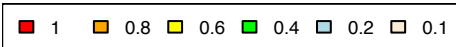

1 .rs16887244 : Schizophrenia(22037555)(1E-10)  
 2 .rs2517388 : Menopause(9E-15)

snp / p / or / maf / info / directions  
 a .rs11986274 / 1.44e-08 / 0.92 / 0.47 / 0.912 / 7-1-0

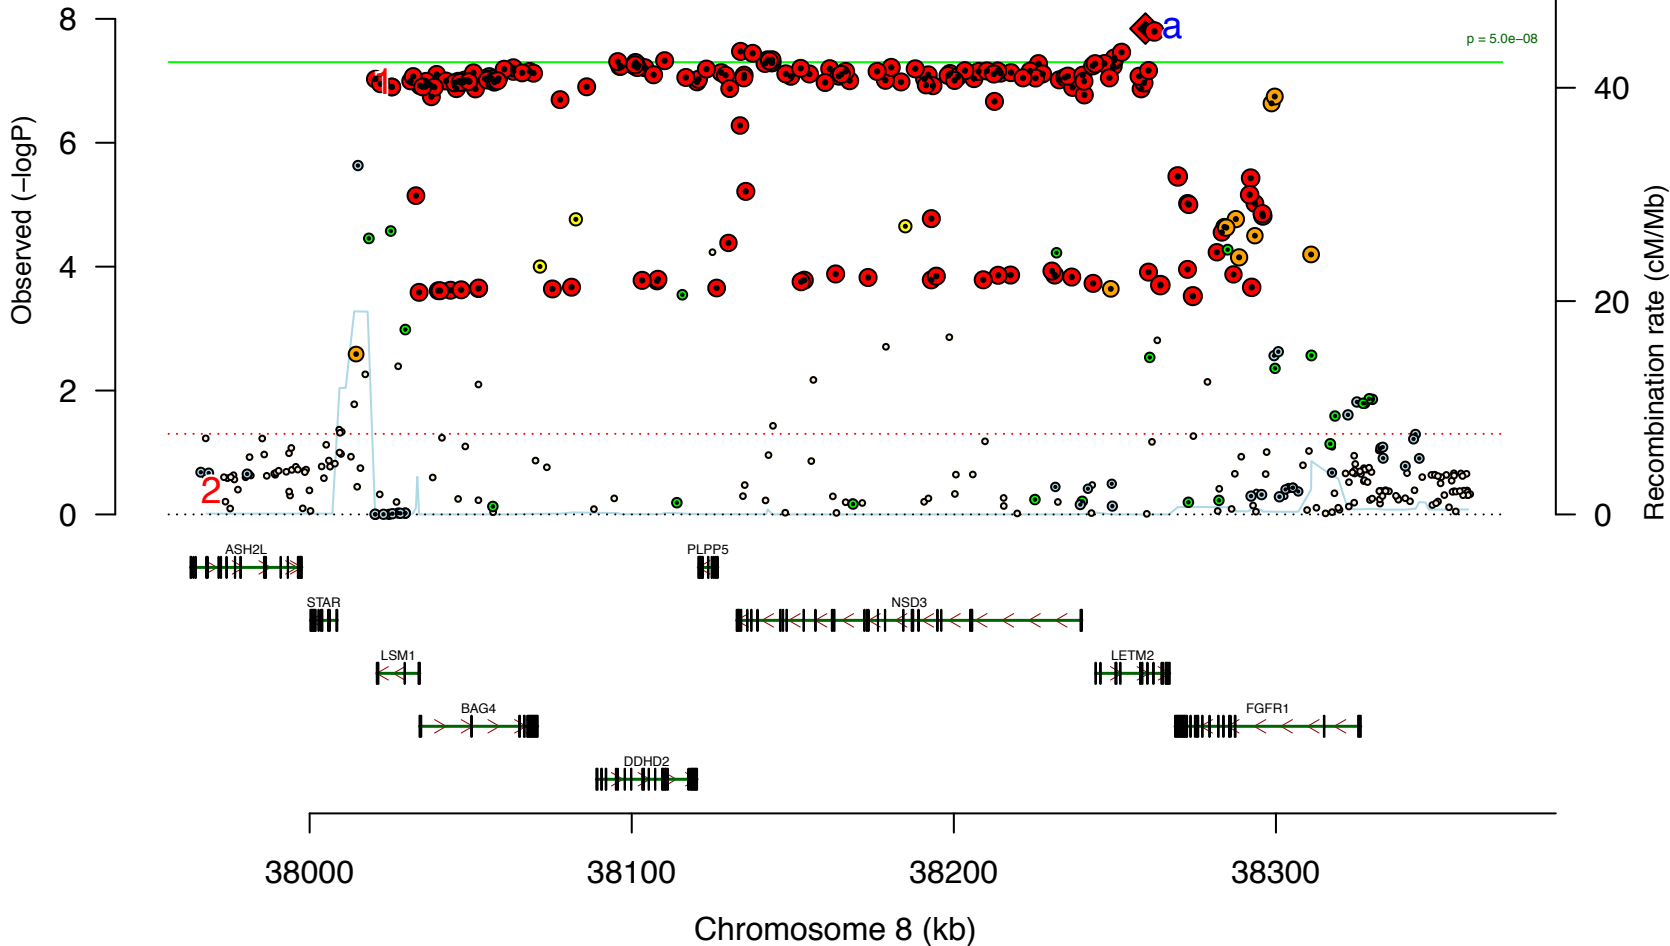

# pgc\_scz\_asia\_ASNstage12.chr8

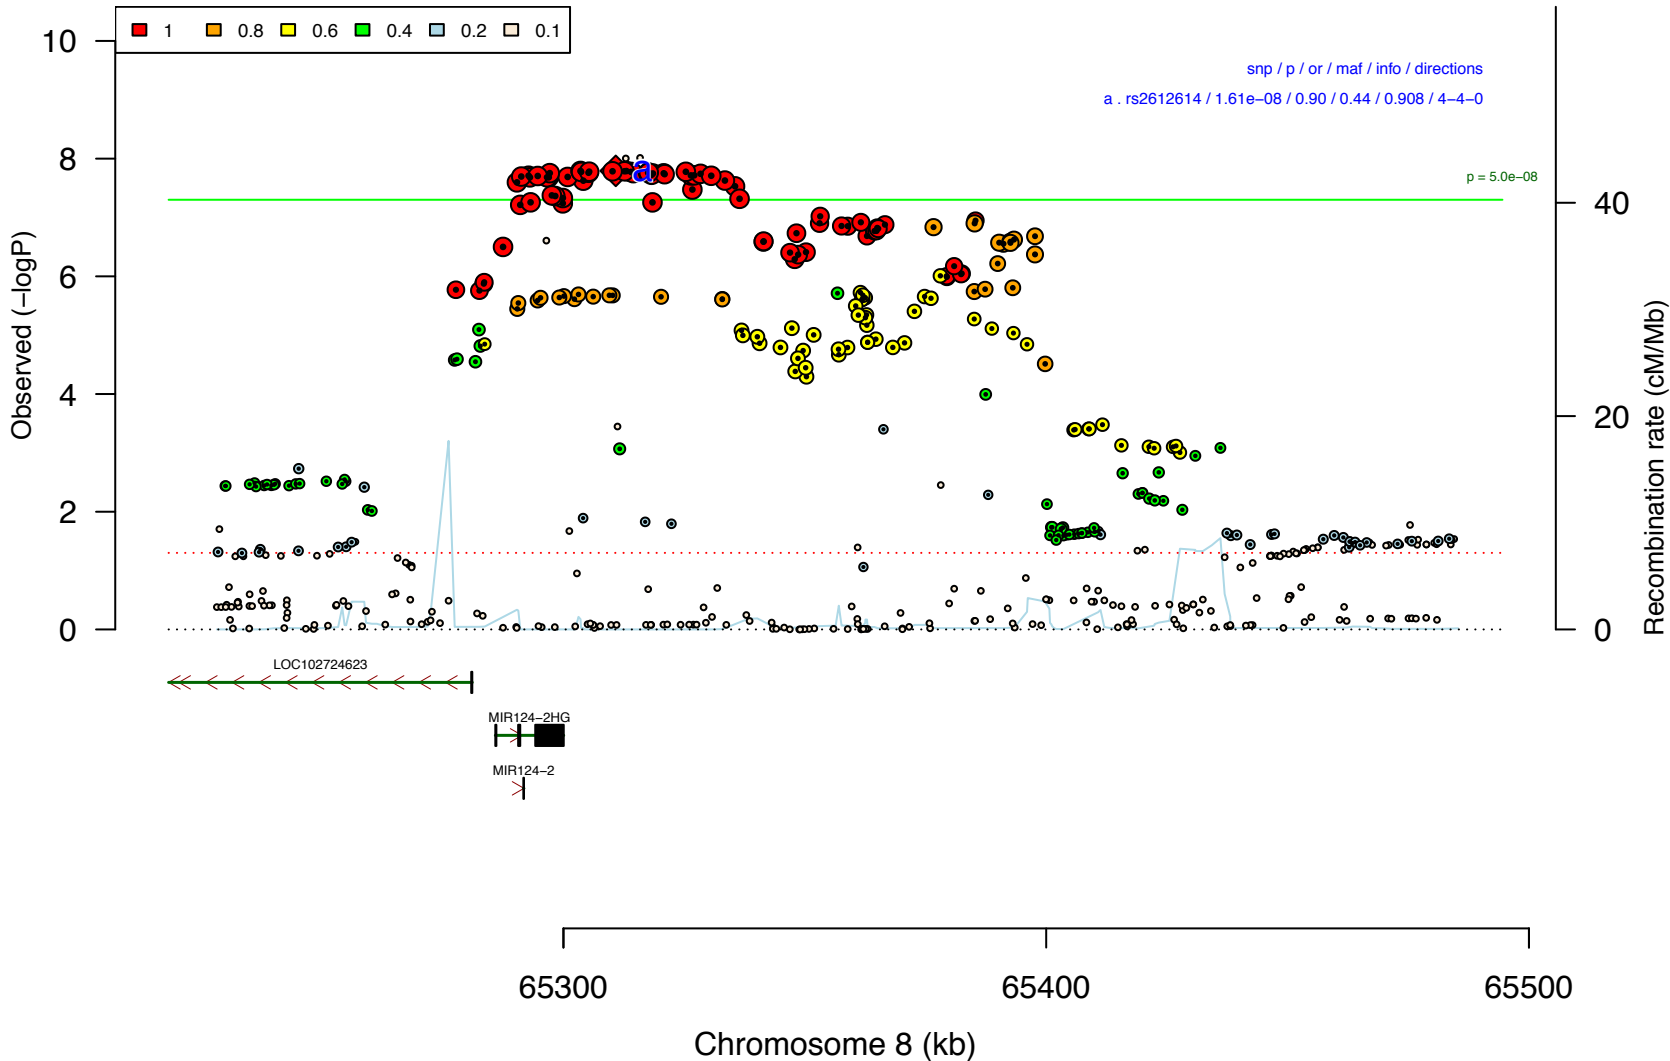

# pgc\_scz\_asia\_ASNstage12.13.chr10

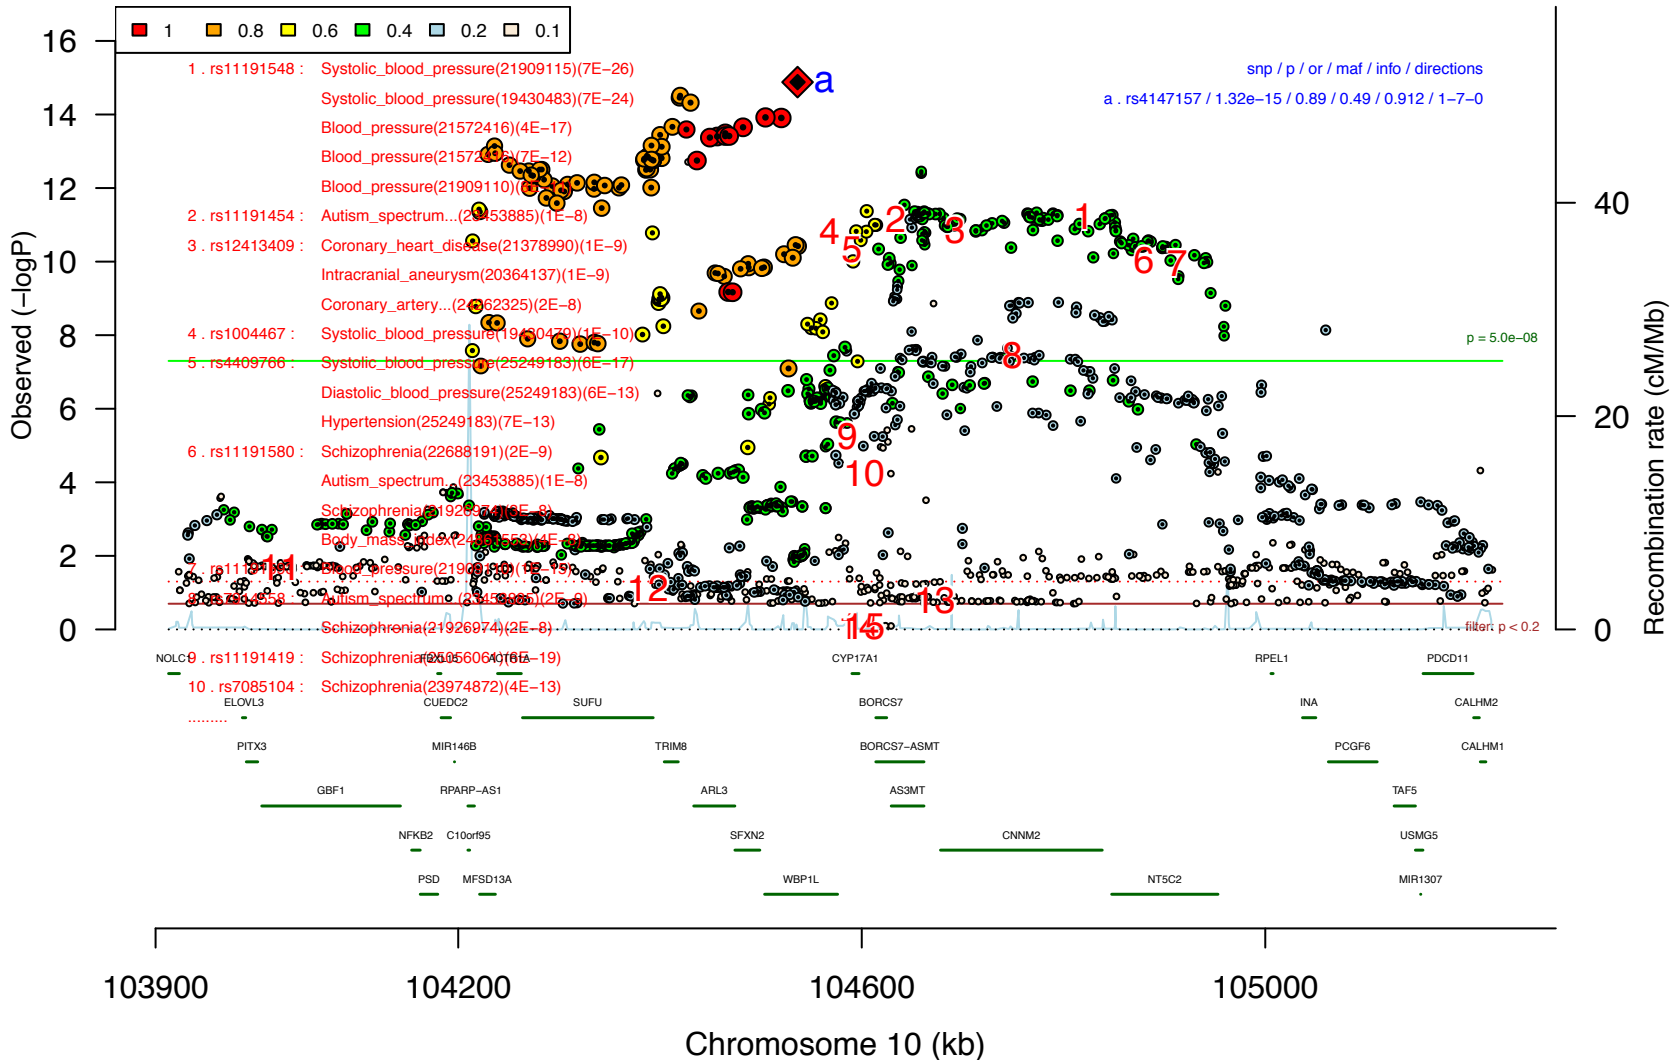

# pgc\_scz\_asia\_ASNstage12.14.chr12

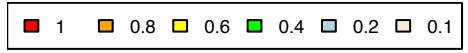

snp / p / or / maf / info / directions  
a . rs10861879 / 1.18e-08 / 0.92 / 0.49 / 0.903 / 8-0-0

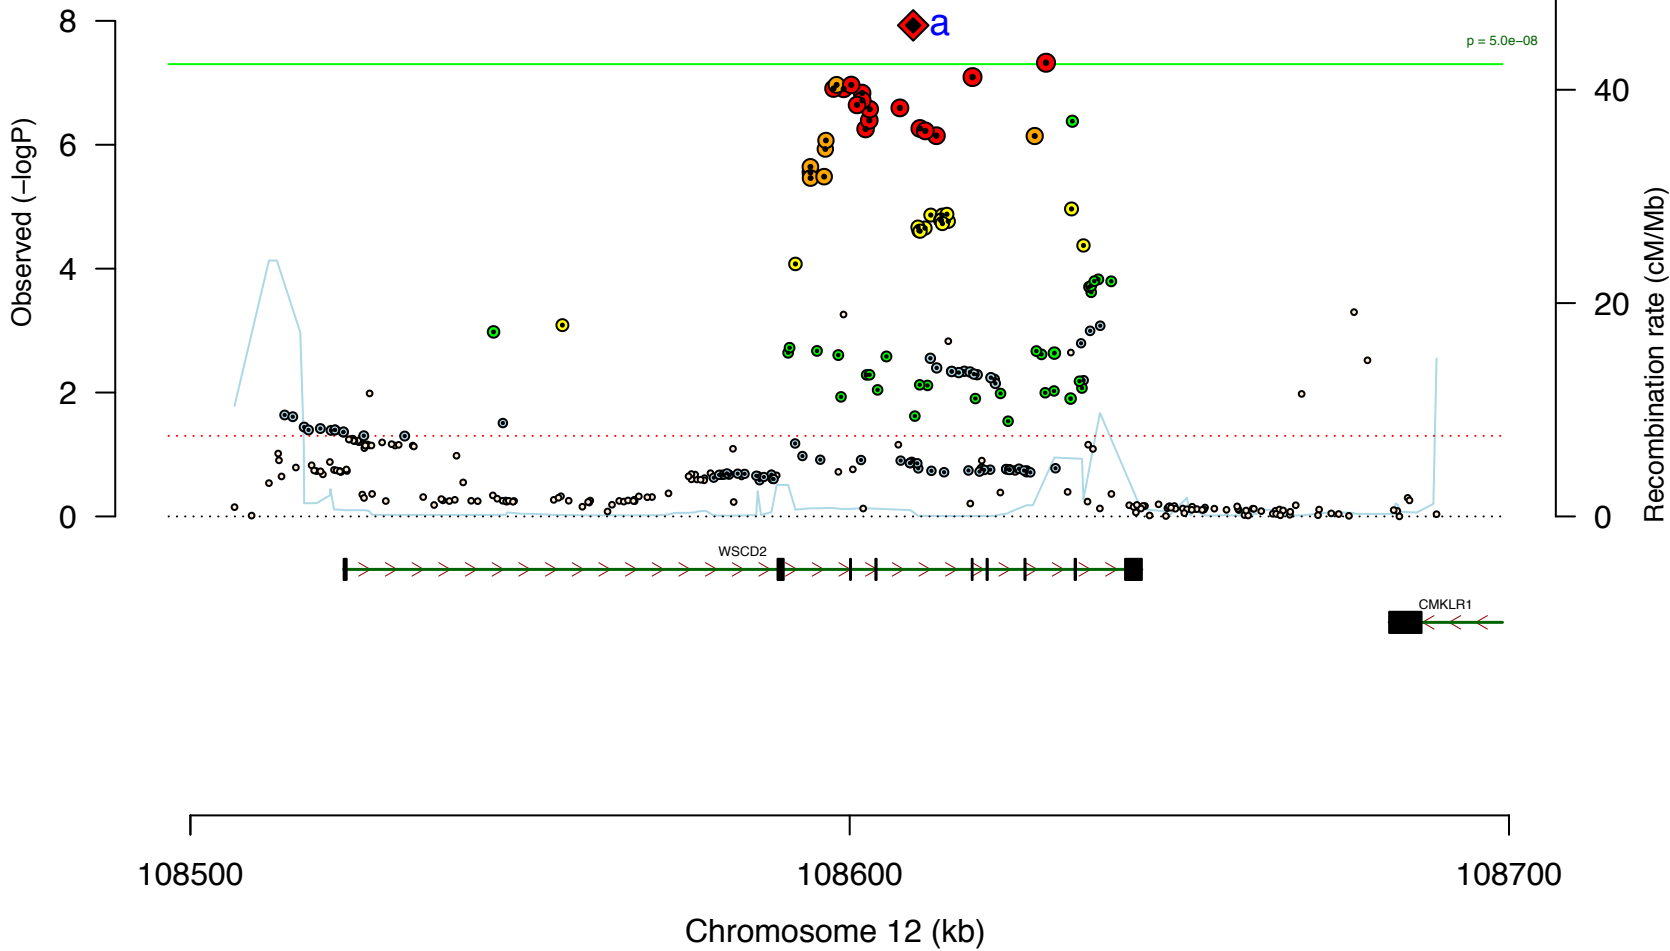

# pgc\_scz\_asia\_ASNstage12.15.chr12

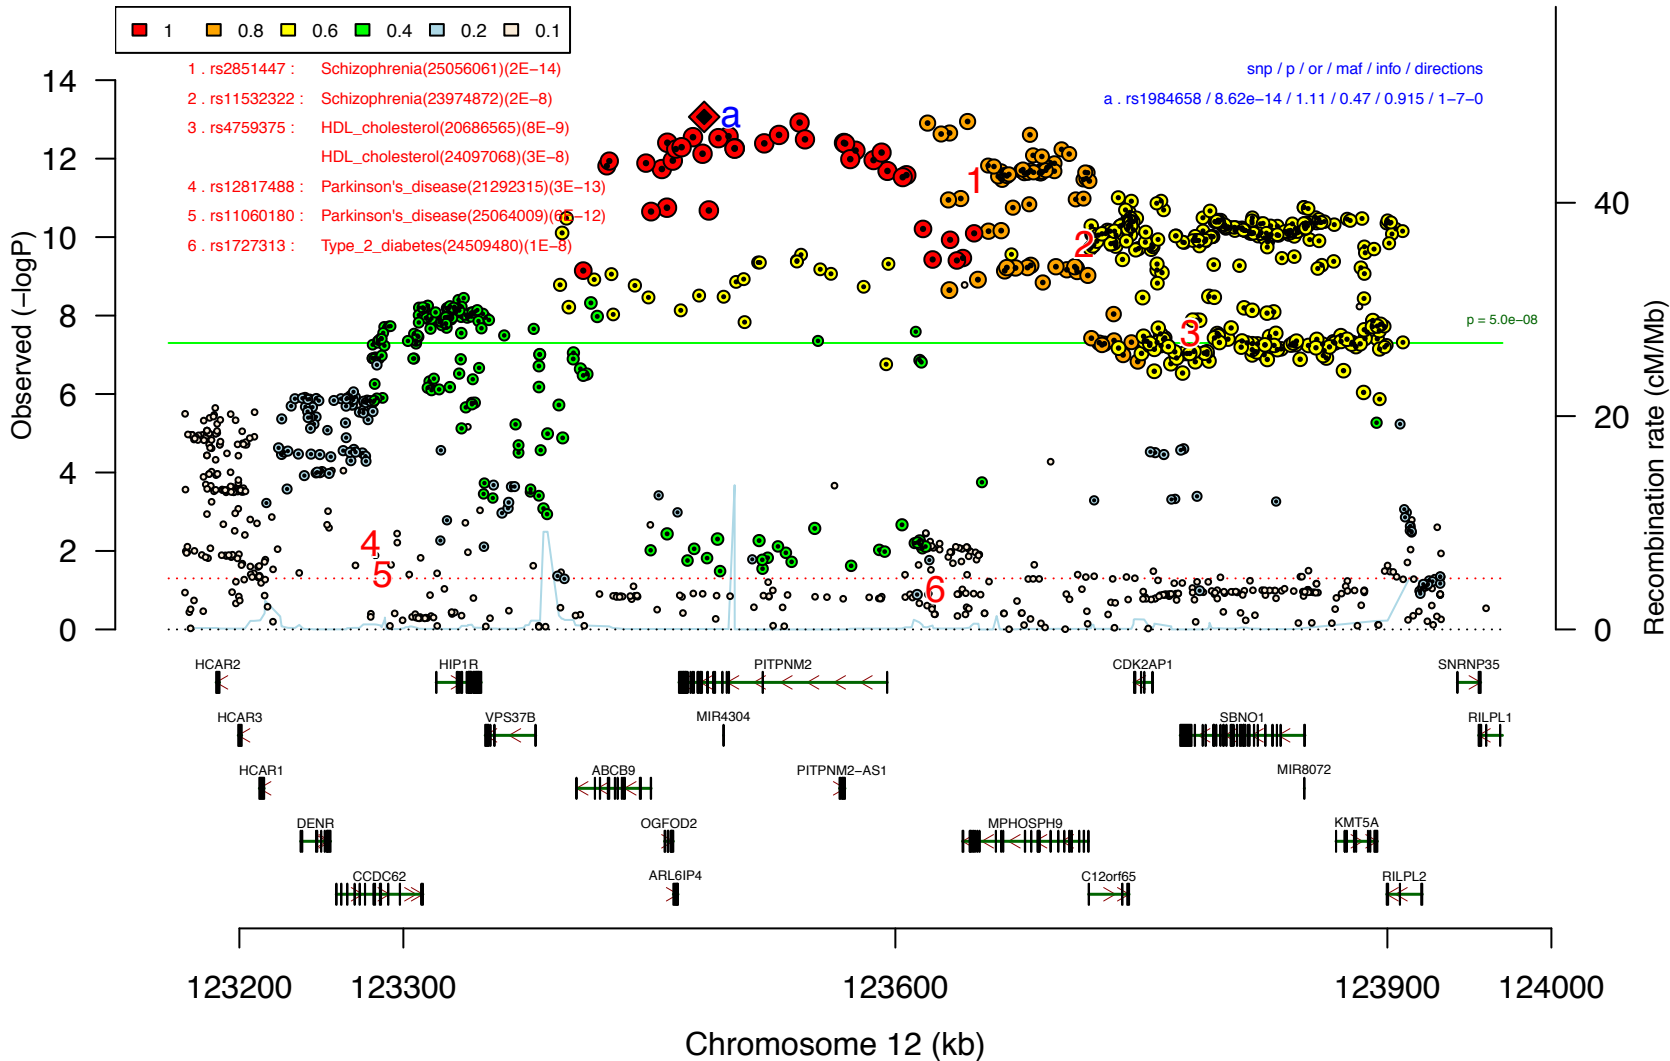



# pgc\_scz\_asia\_ASNstage12.16.chr13

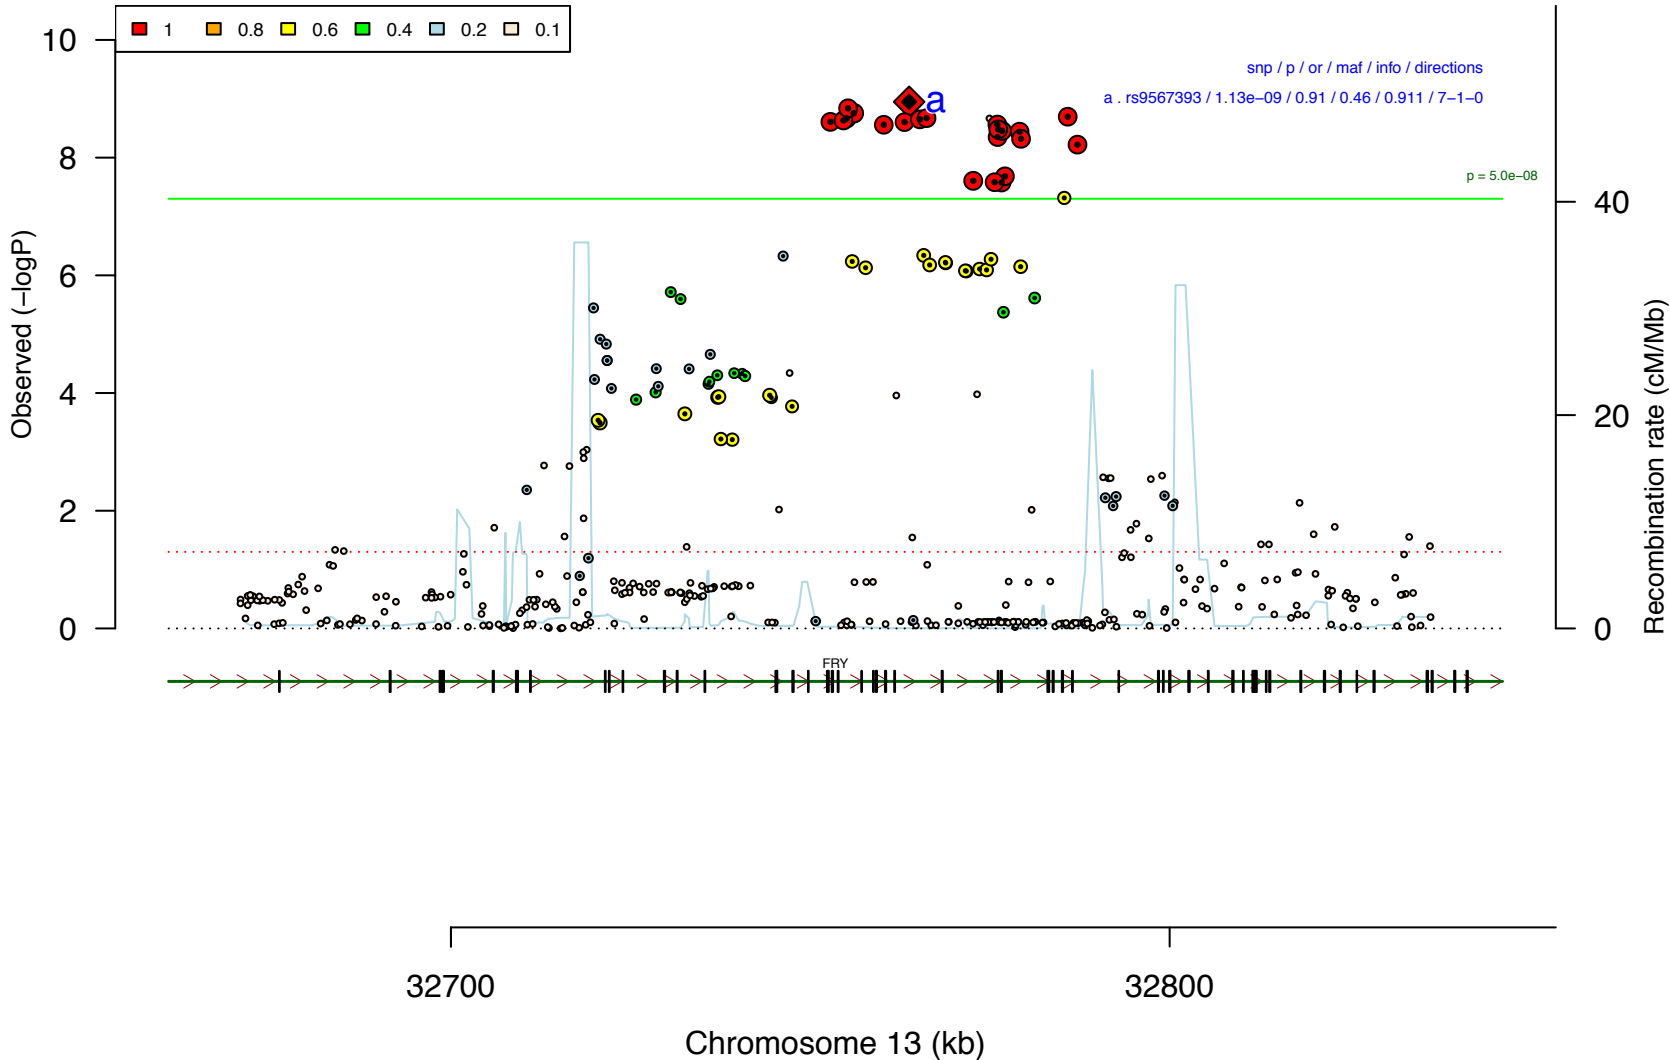

# pgc\_scz\_asia ASNstage12.17.chr17

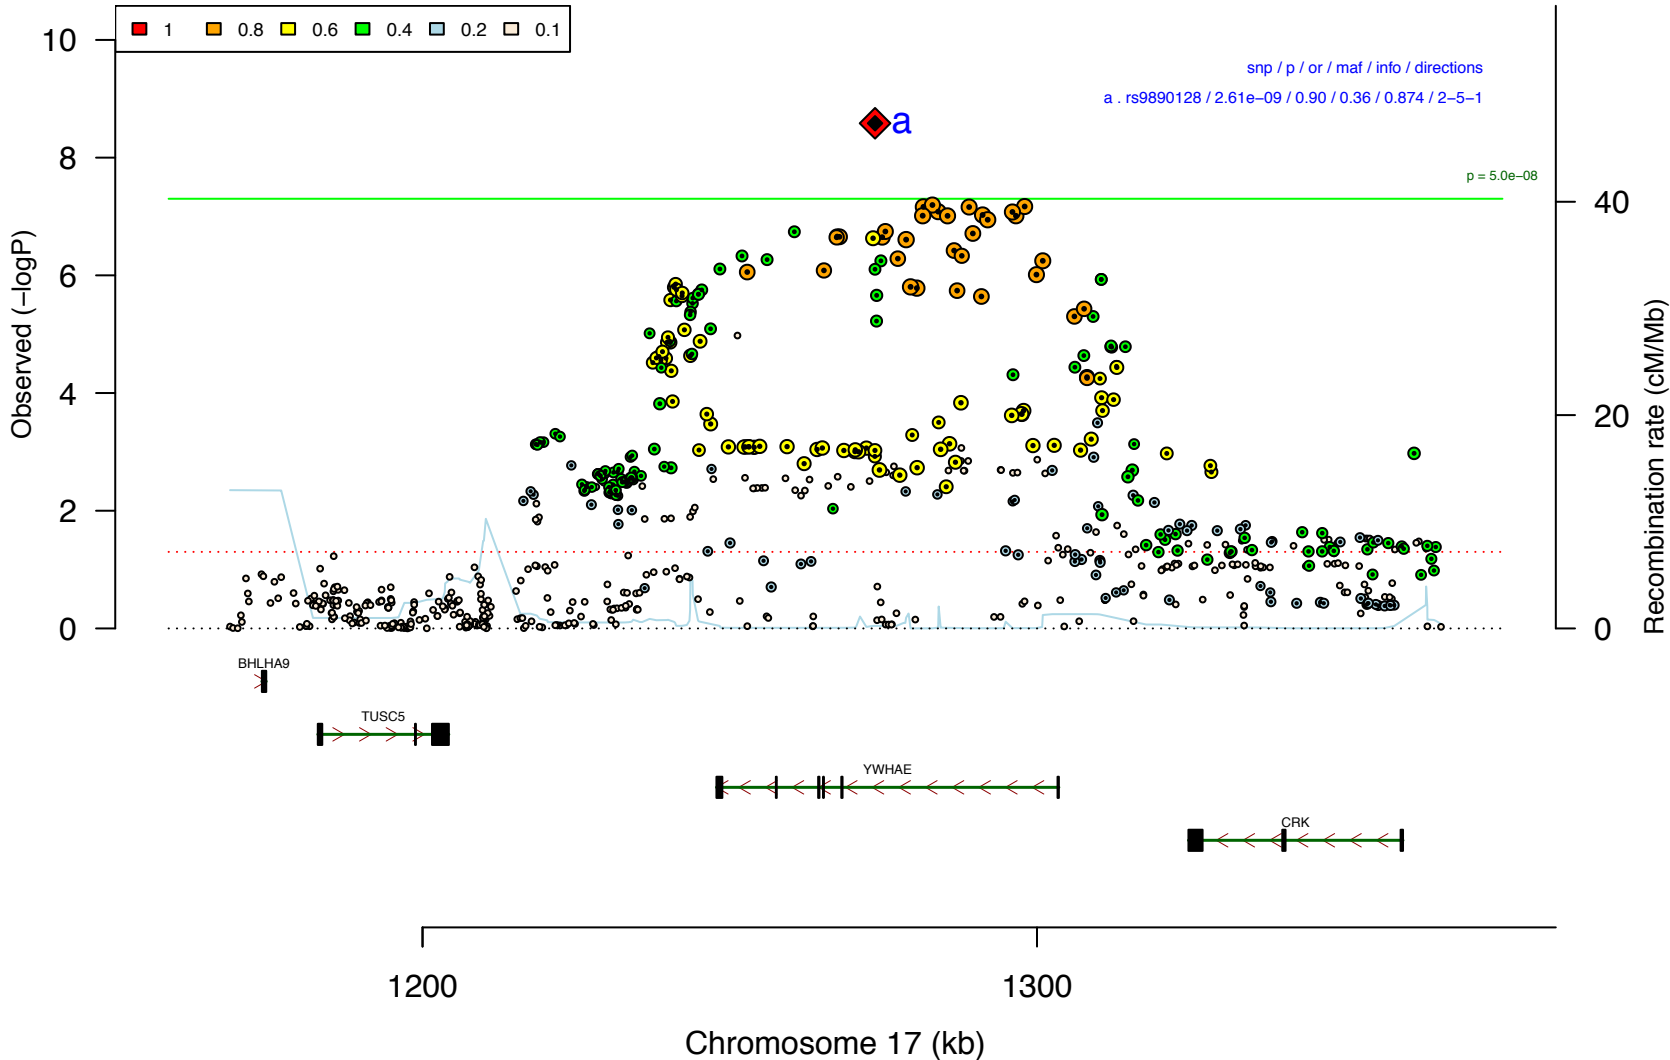

# pgc\_scz\_asia\_ASNstage12.18.chr18

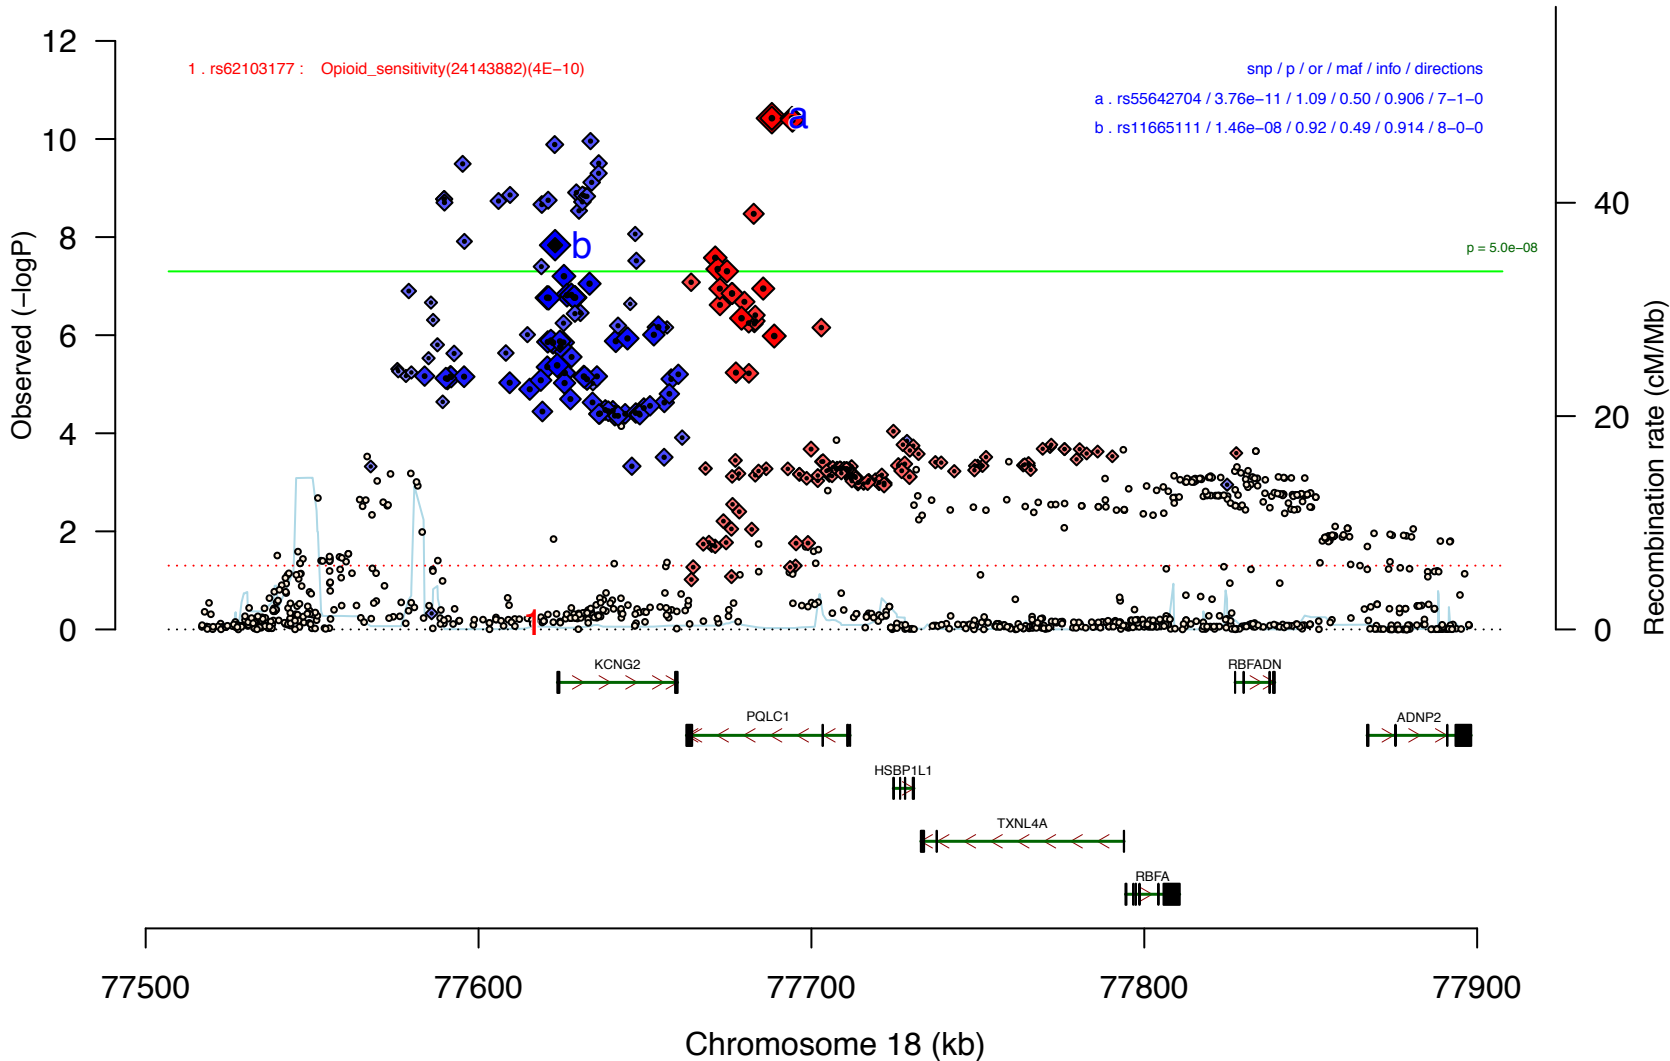

Supplement: NIHMS1539625-supplement-4.pdf [file NIHMS1539625-supplement-4.pdf]
