# Supplementary material
Source: PubMed Central journal article supplement (PMC6885121)
Supplement: NIHMS1539625-supplement-5.pdf [file NIHMS1539625-supplement-5.pdf]

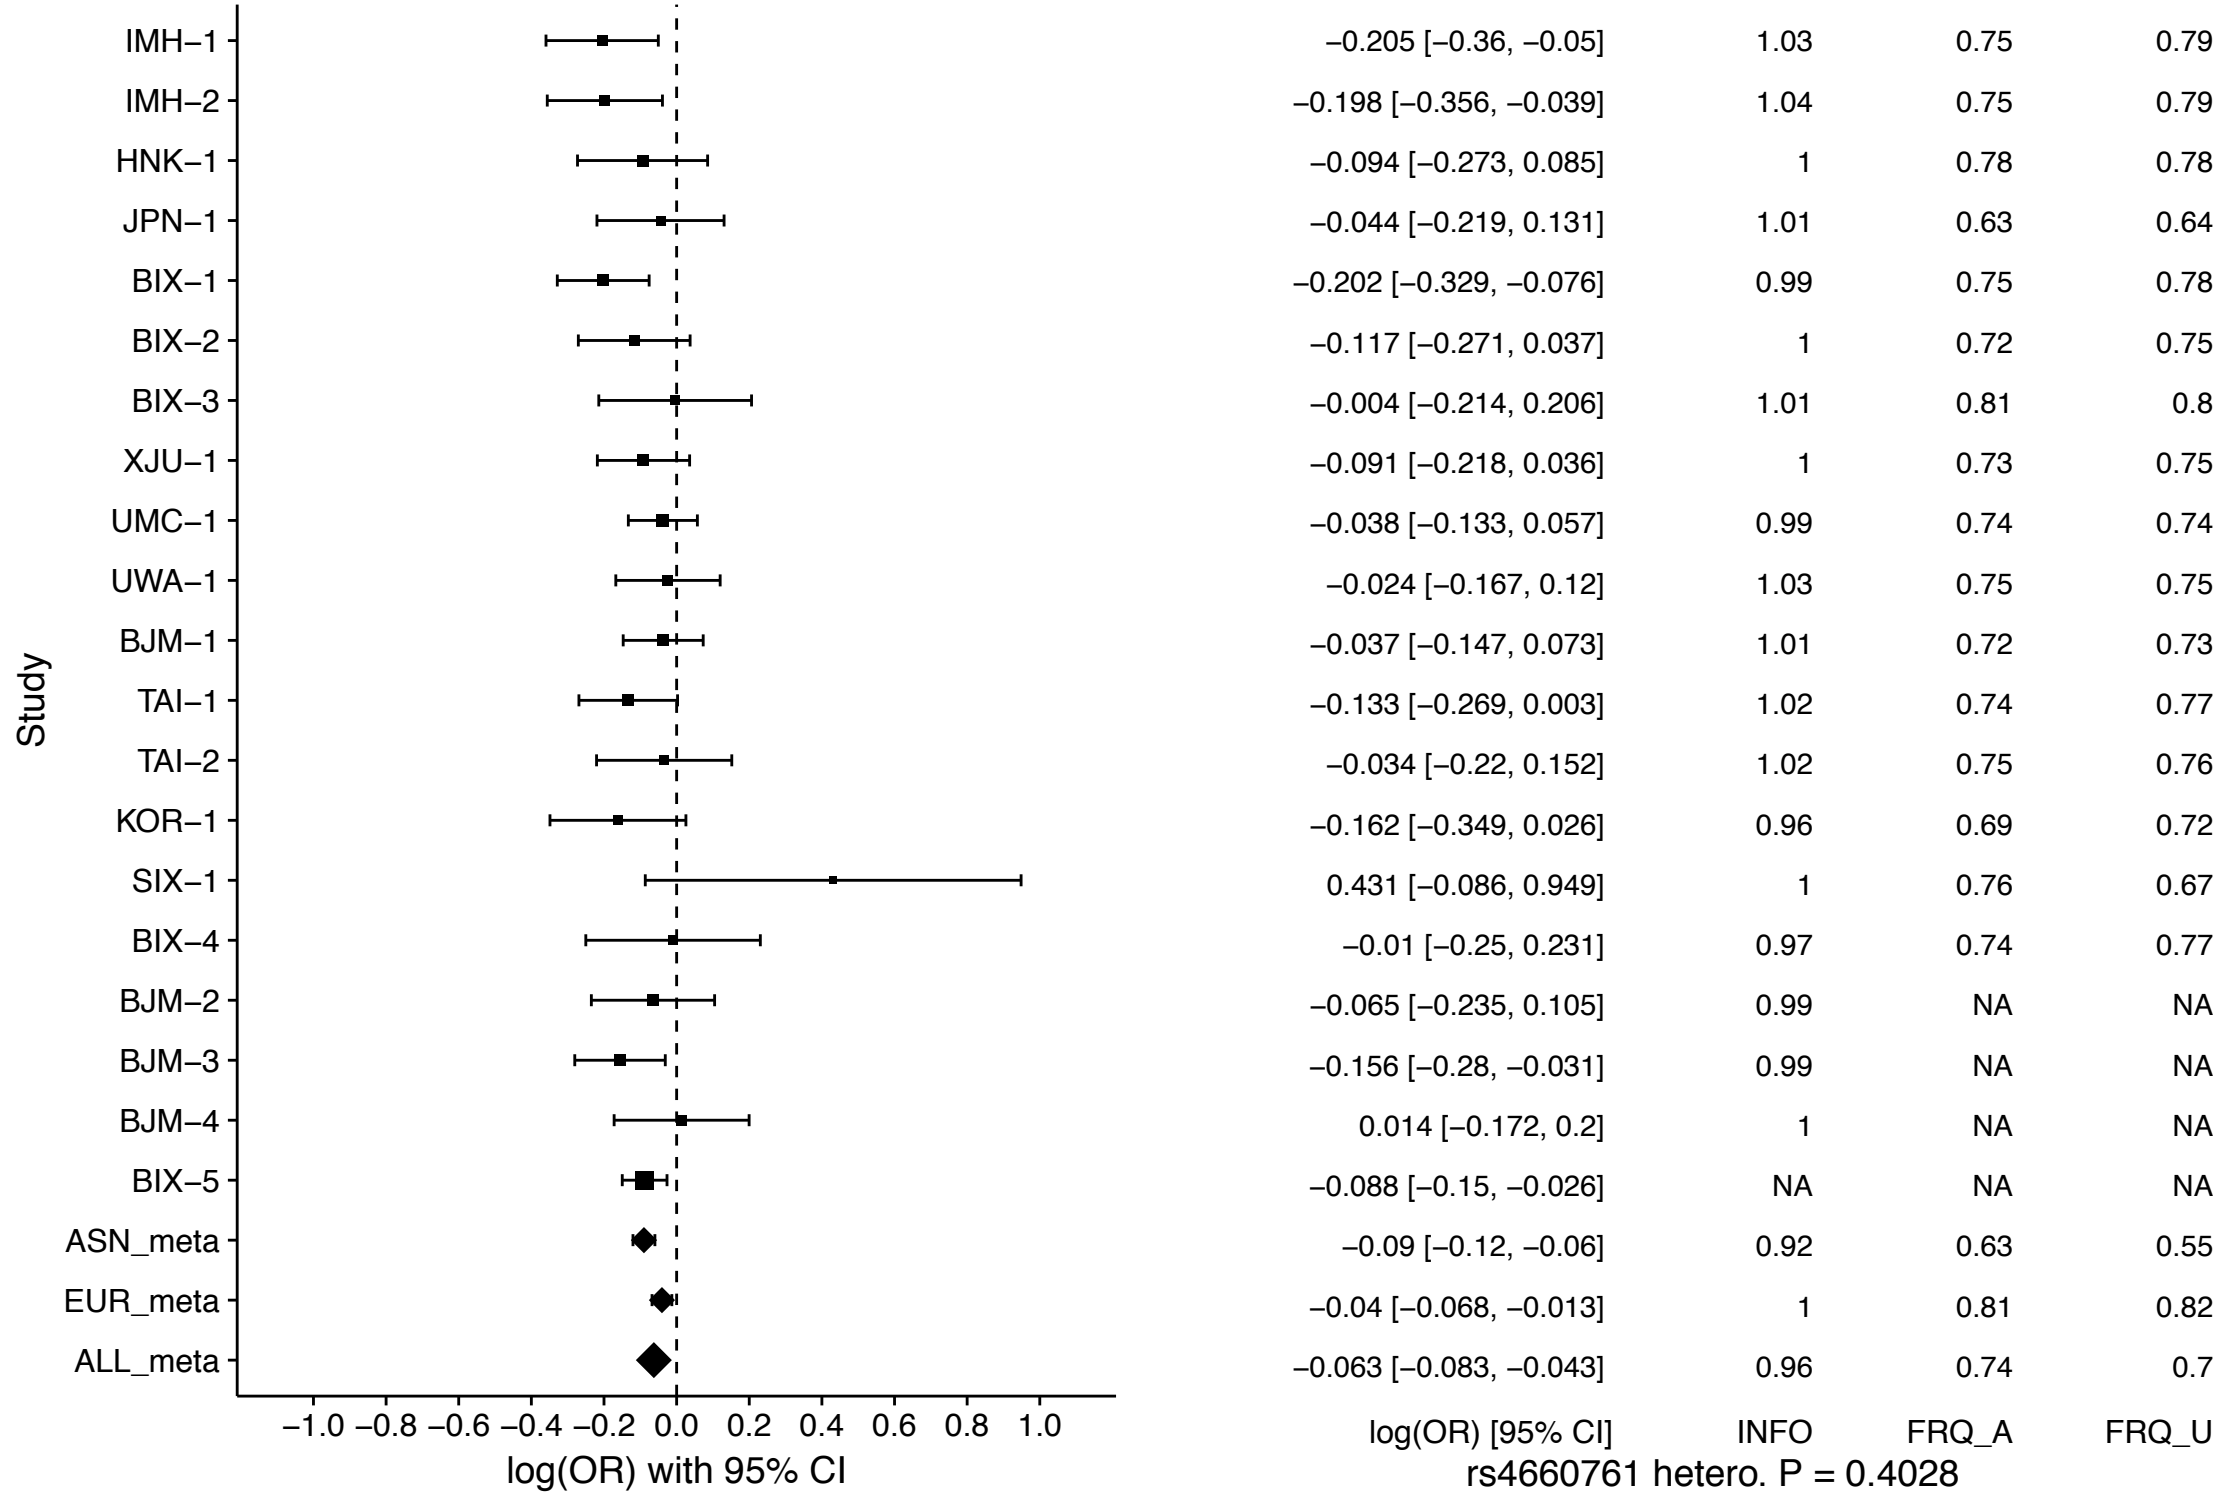

log(OR) [95% CI] INFO FRQ\_A FRQ\_U  
 rs4660761 hetero. P = 0.4028

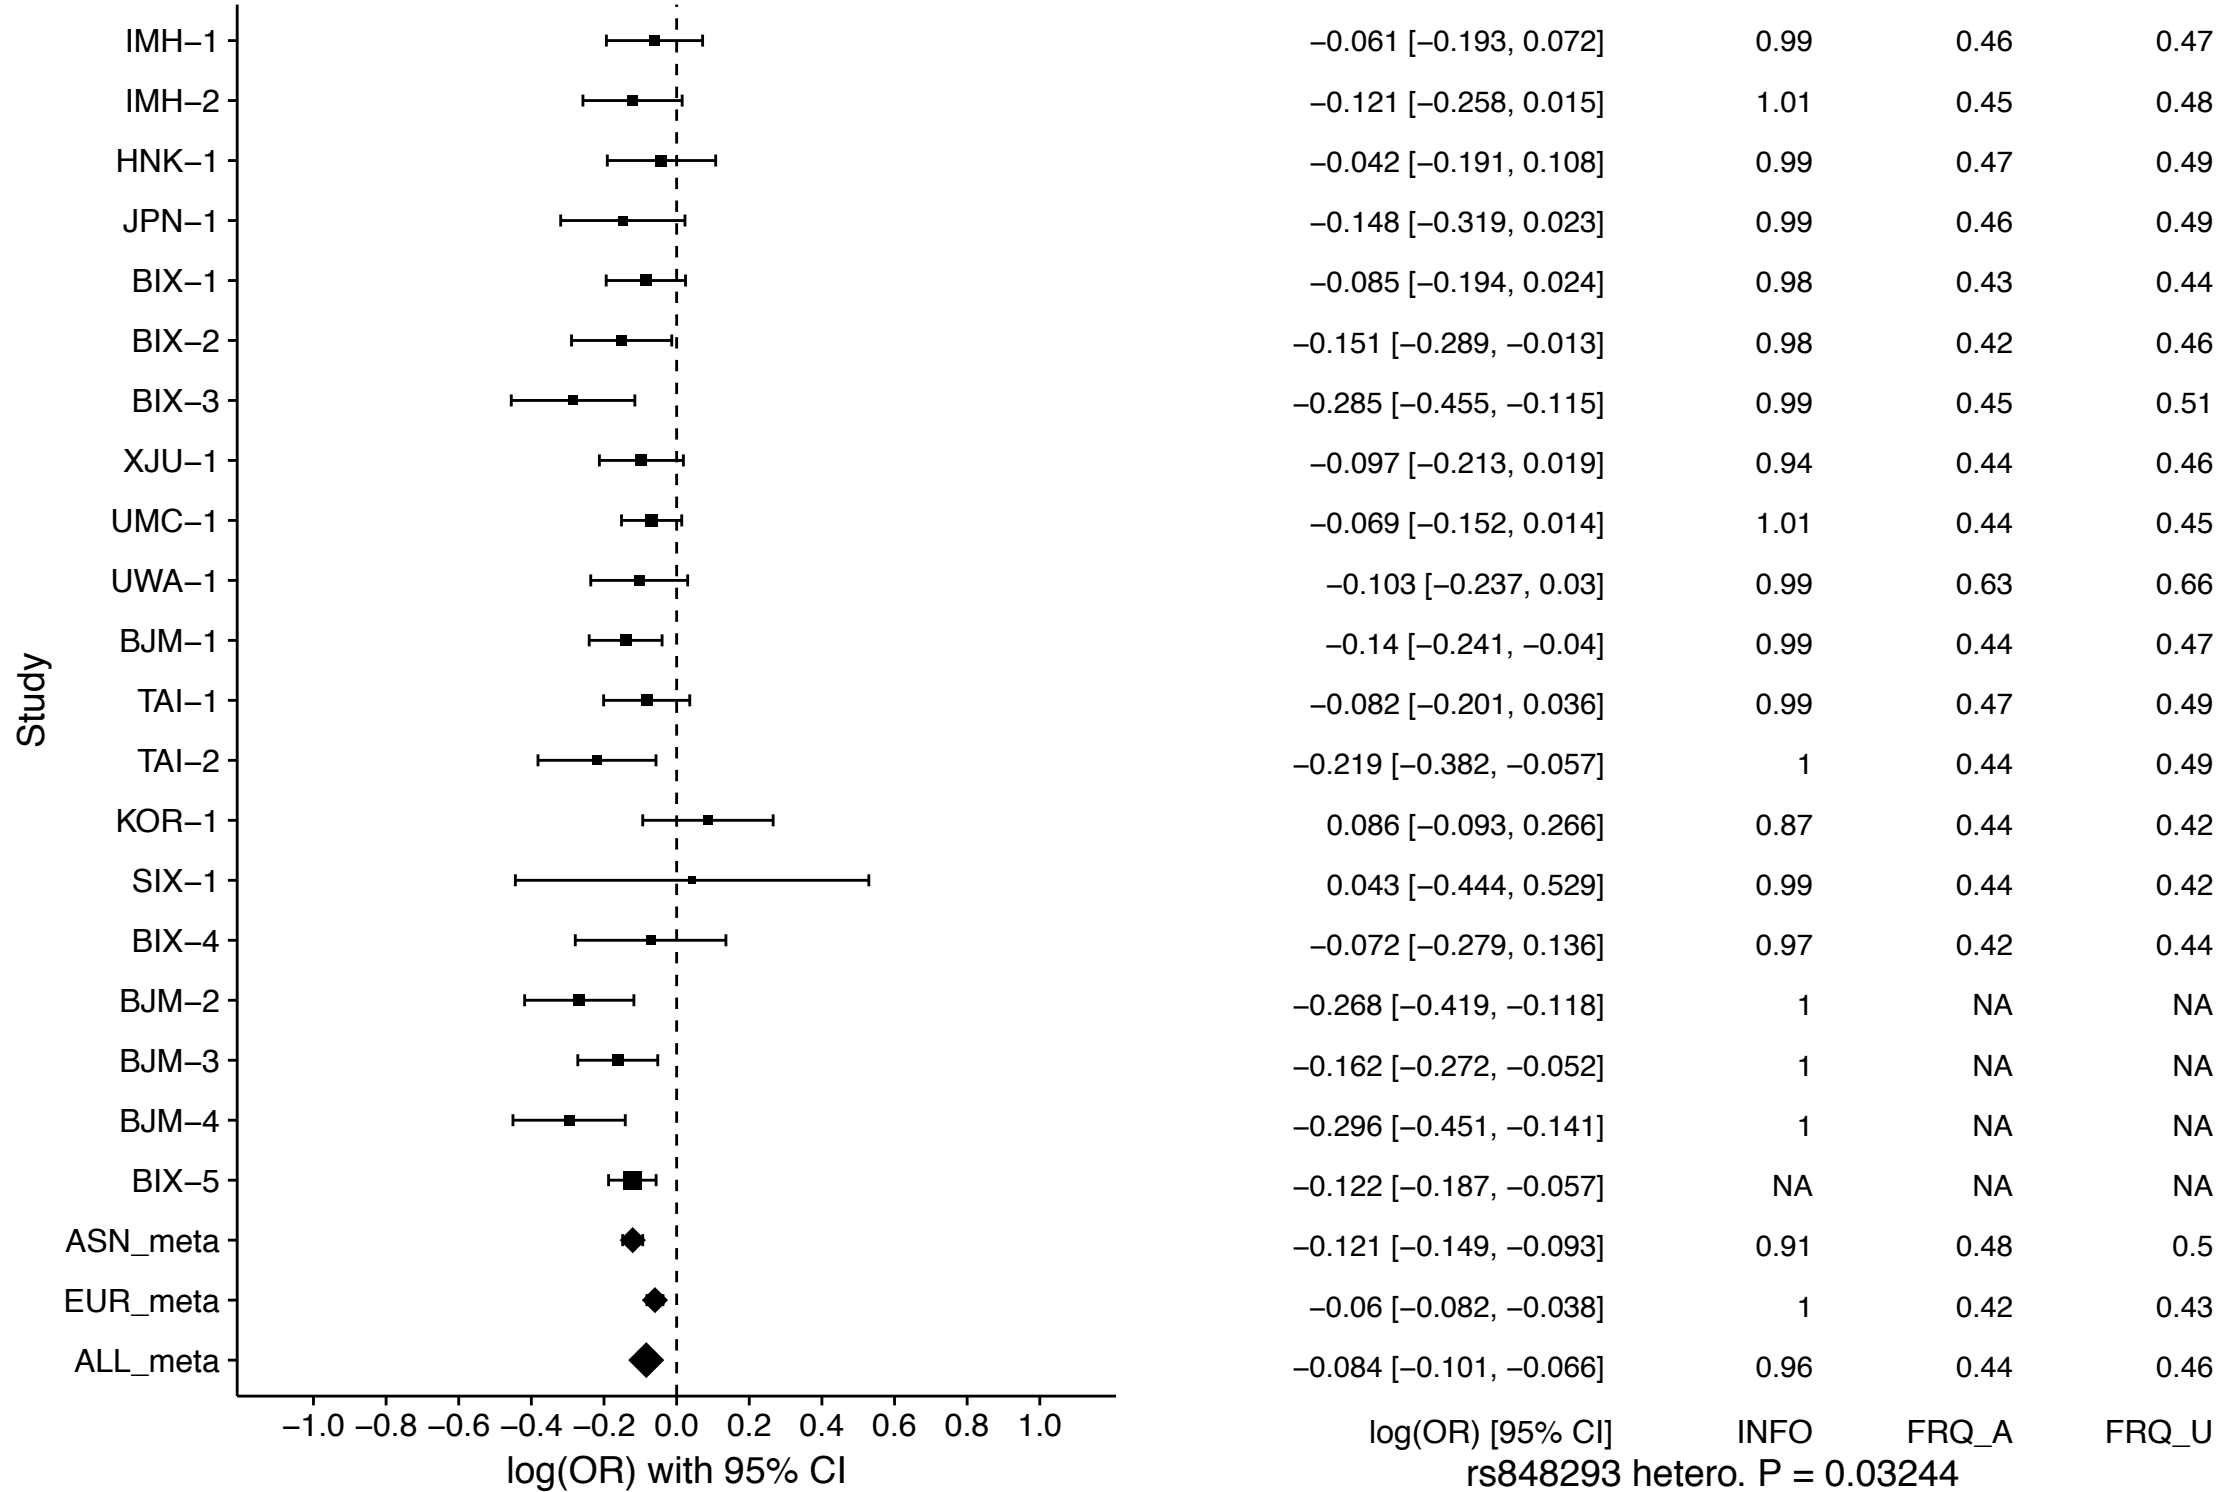

log(OR) [95% CI] INFO FRQ\_A FRQ\_U  
 rs848293 hetero. P = 0.03244

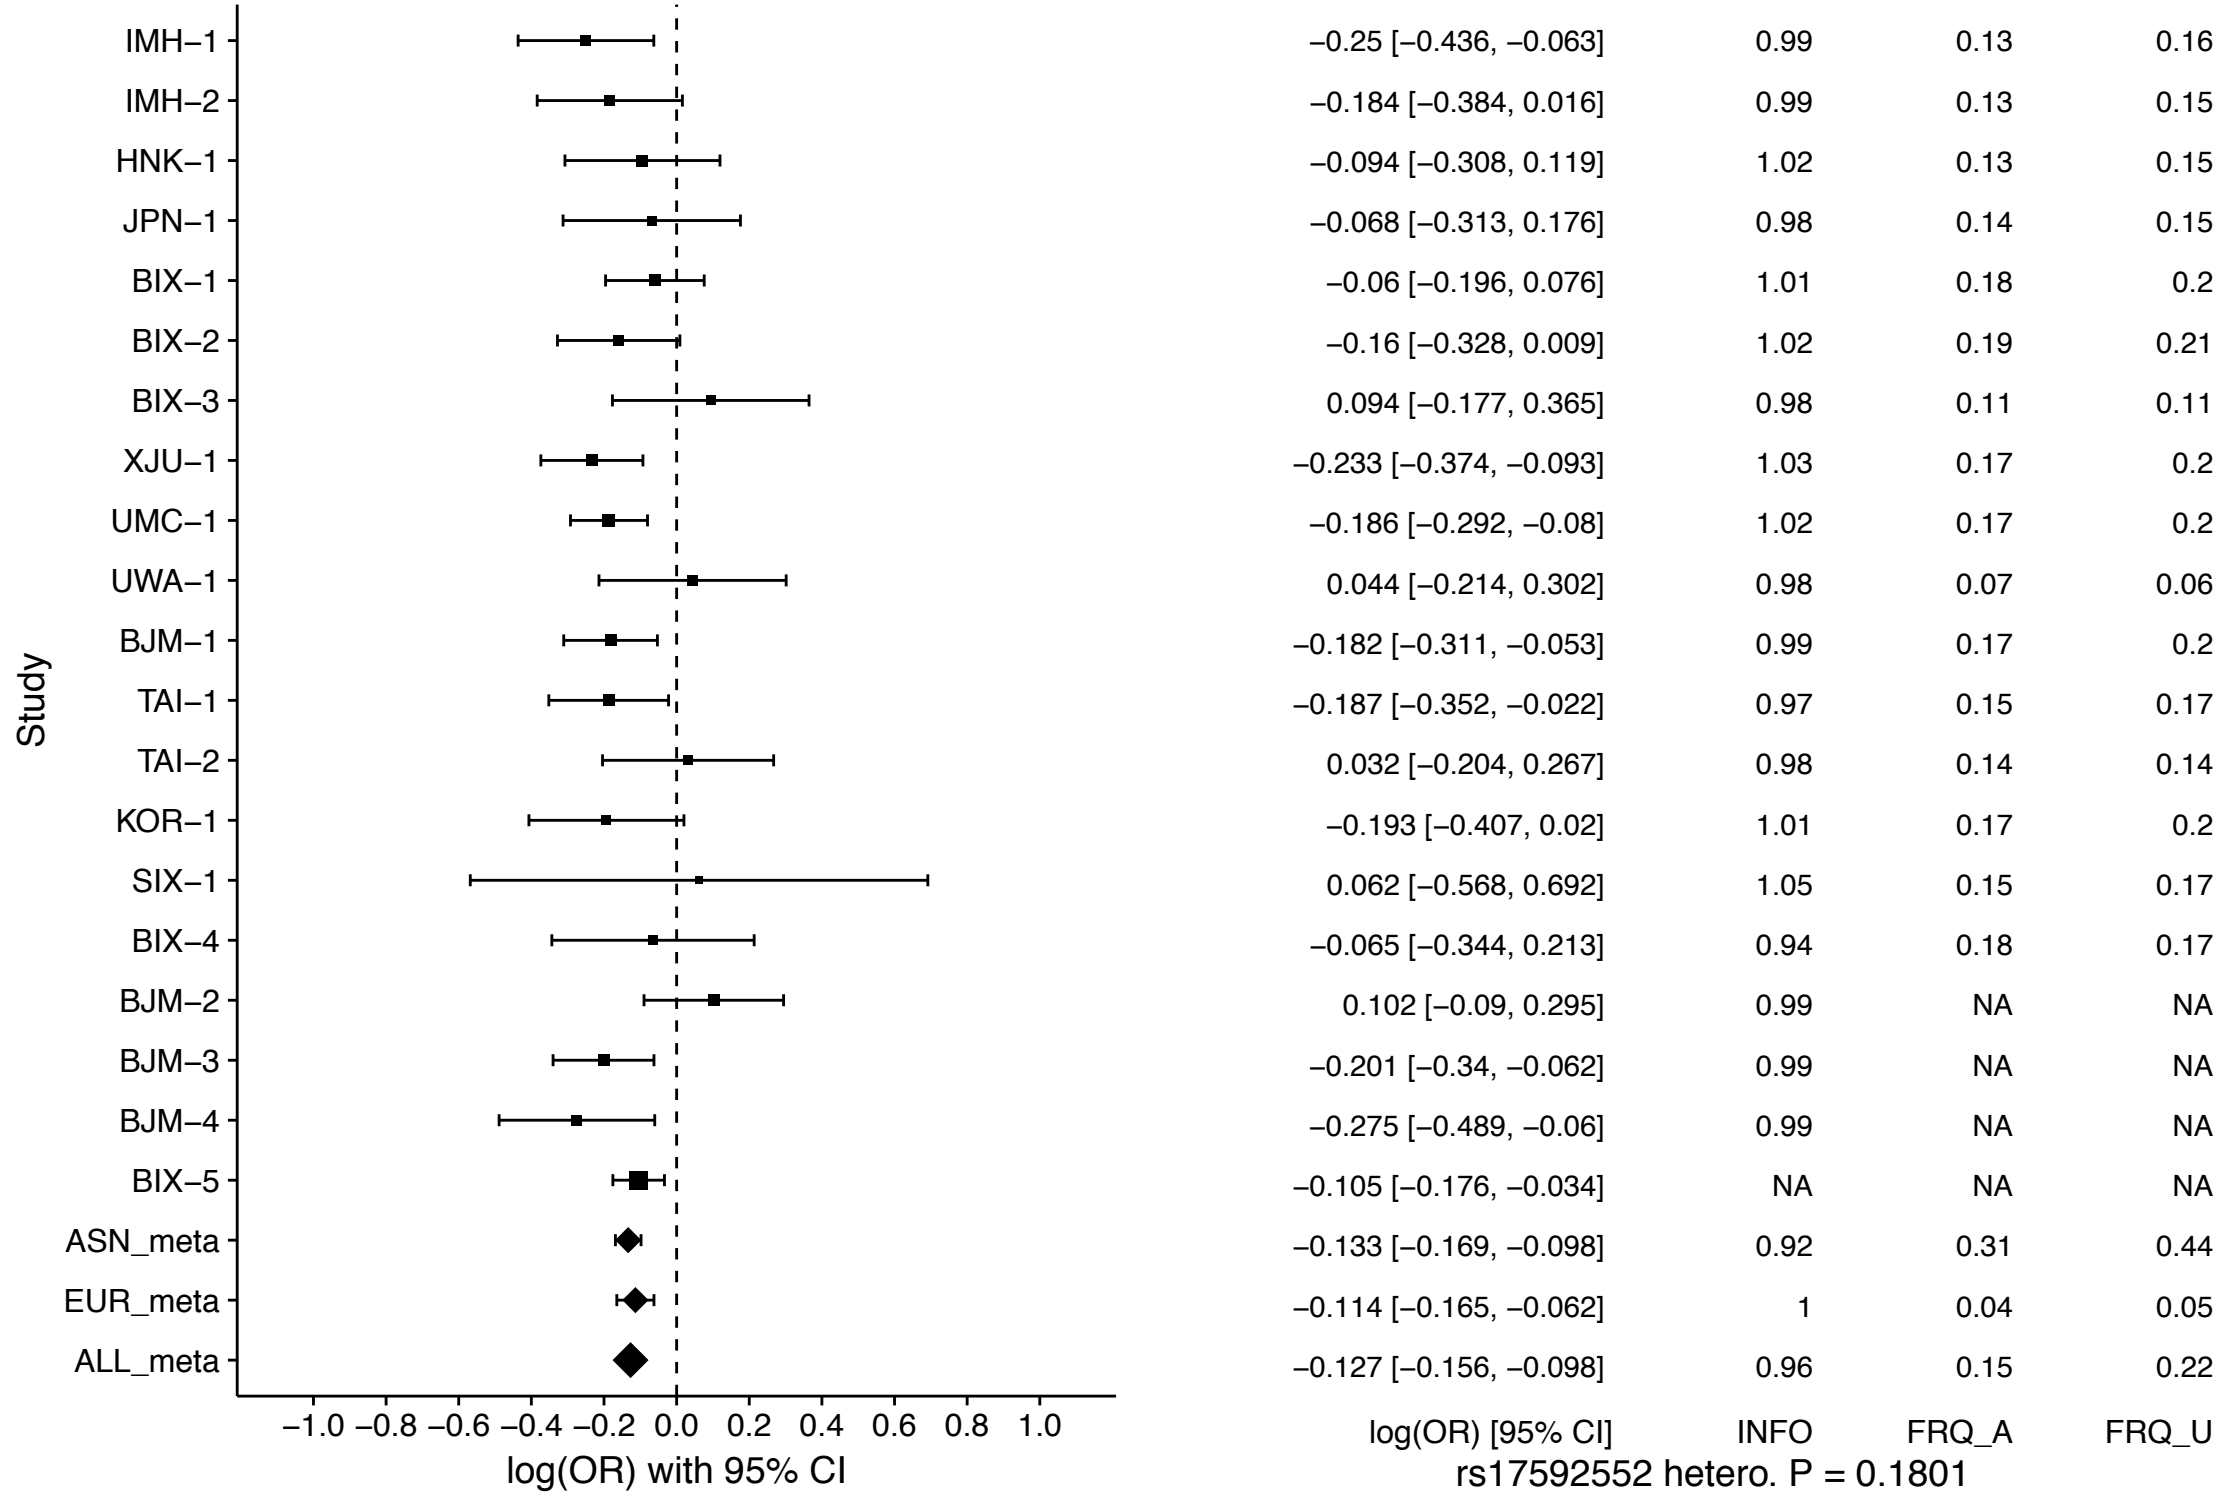

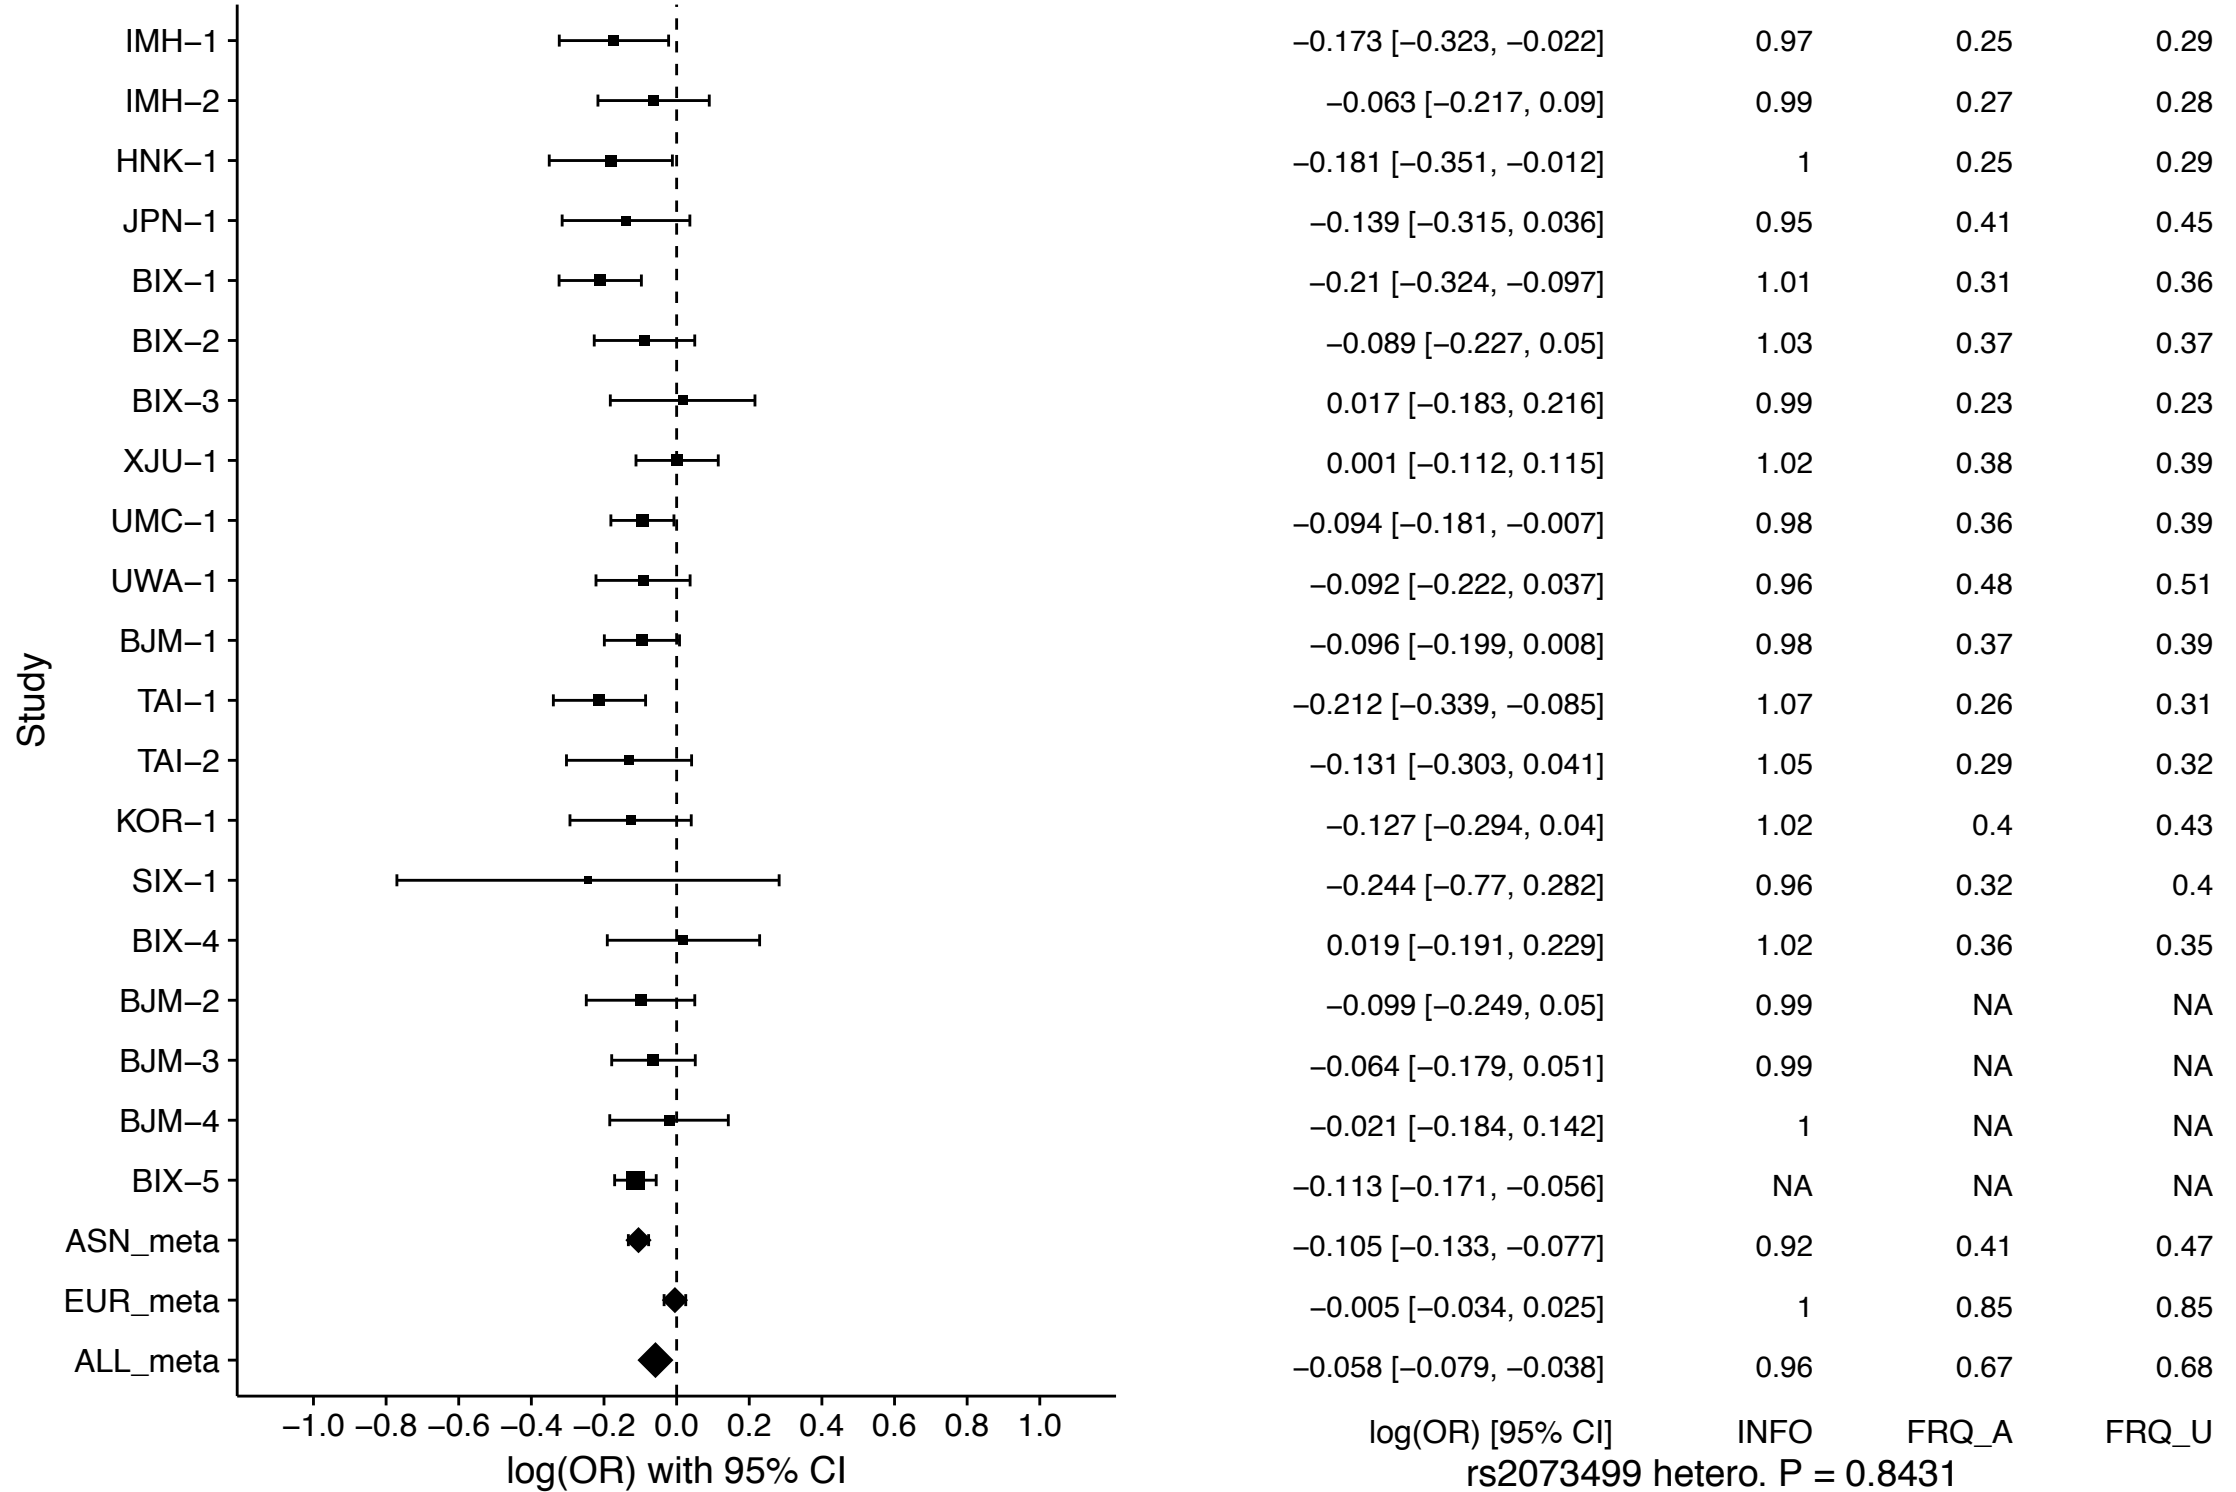

log(OR) [95% CI] INFO FRQ\_A FRQ\_U  
 rs2073499 hetero. P = 0.8431

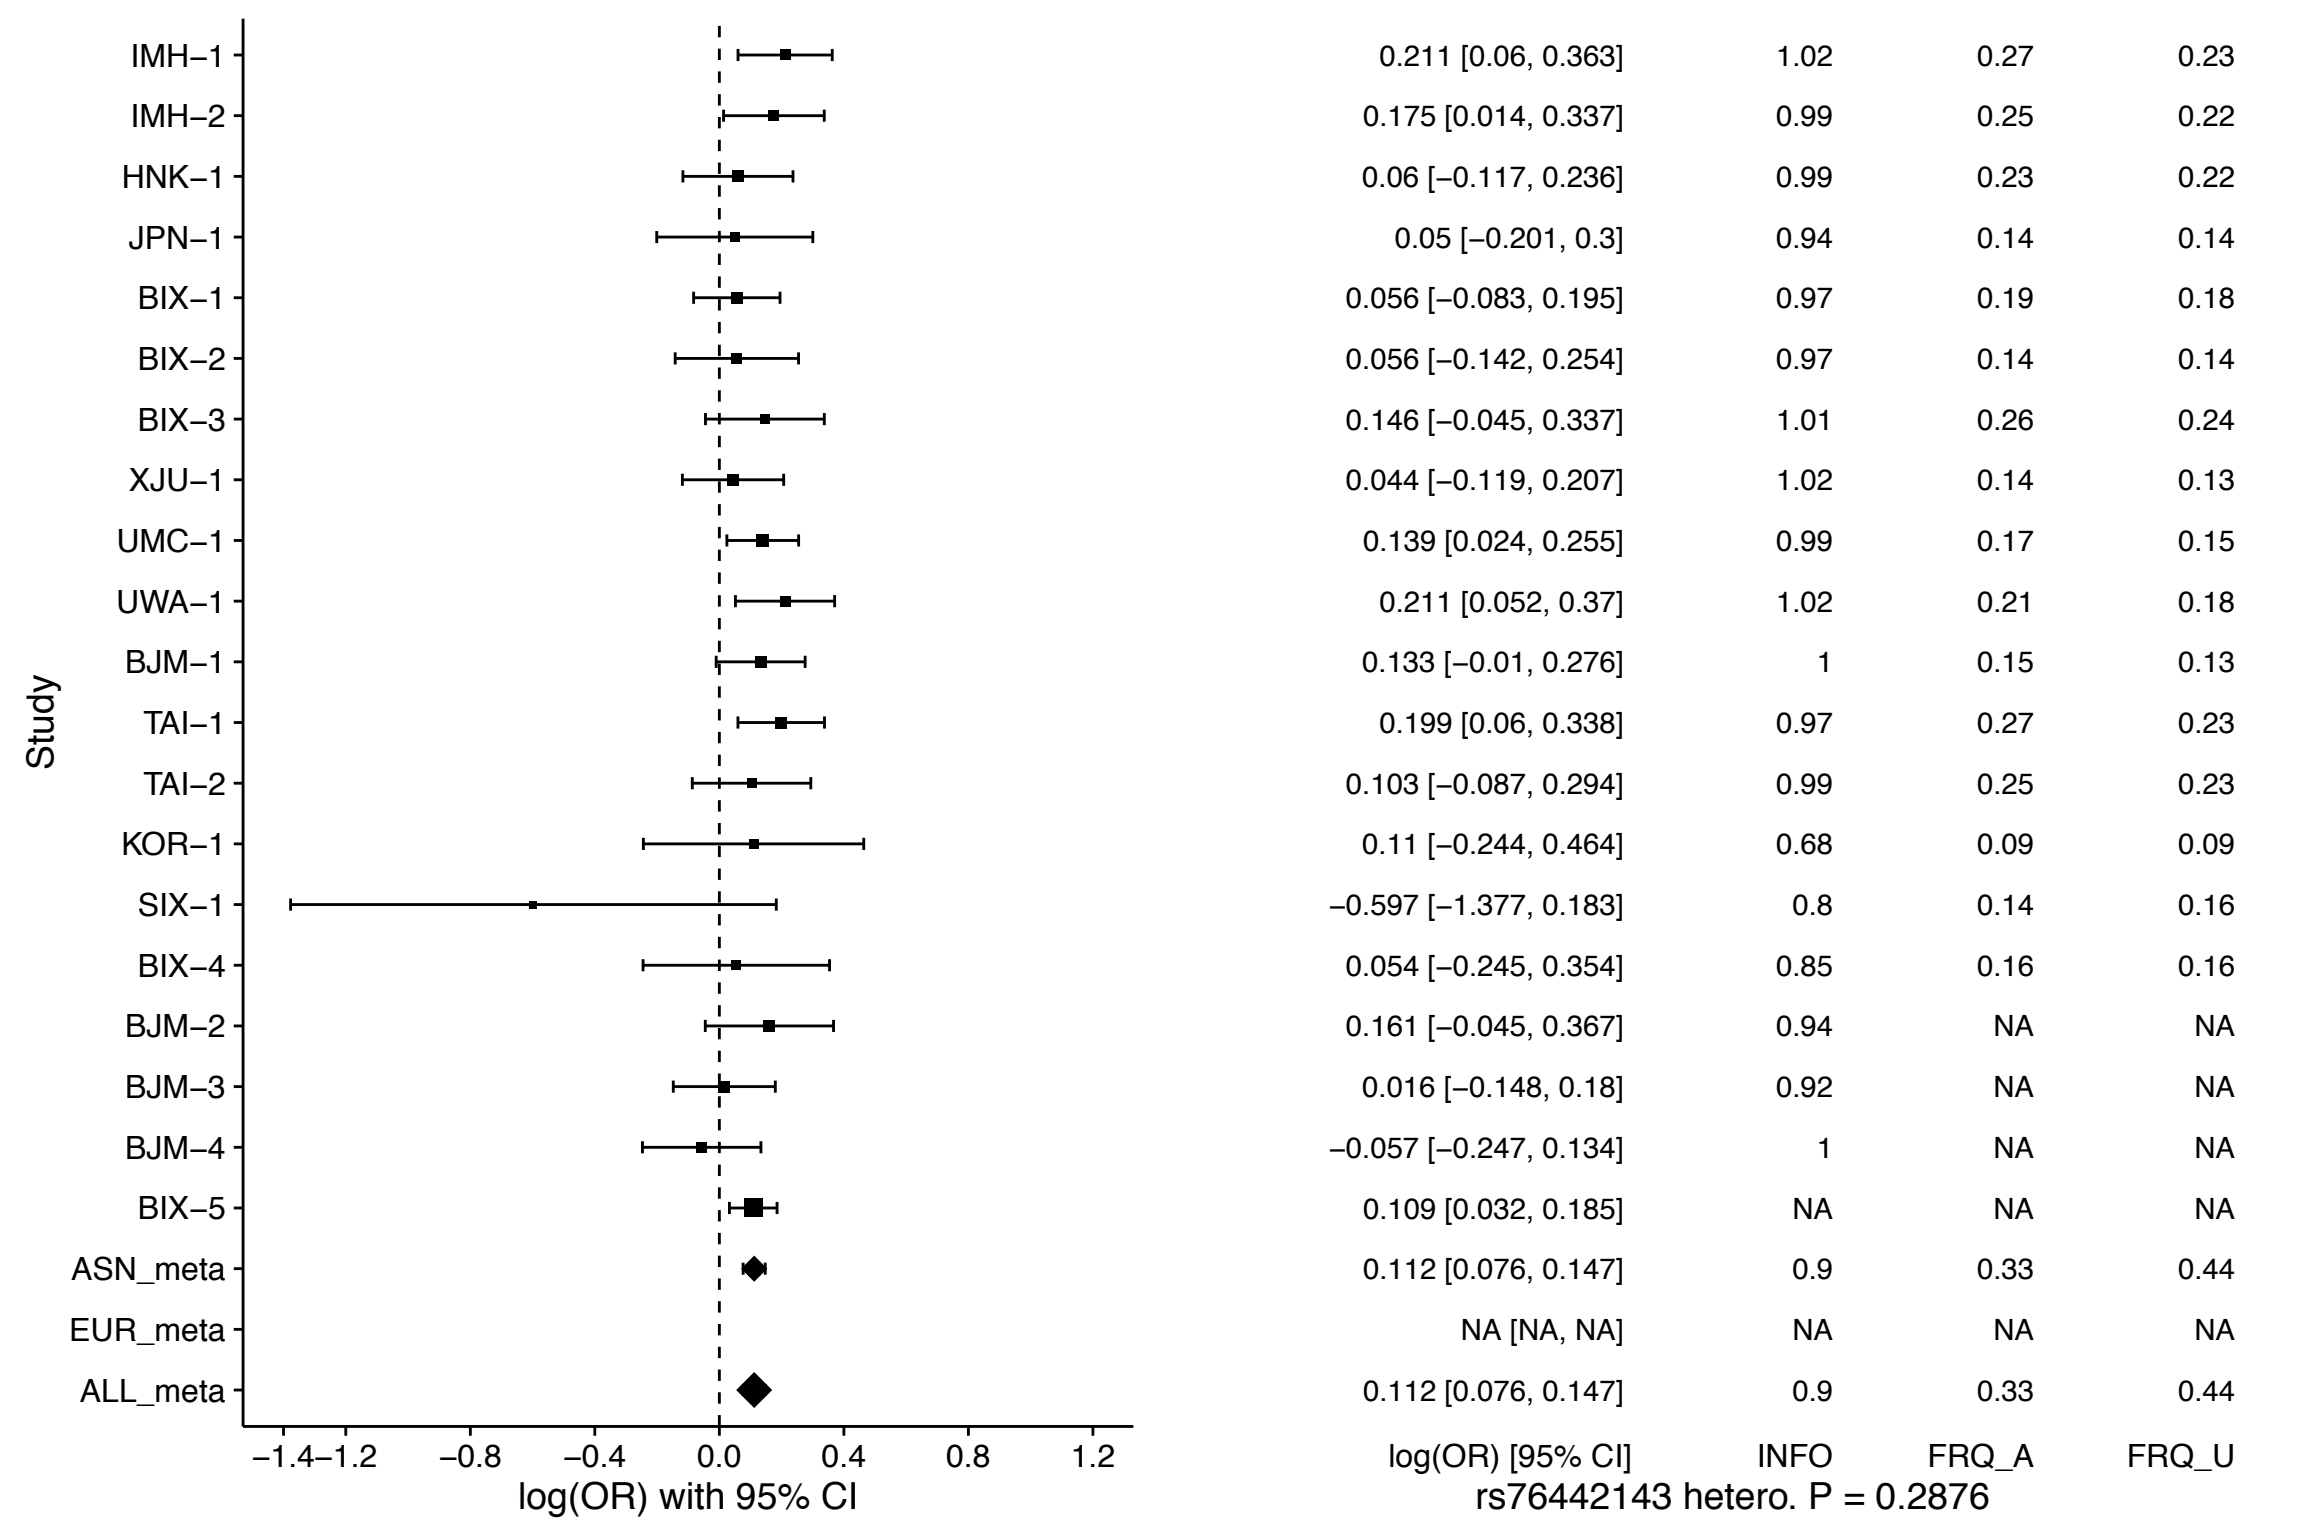

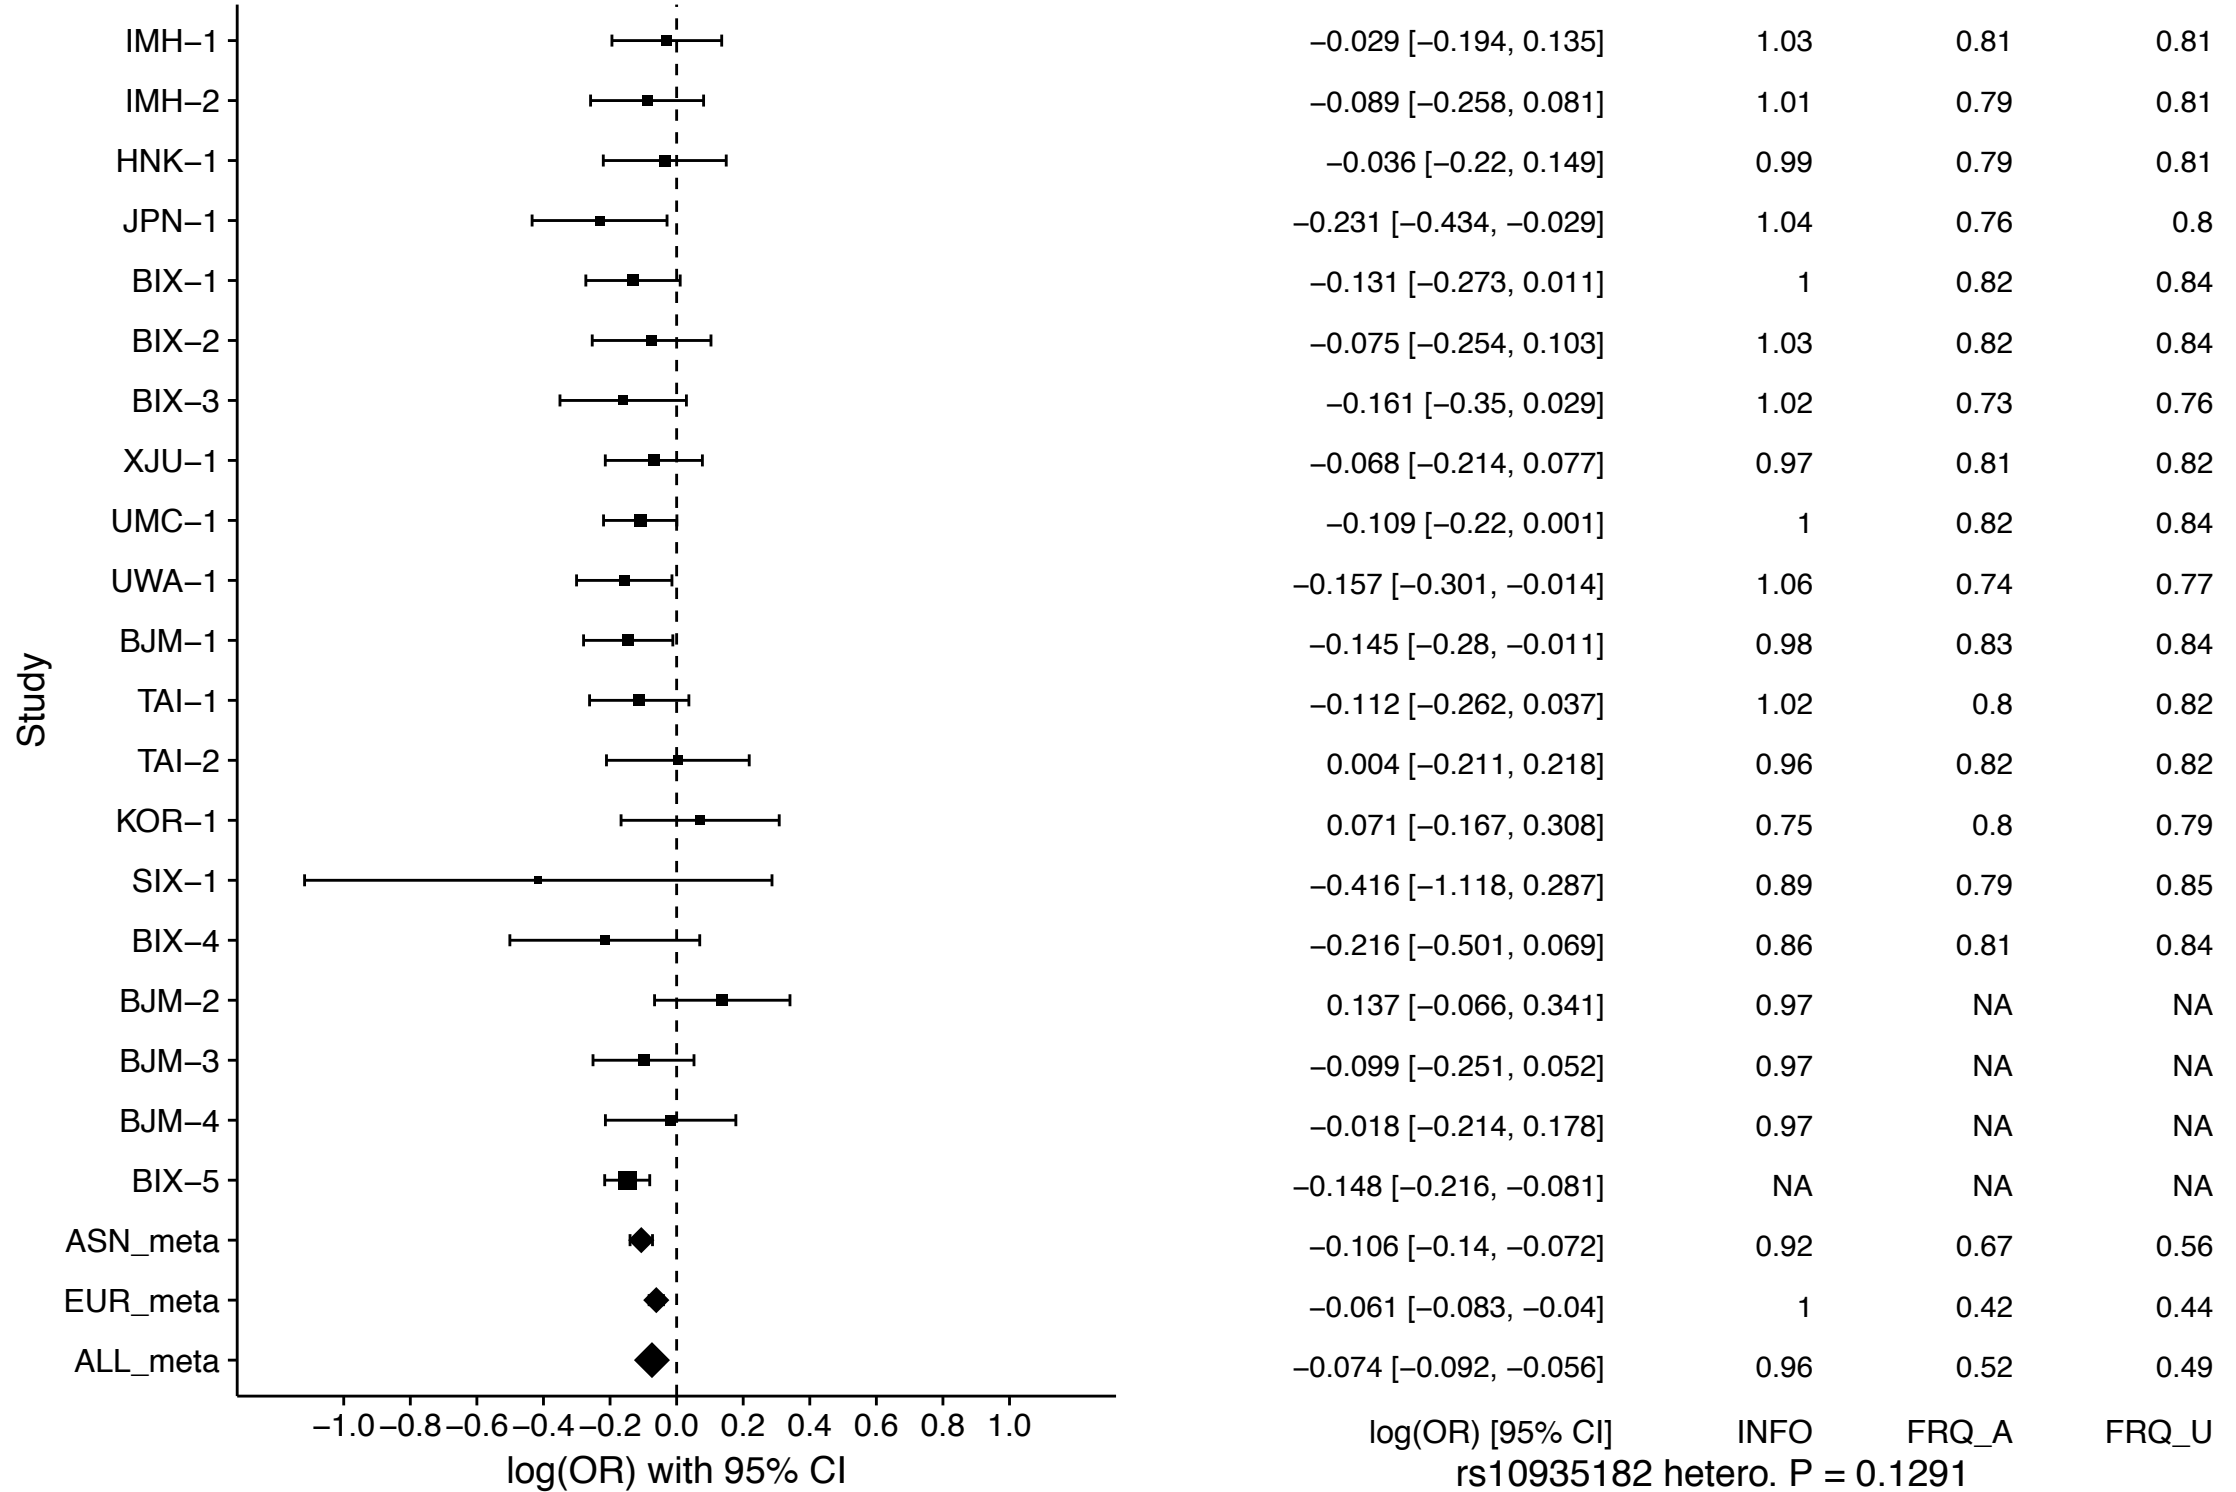

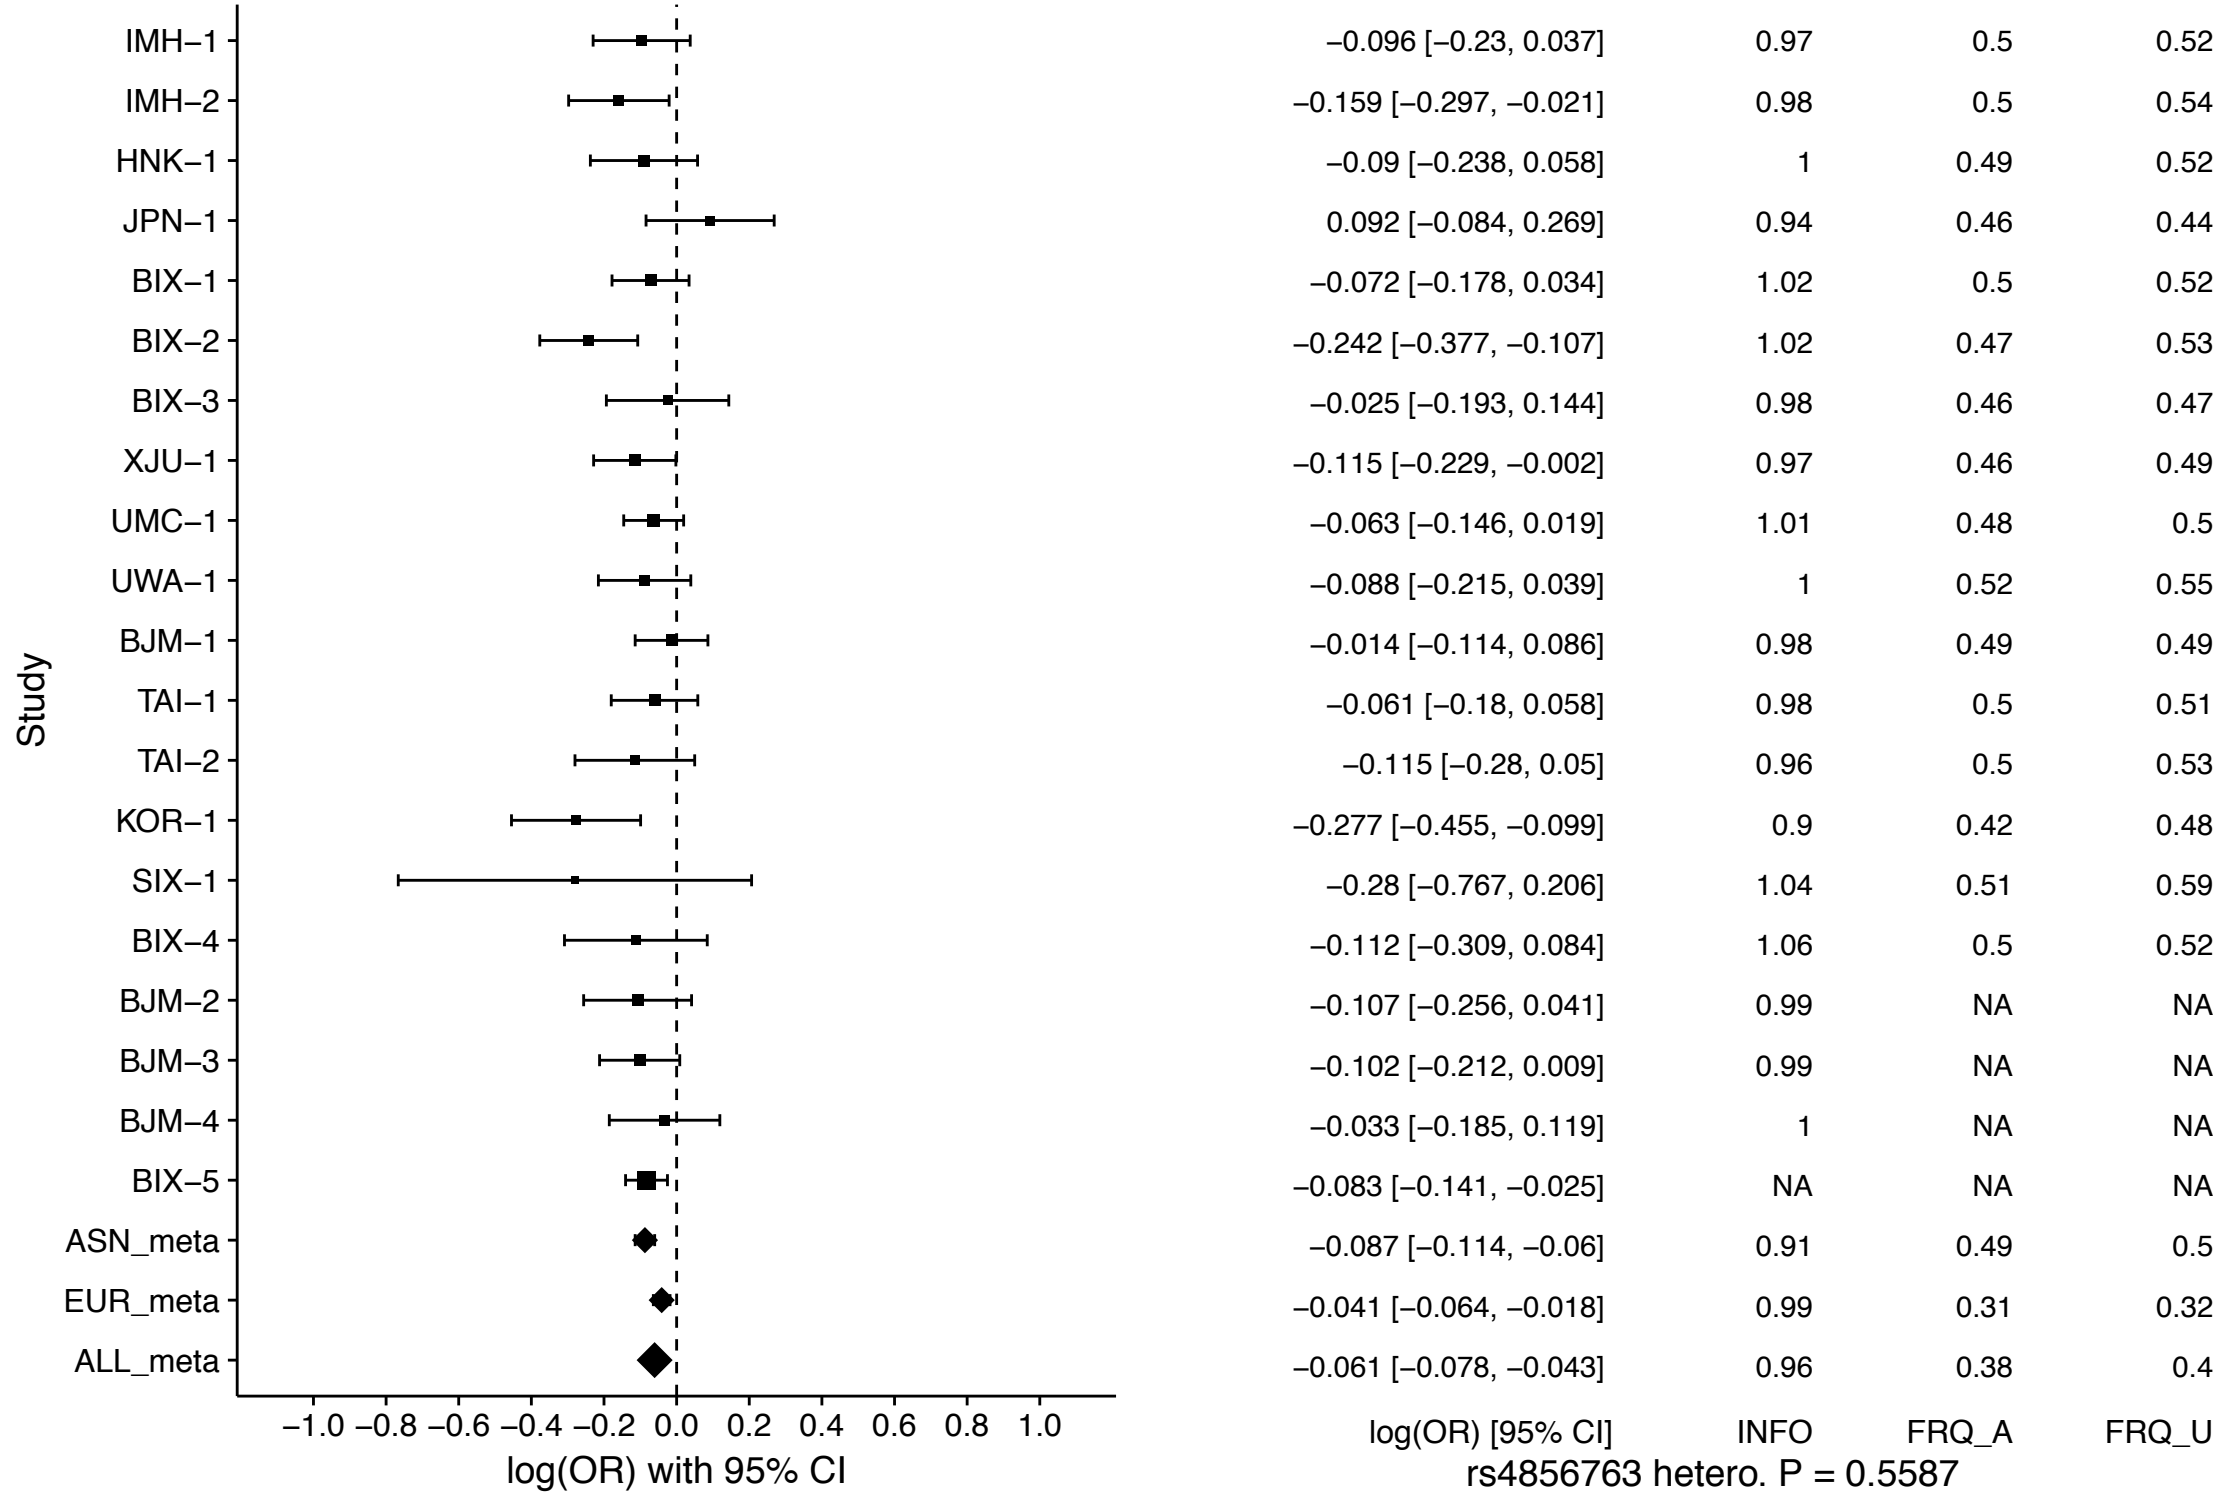

log(OR) [95% CI] INFO FRQ\_A FRQ\_U  
 rs4856763 hetero. P = 0.5587

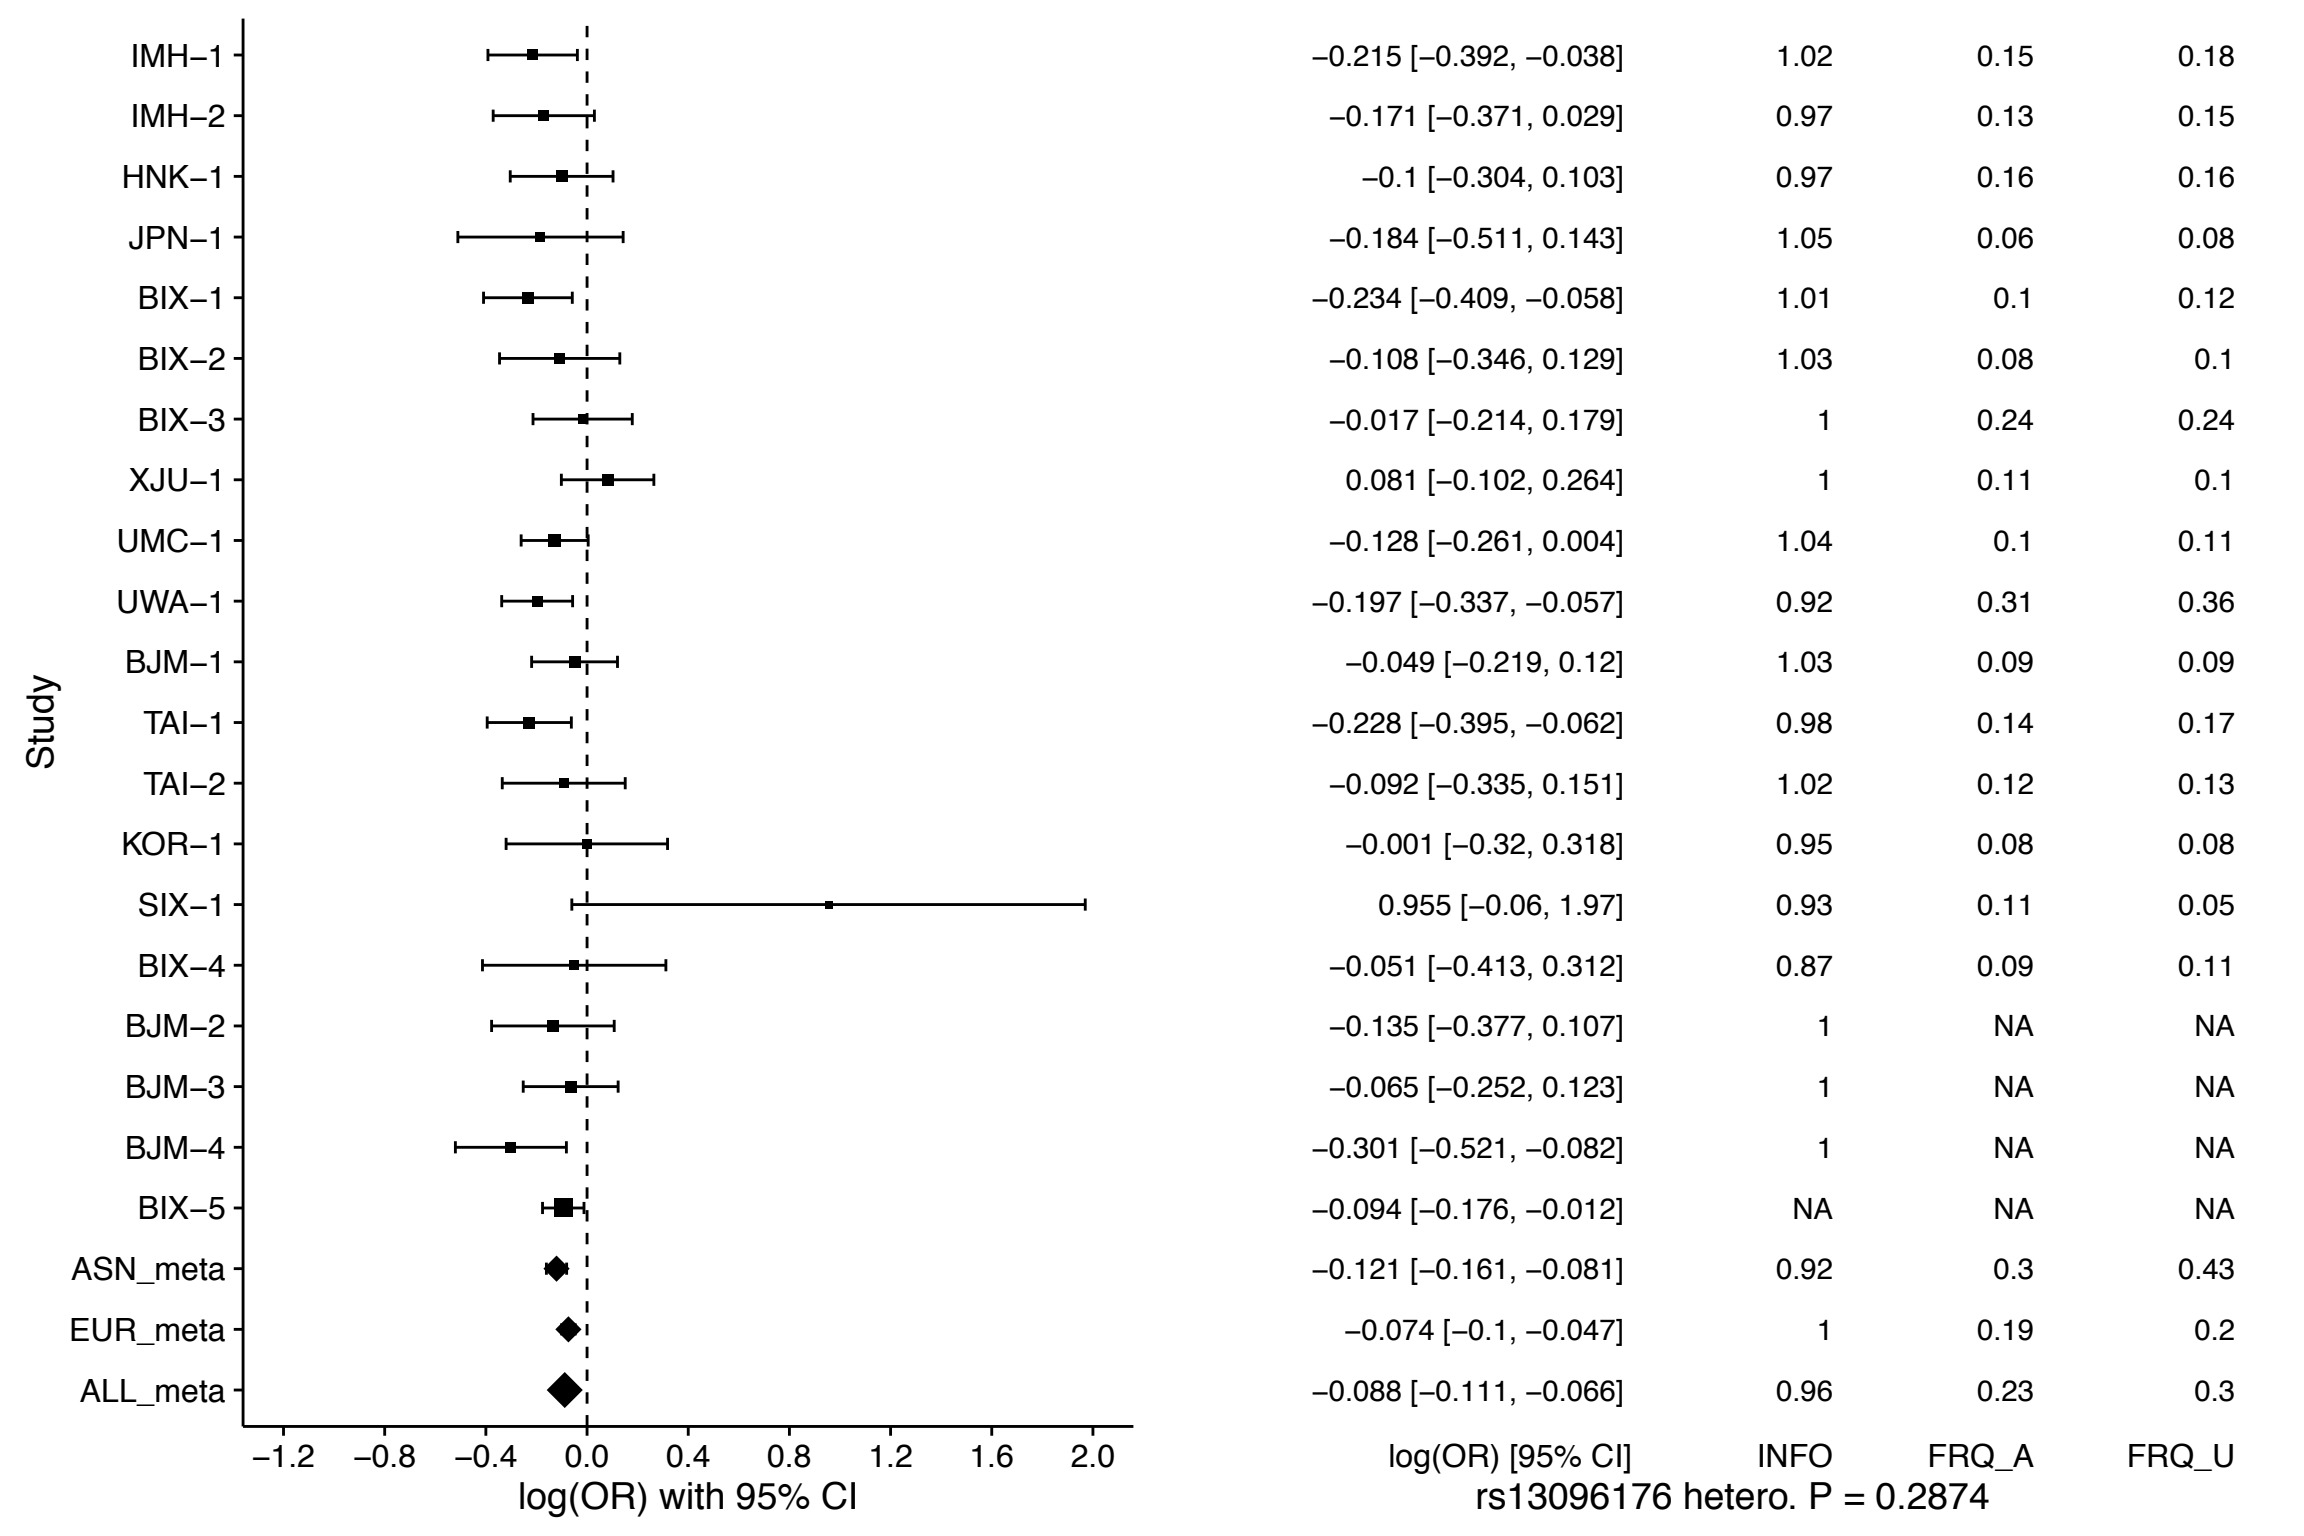



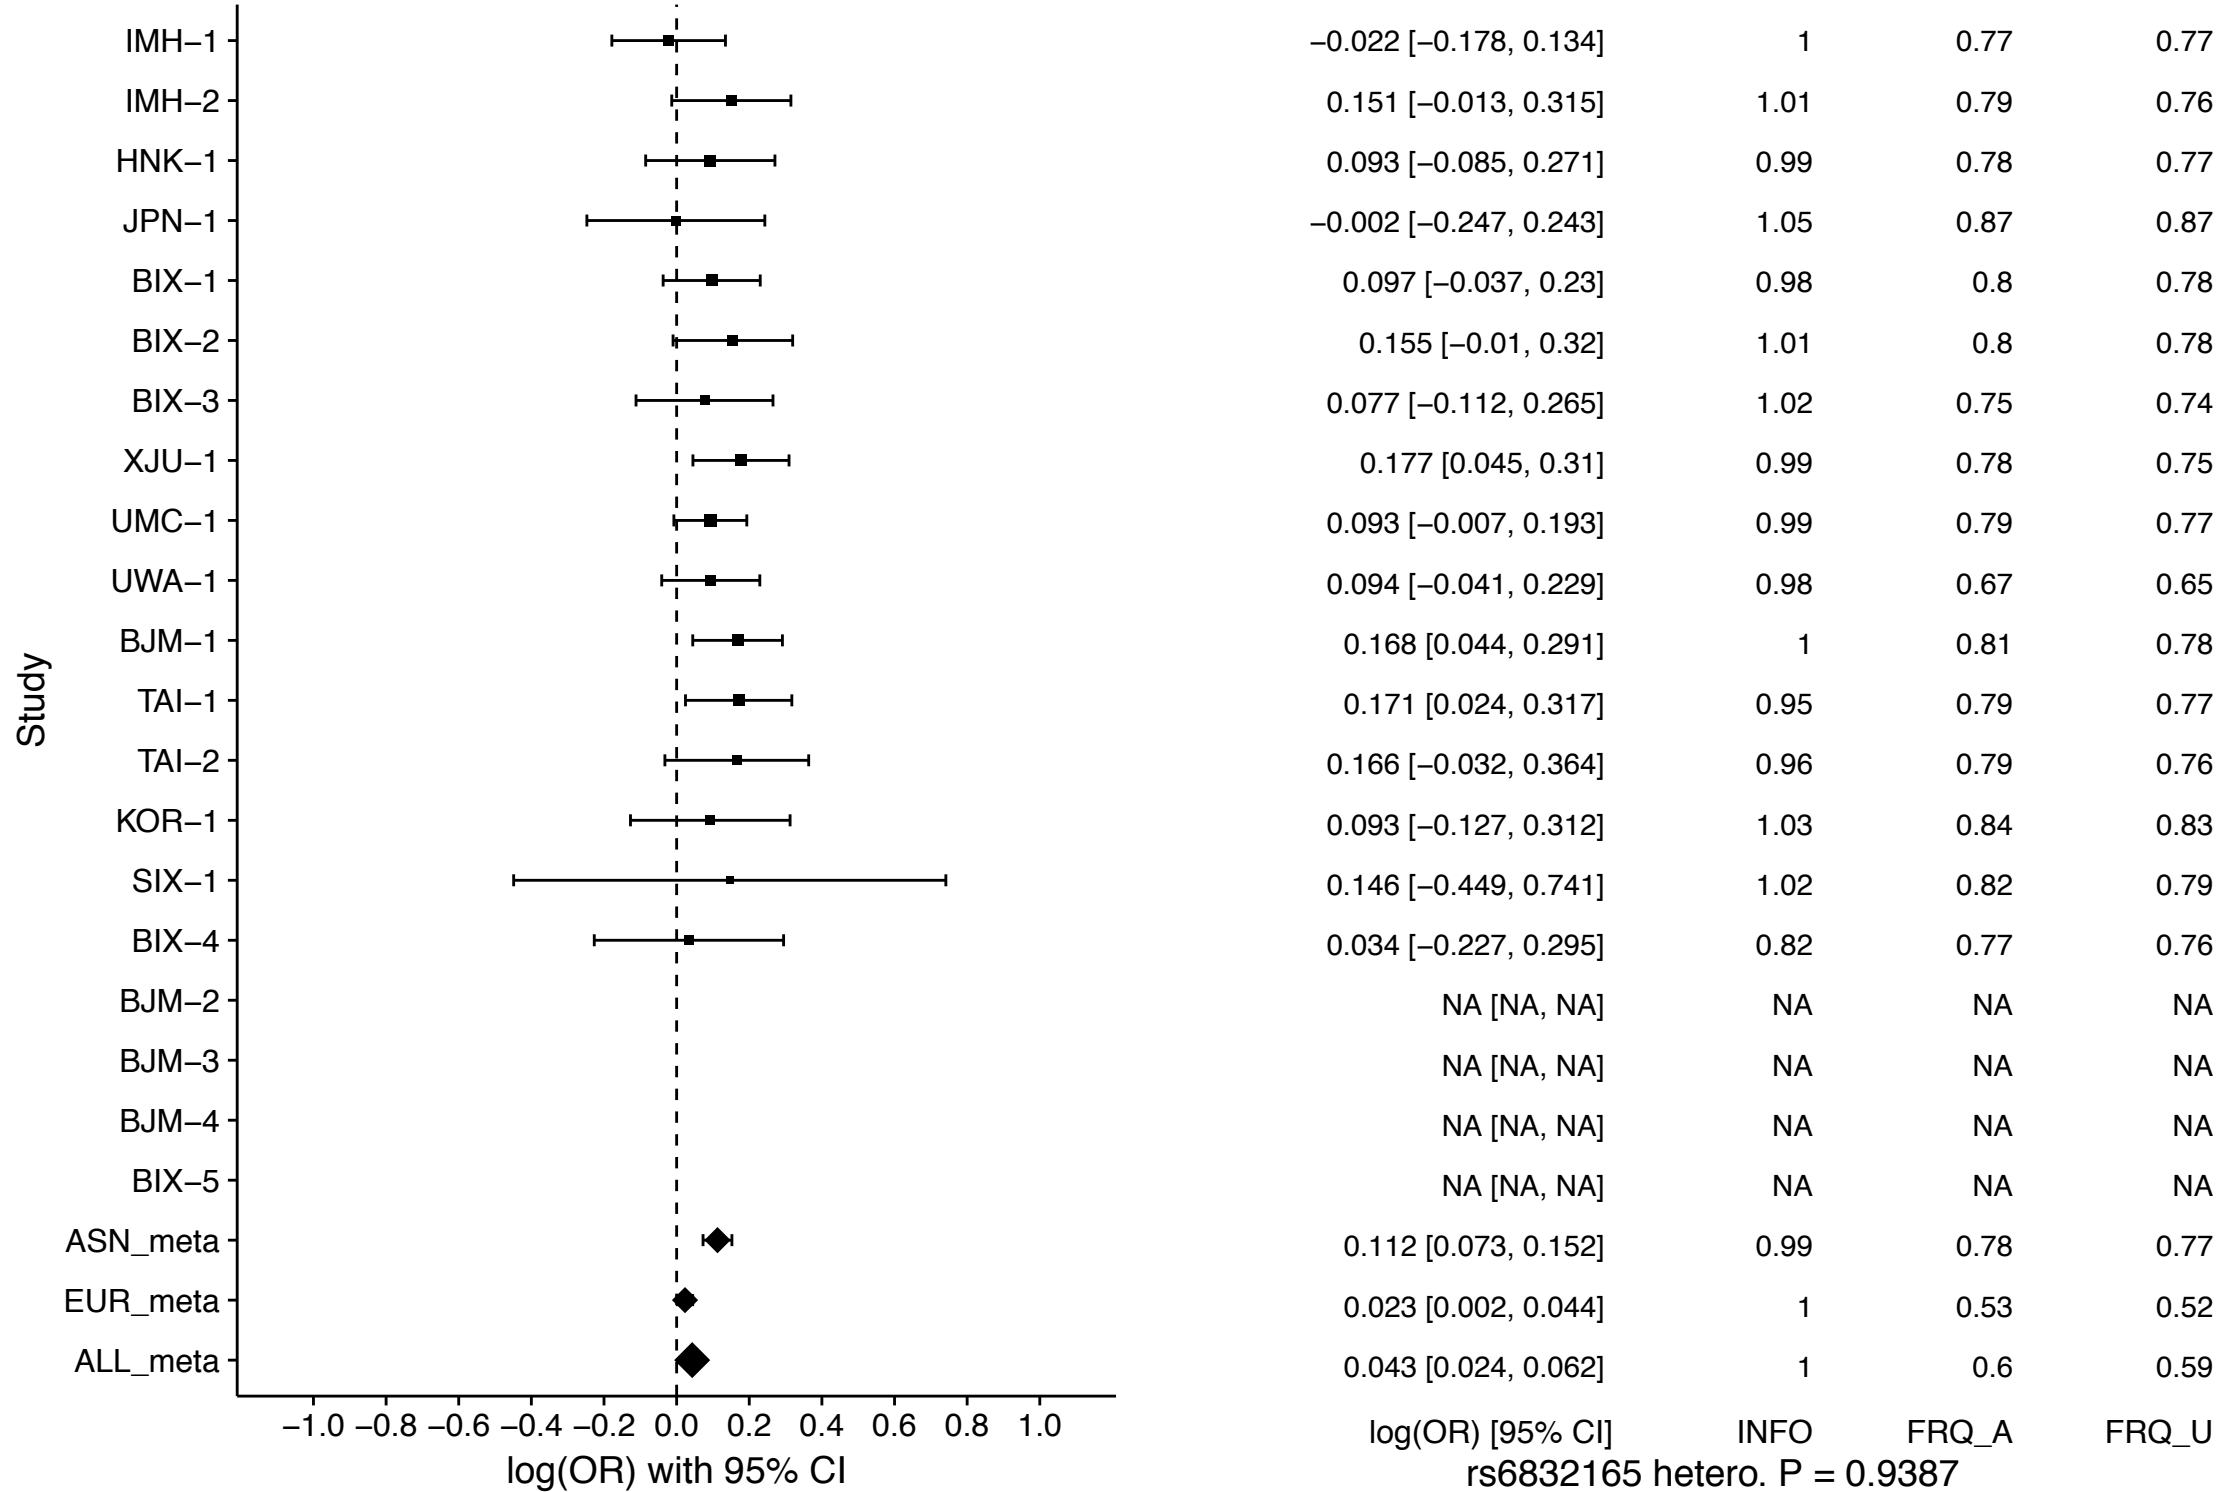

log(OR) [95% CI] INFO FRQ\_A FRQ\_U  
 rs6832165 hetero. P = 0.9387

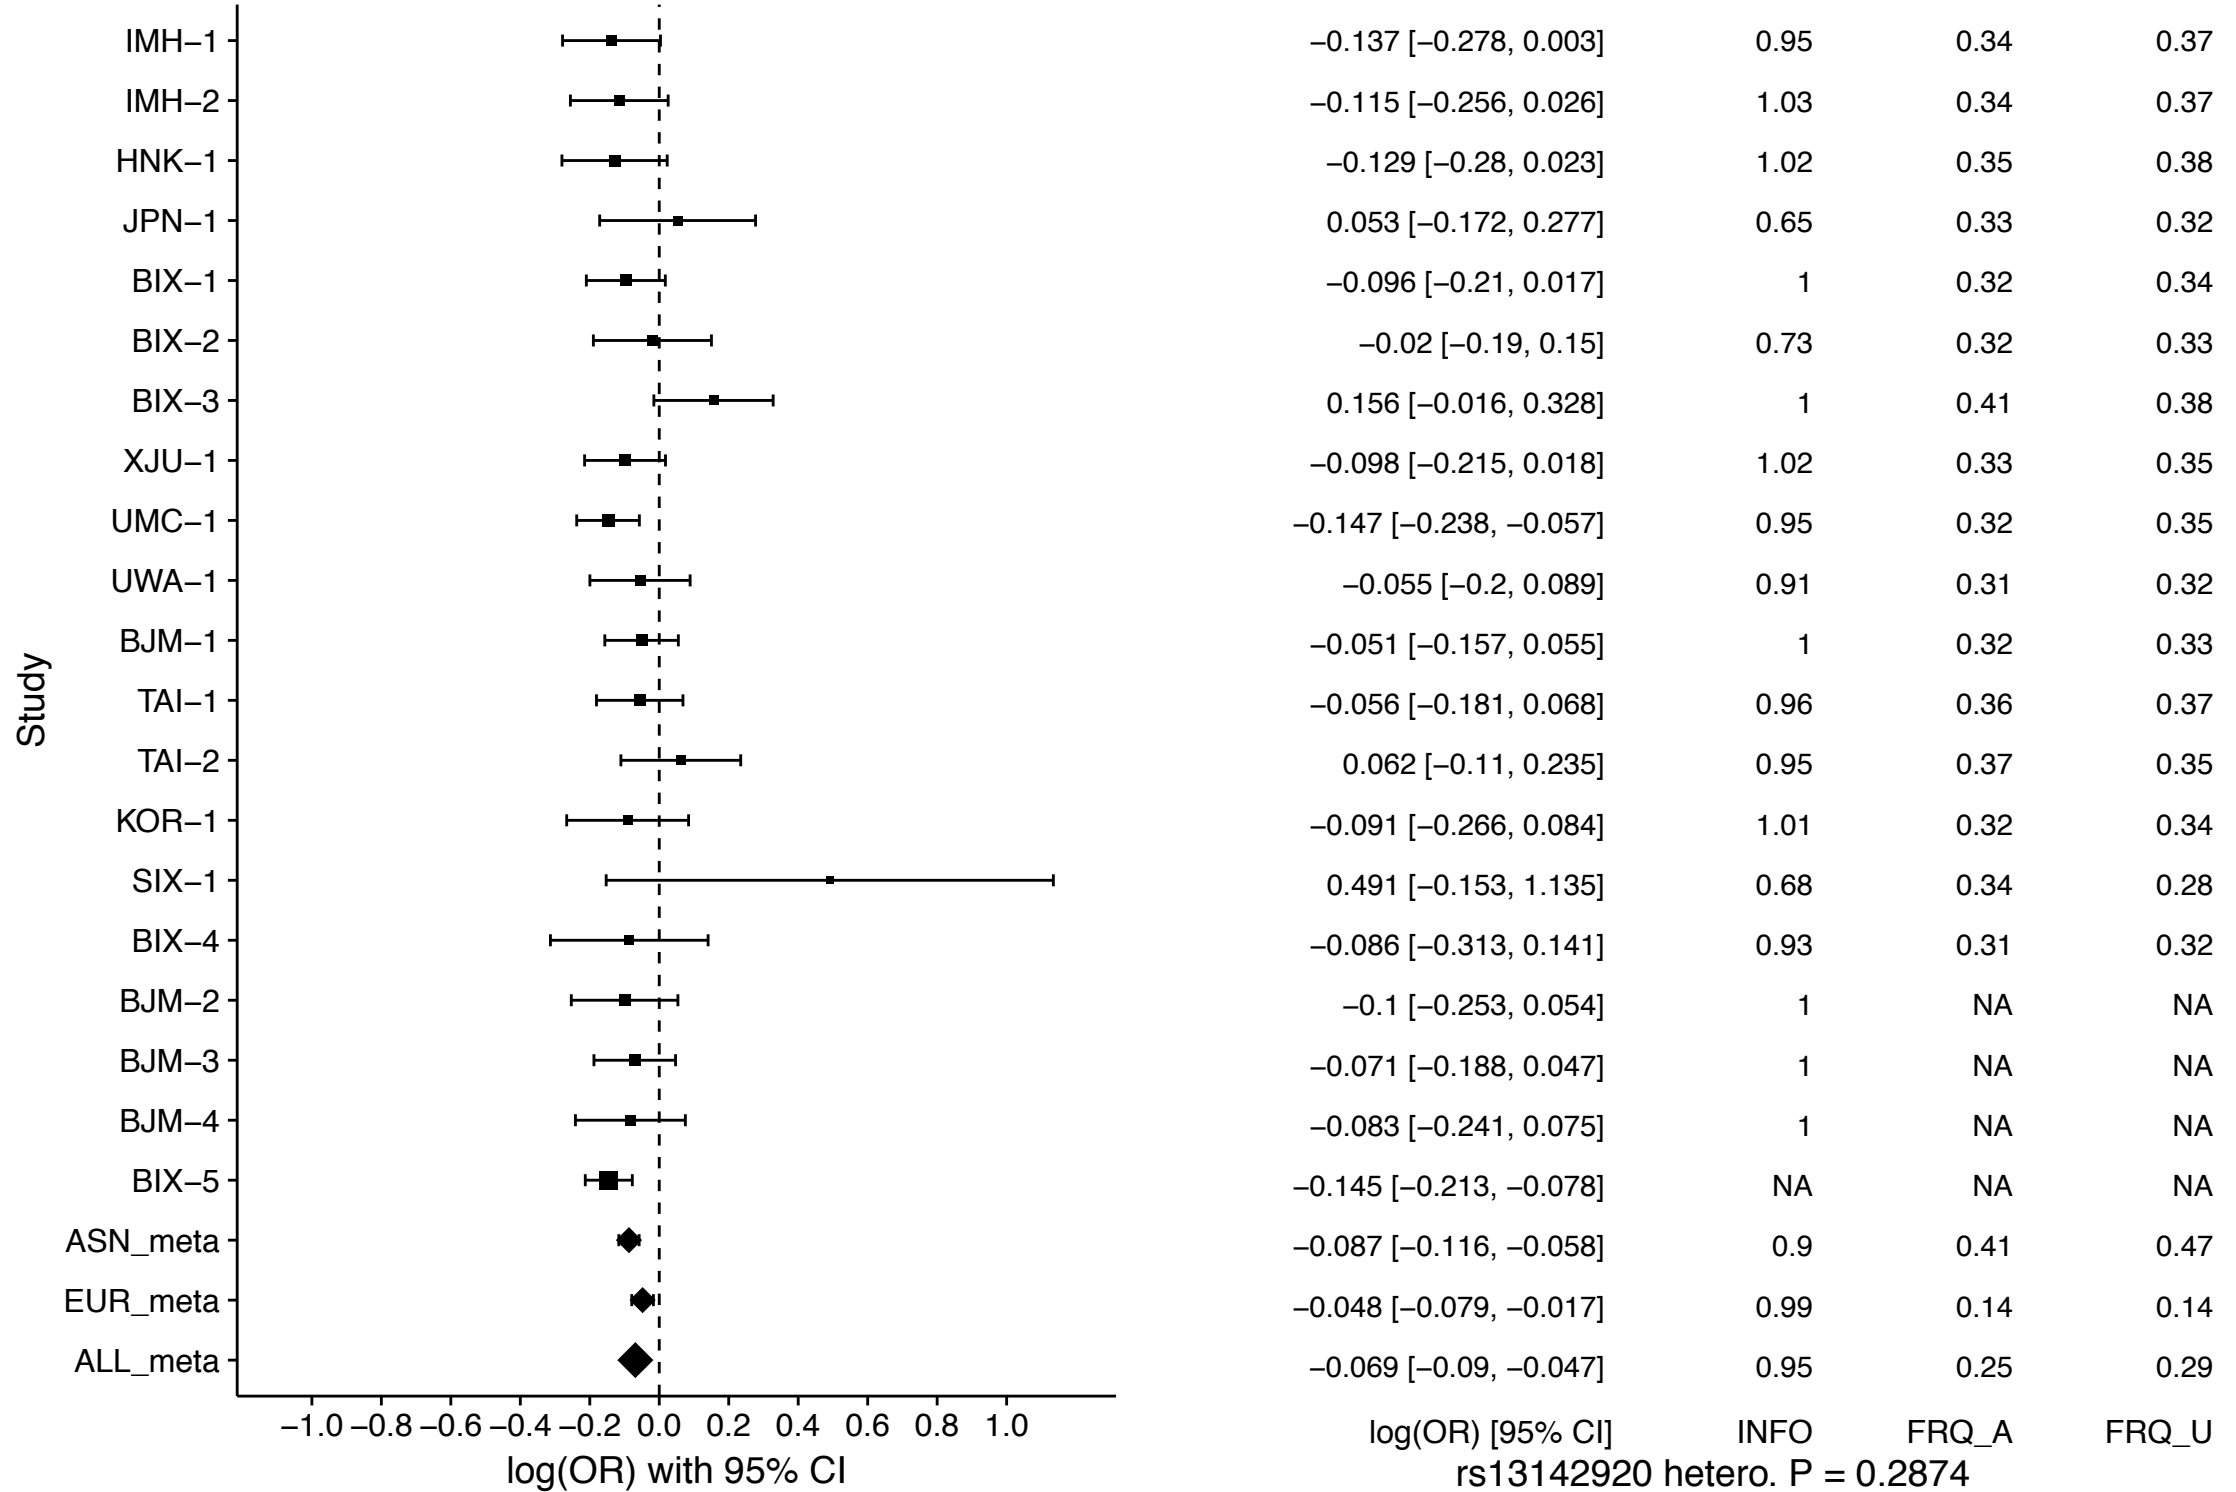

-1.0 -0.8 -0.6 -0.4 -0.2 0 0.2 0.4 0.6 0.8 1.0

log(OR) with 95% CI

log(OR) [95% CI]

INFO

FRQ\_A

FRQ\_U

rs13142920 hetero. P = 0.2874

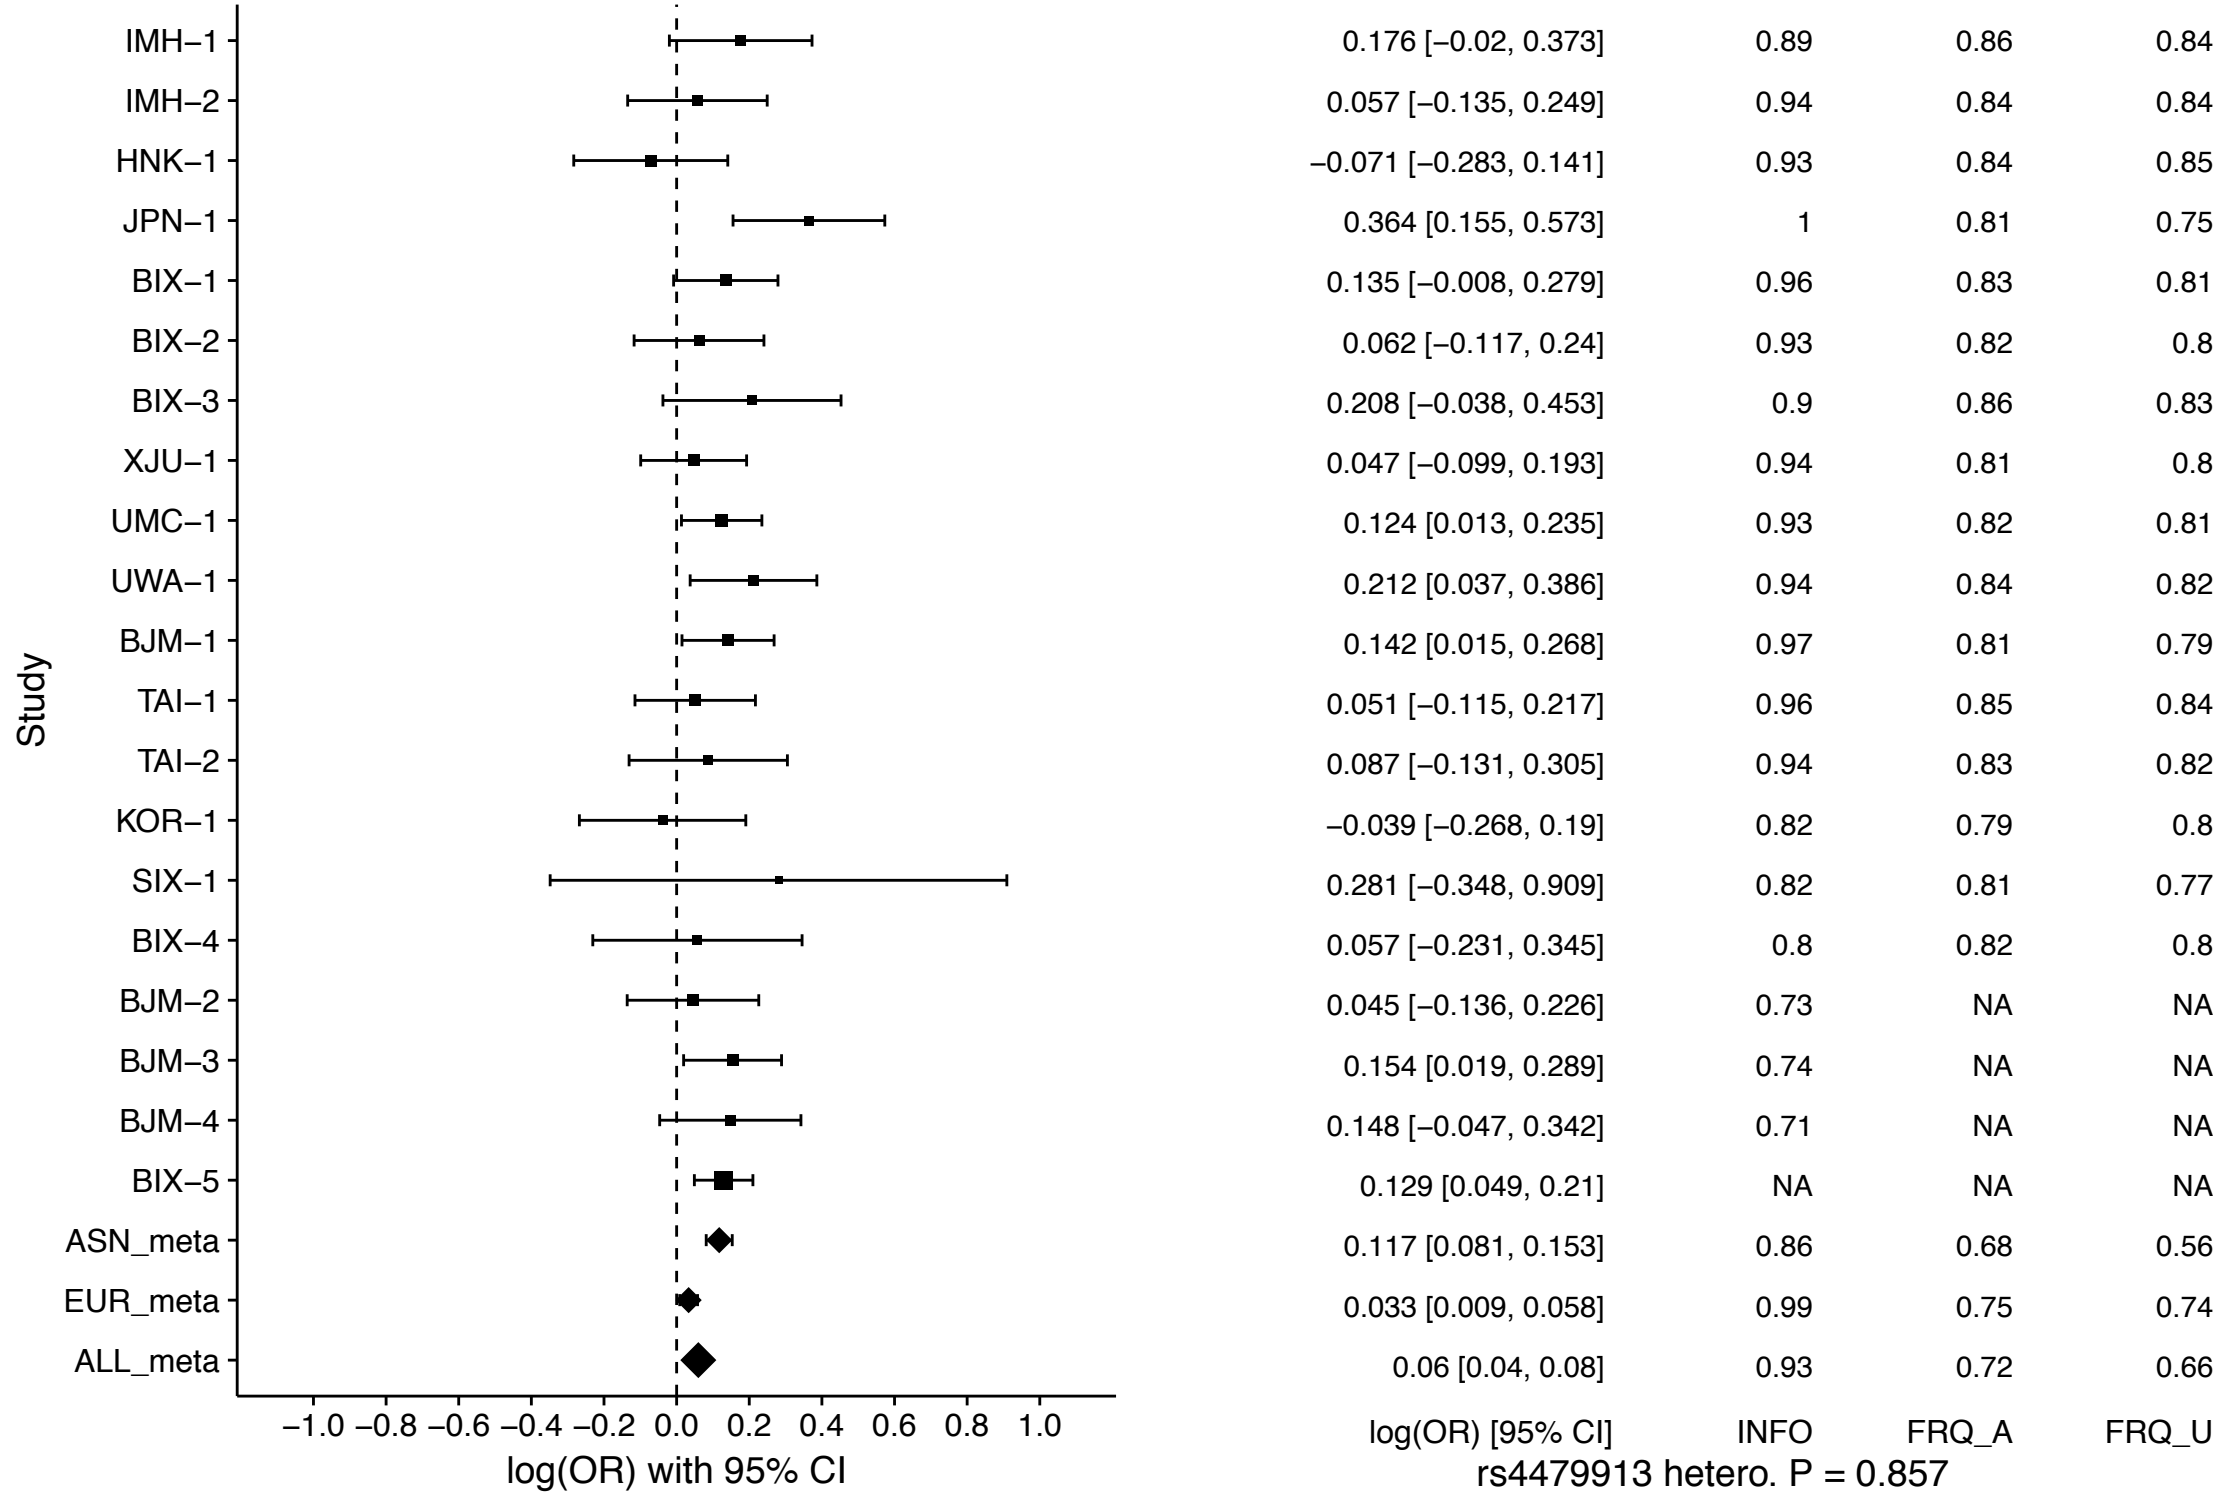

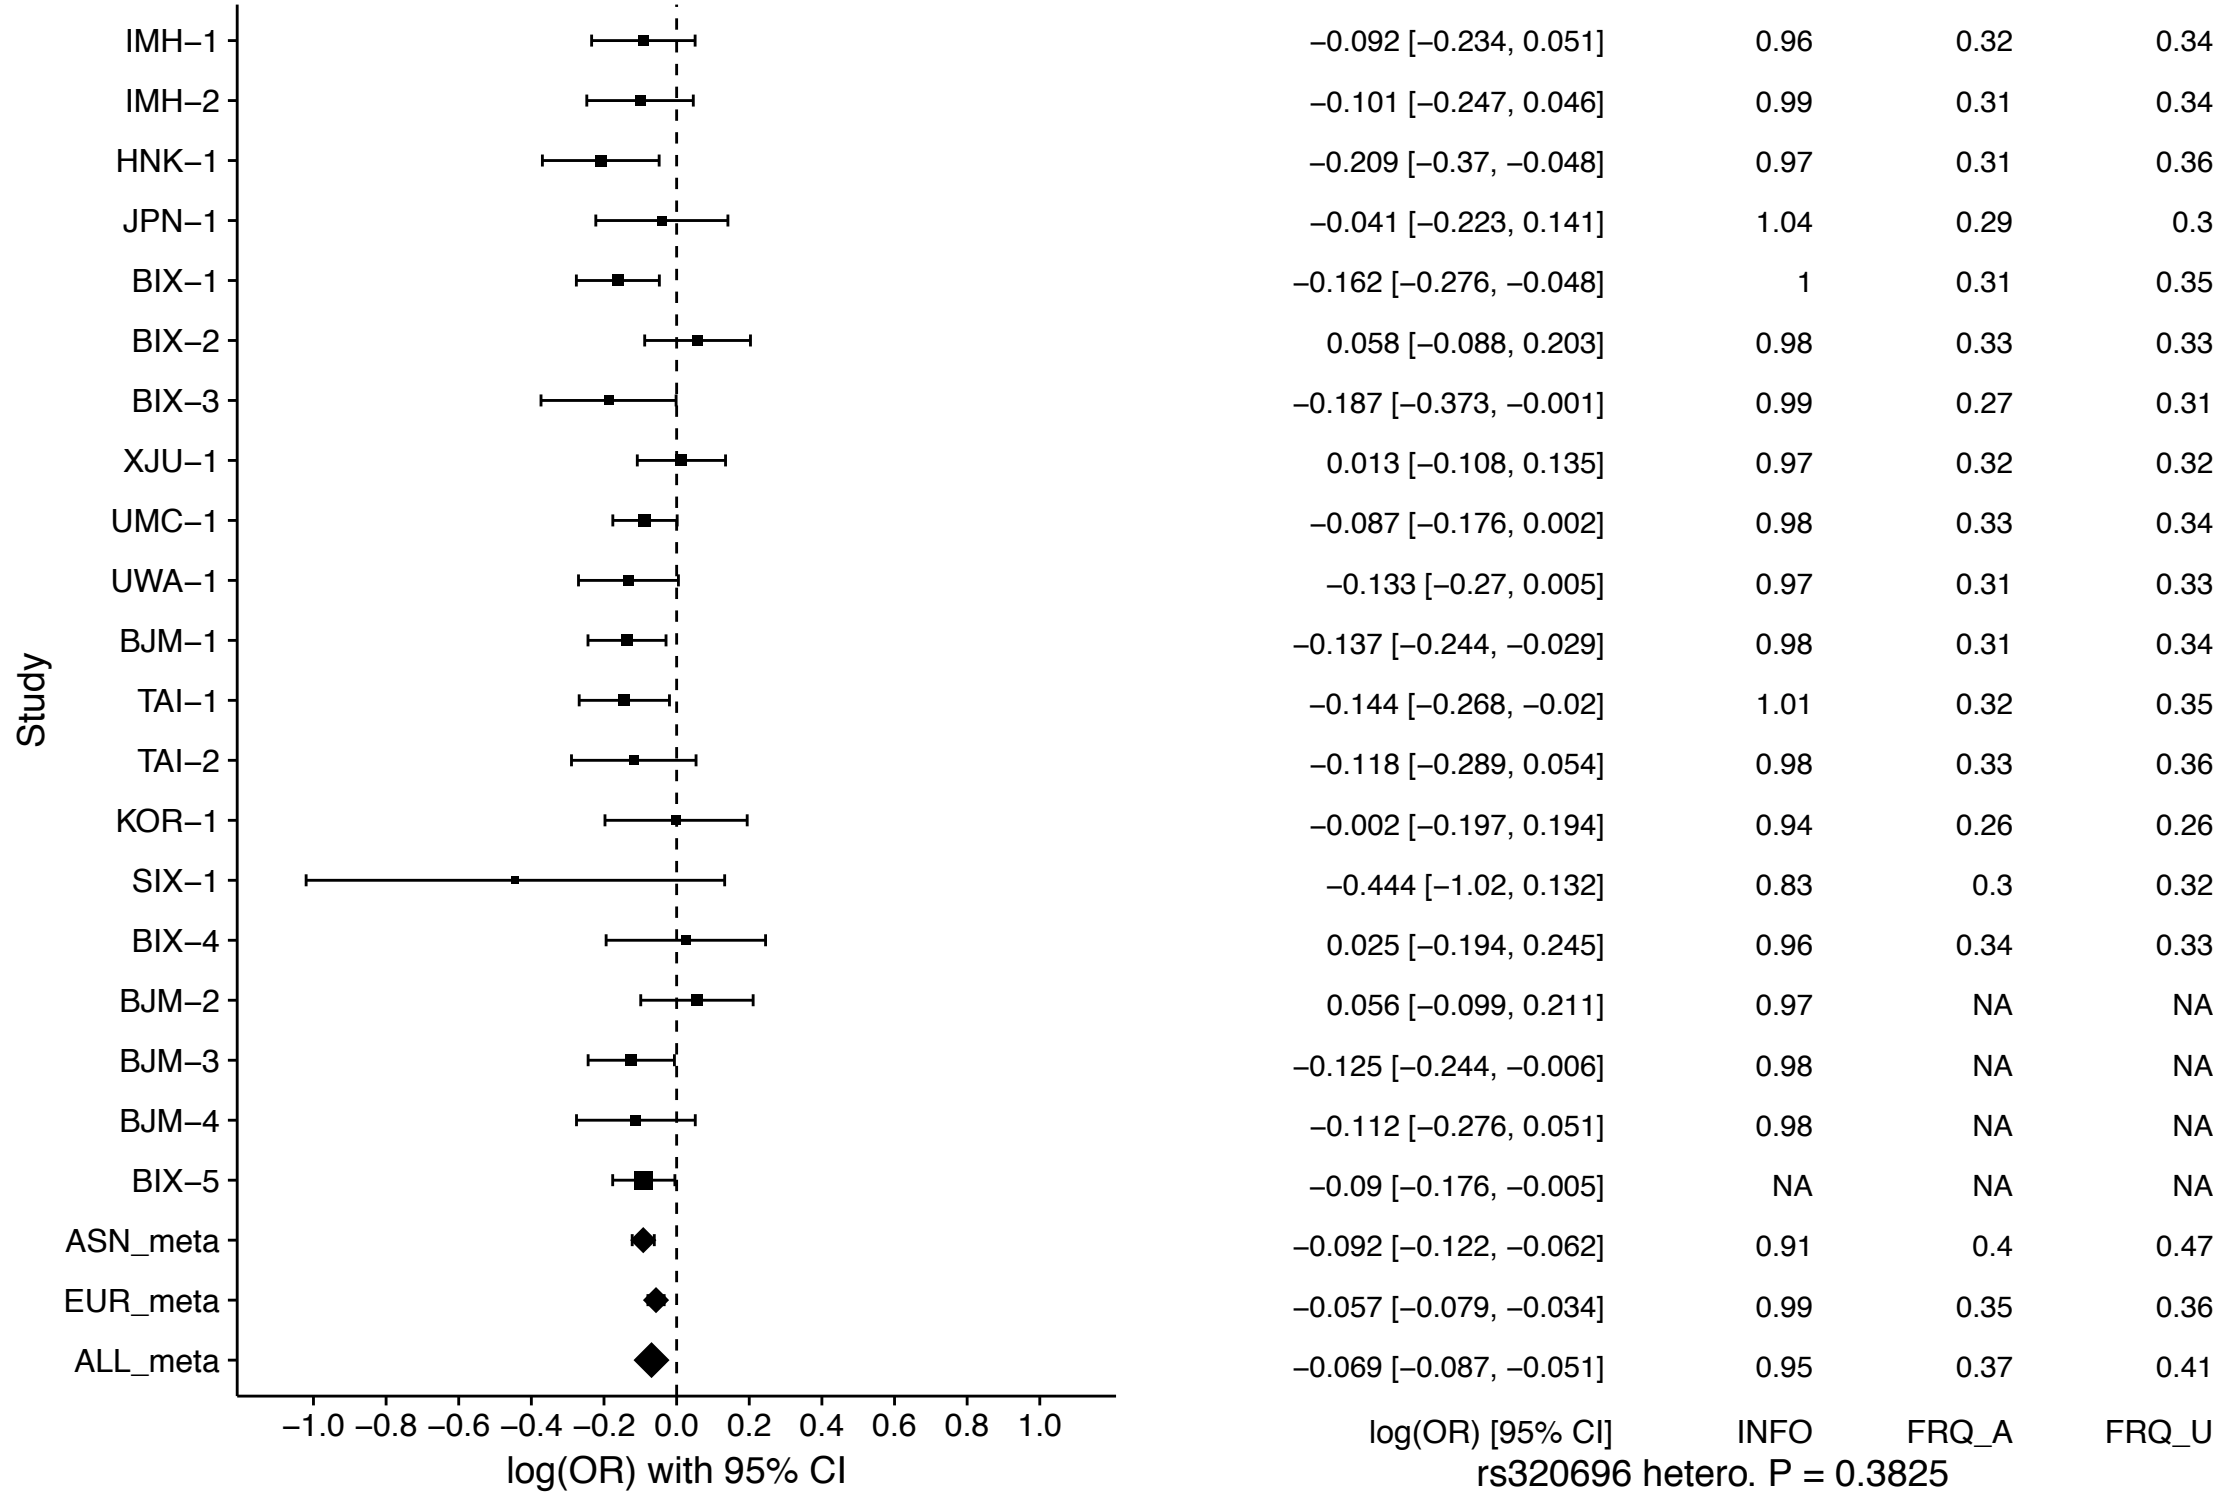

log(OR) [95% CI] INFO FRQ\_A FRQ\_U  
rs320696 hetero. P = 0.3825

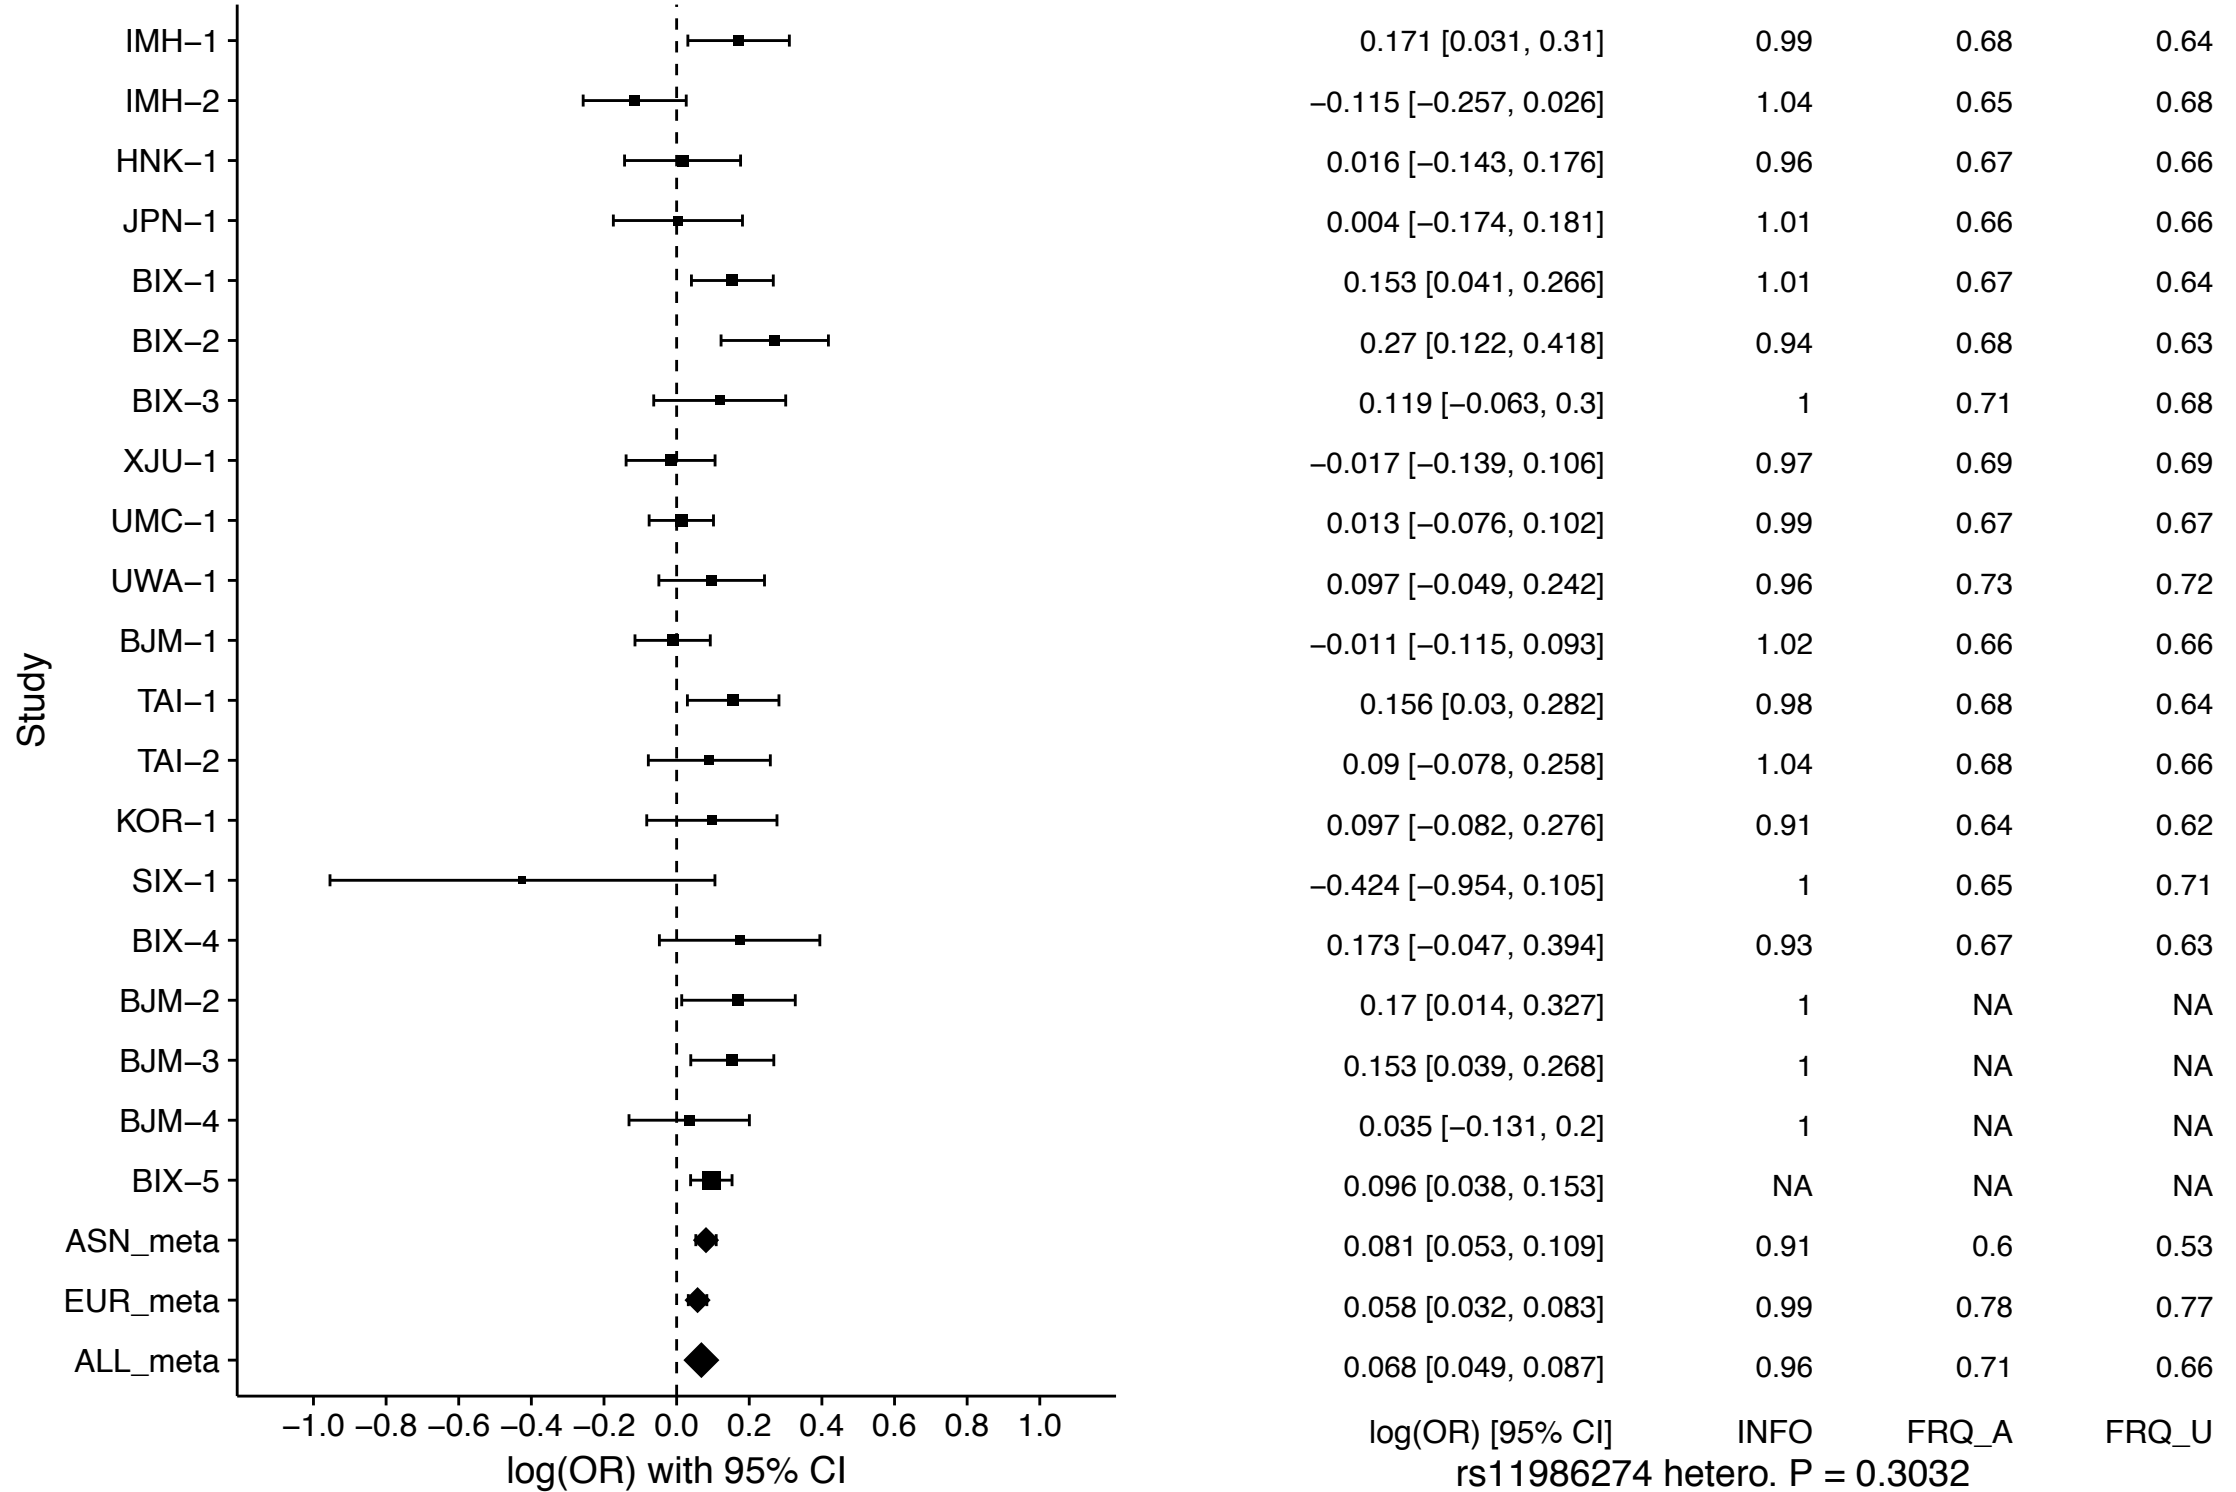

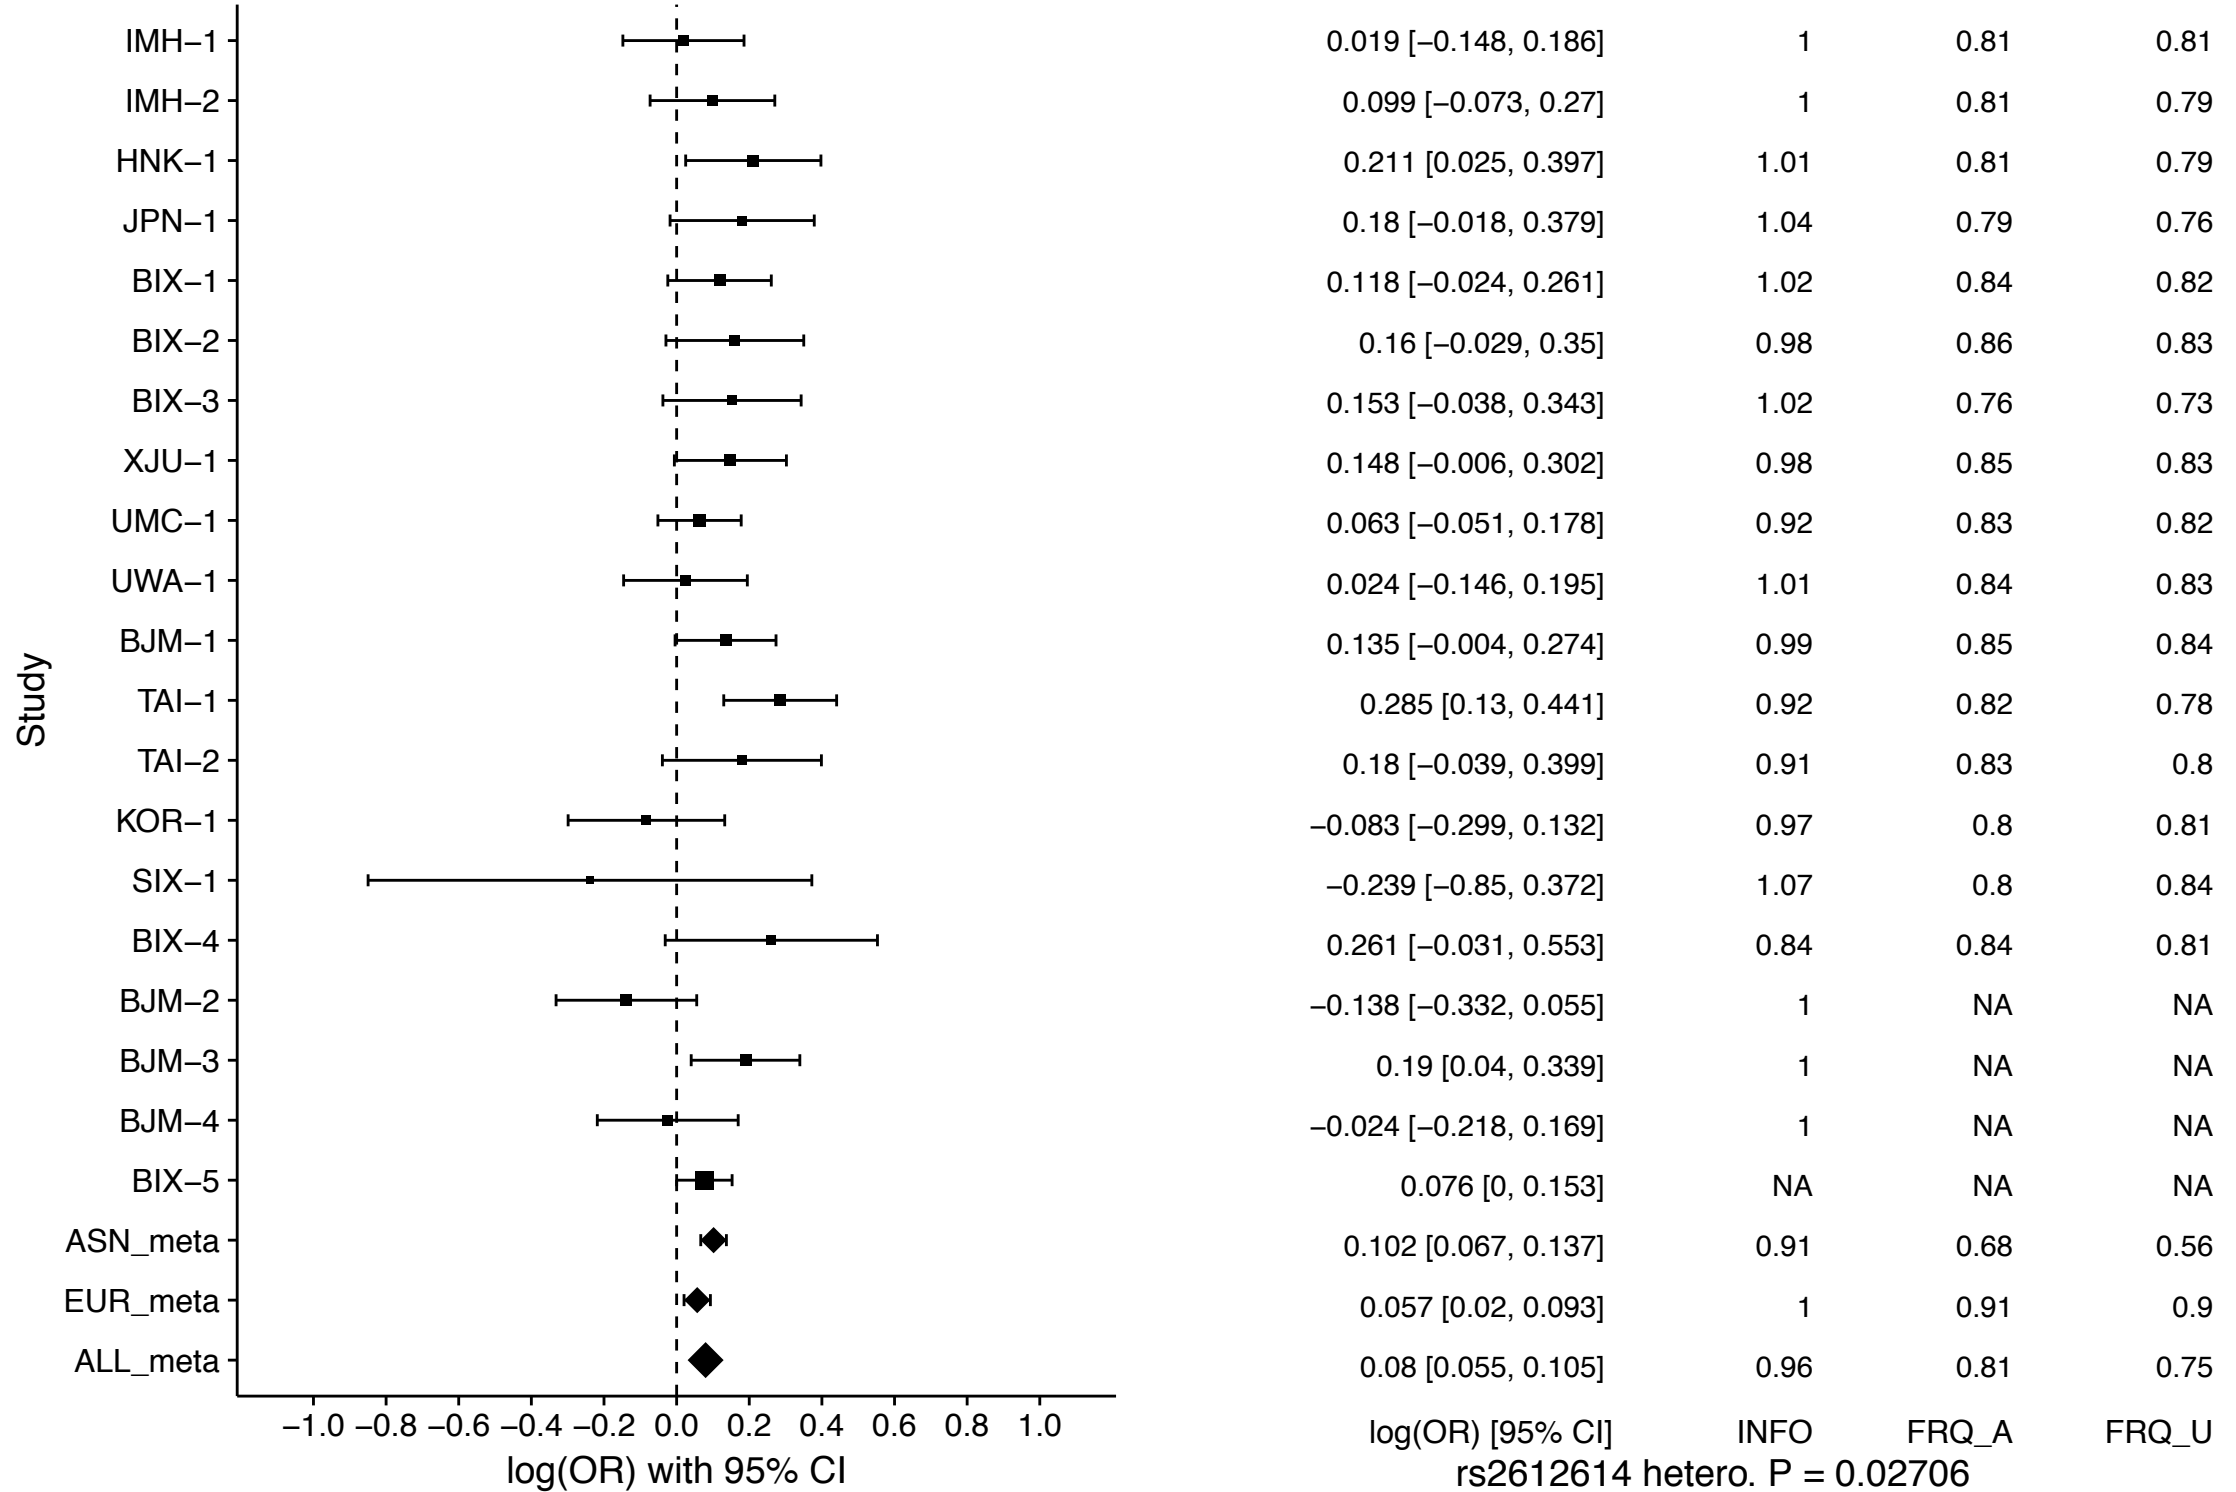

log(OR) [95% CI] INFO FRQ\_A FRQ\_U  
 rs2612614 hetero. P = 0.02706

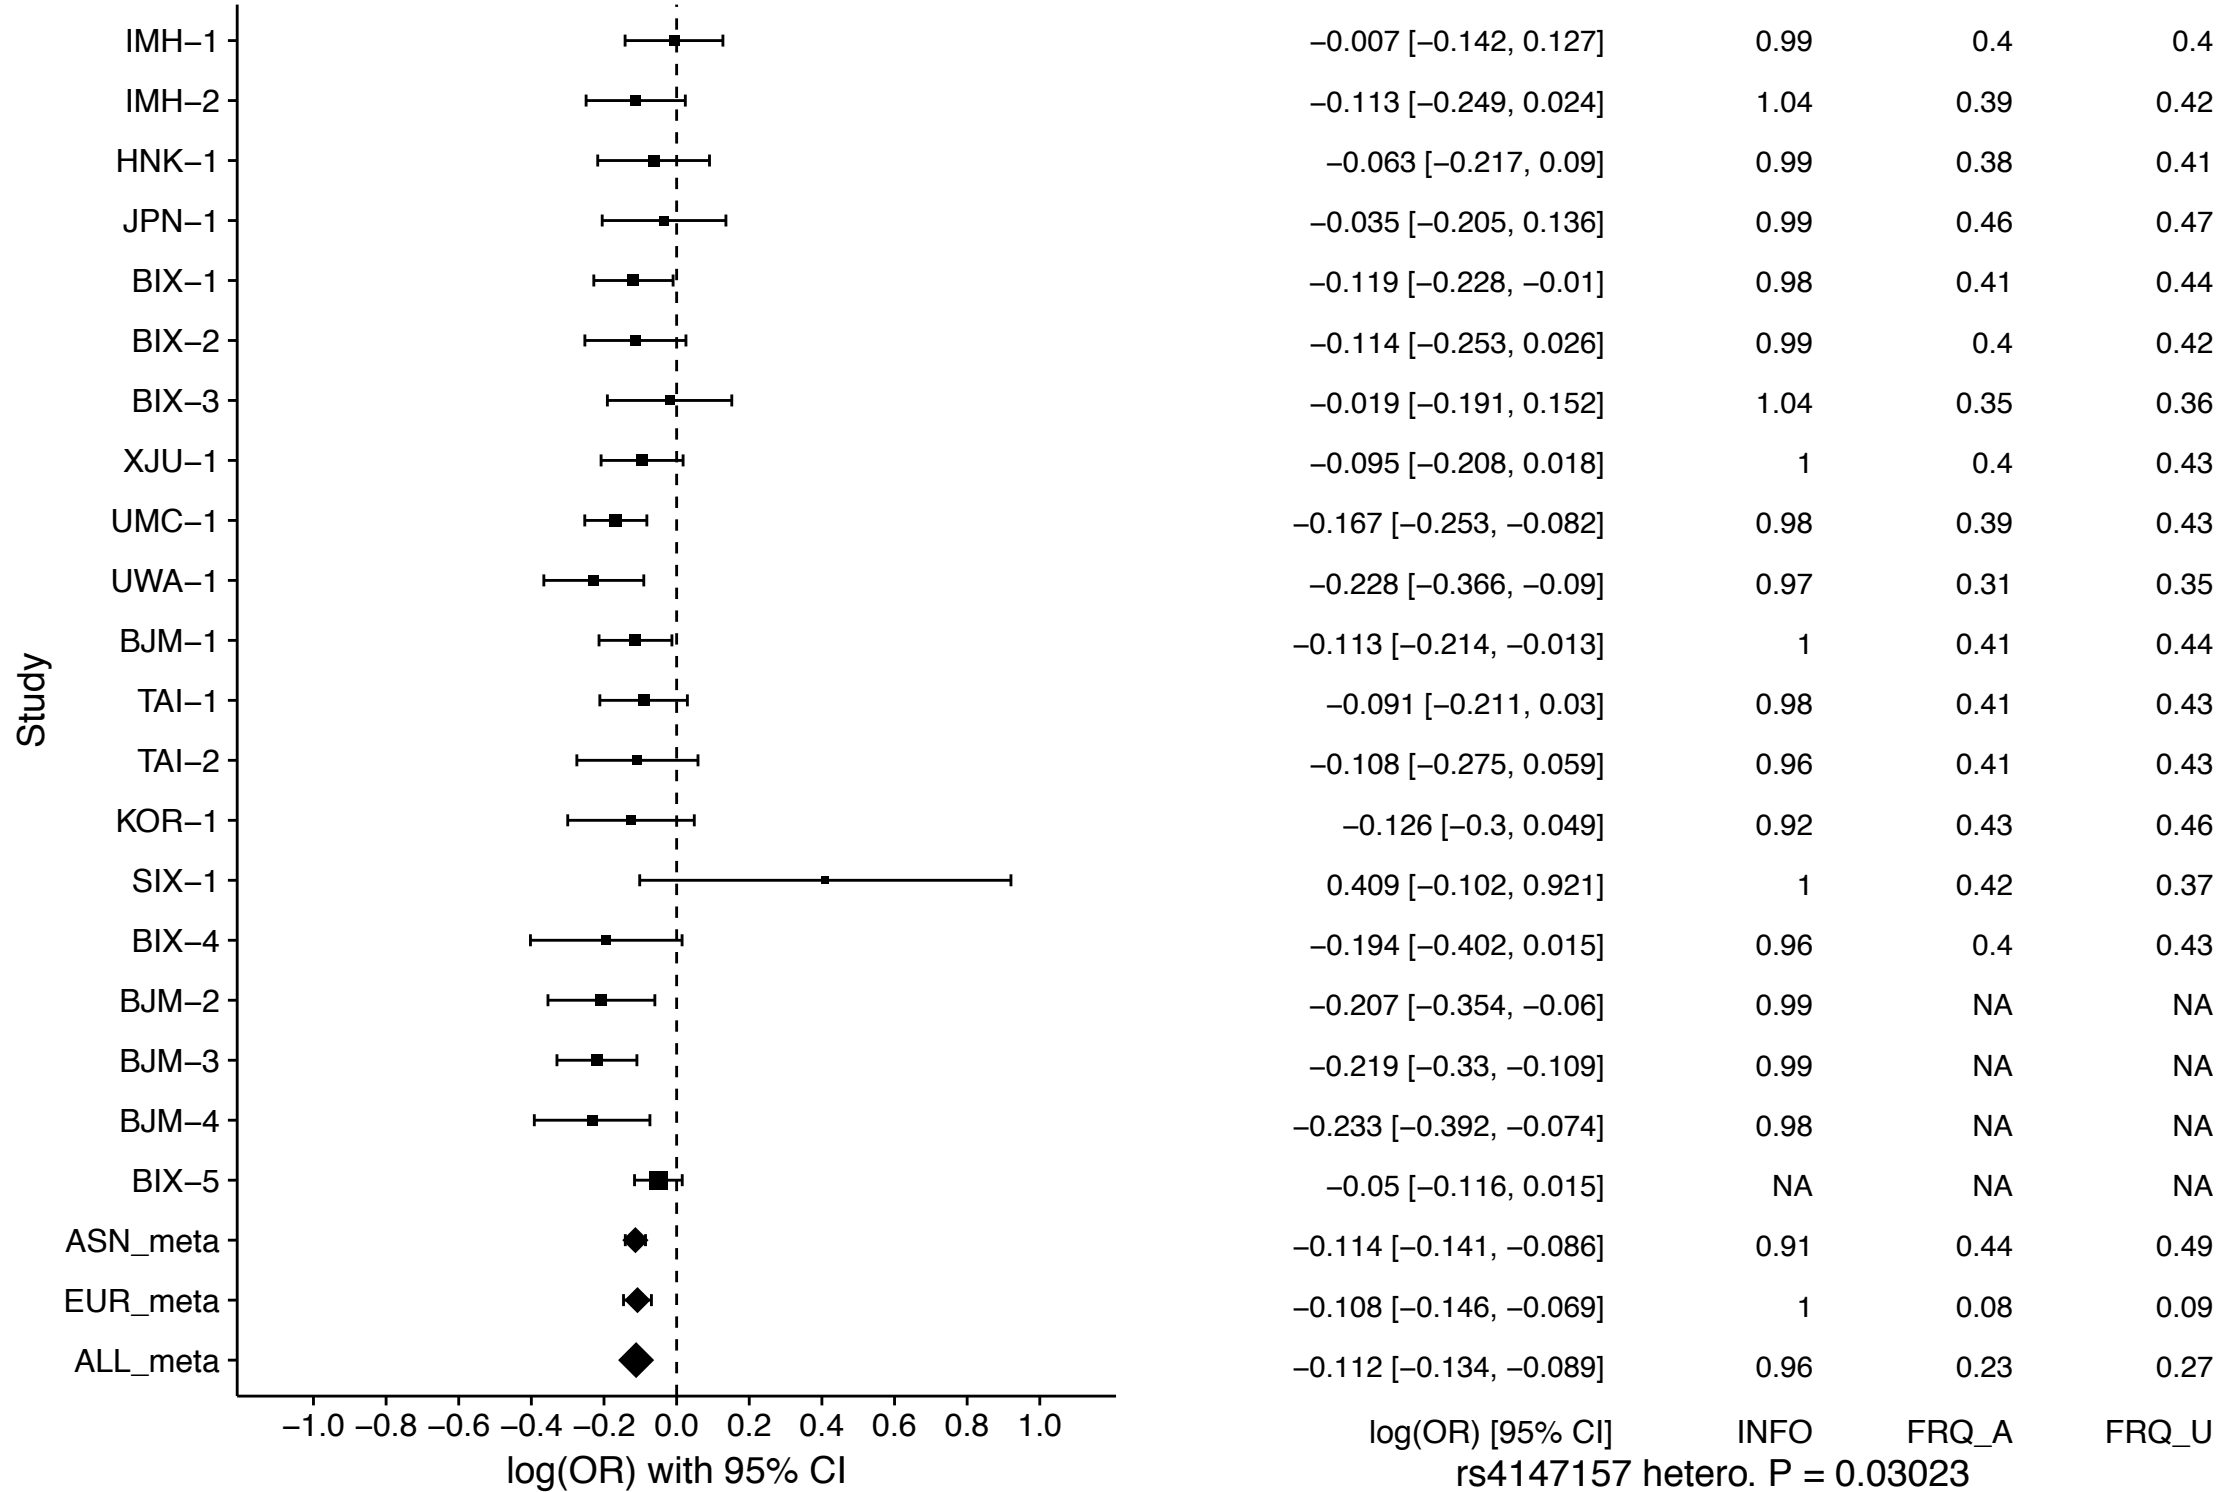

rs4147157 hetero. P = 0.03023

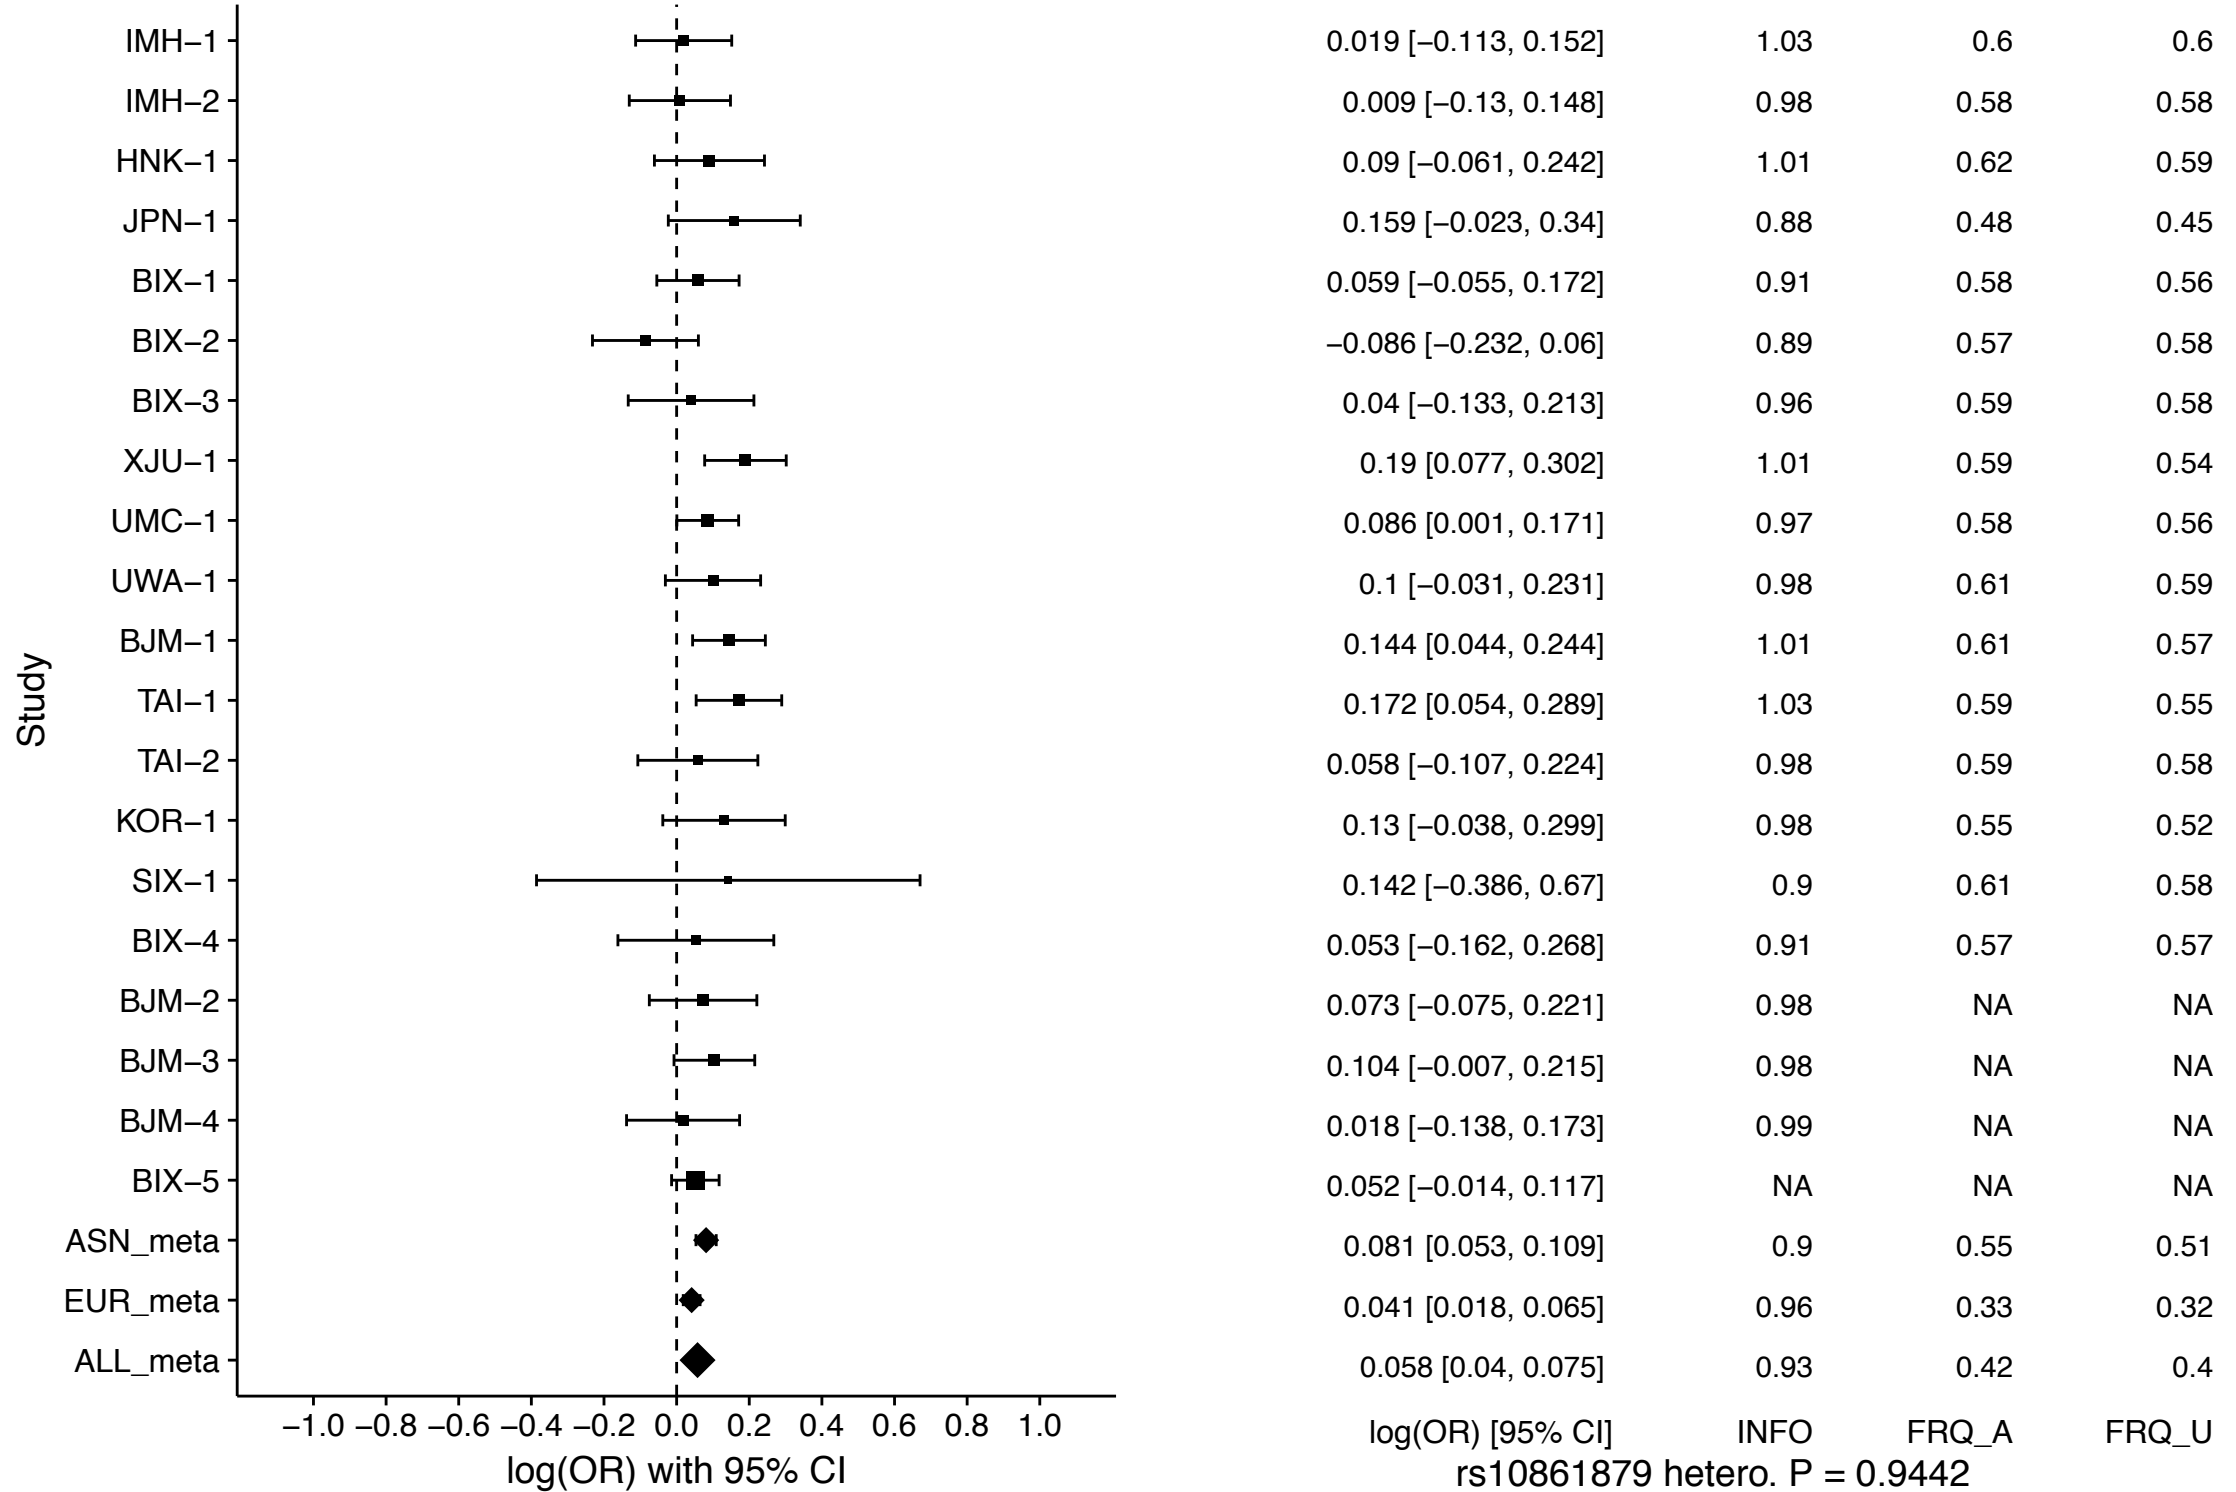



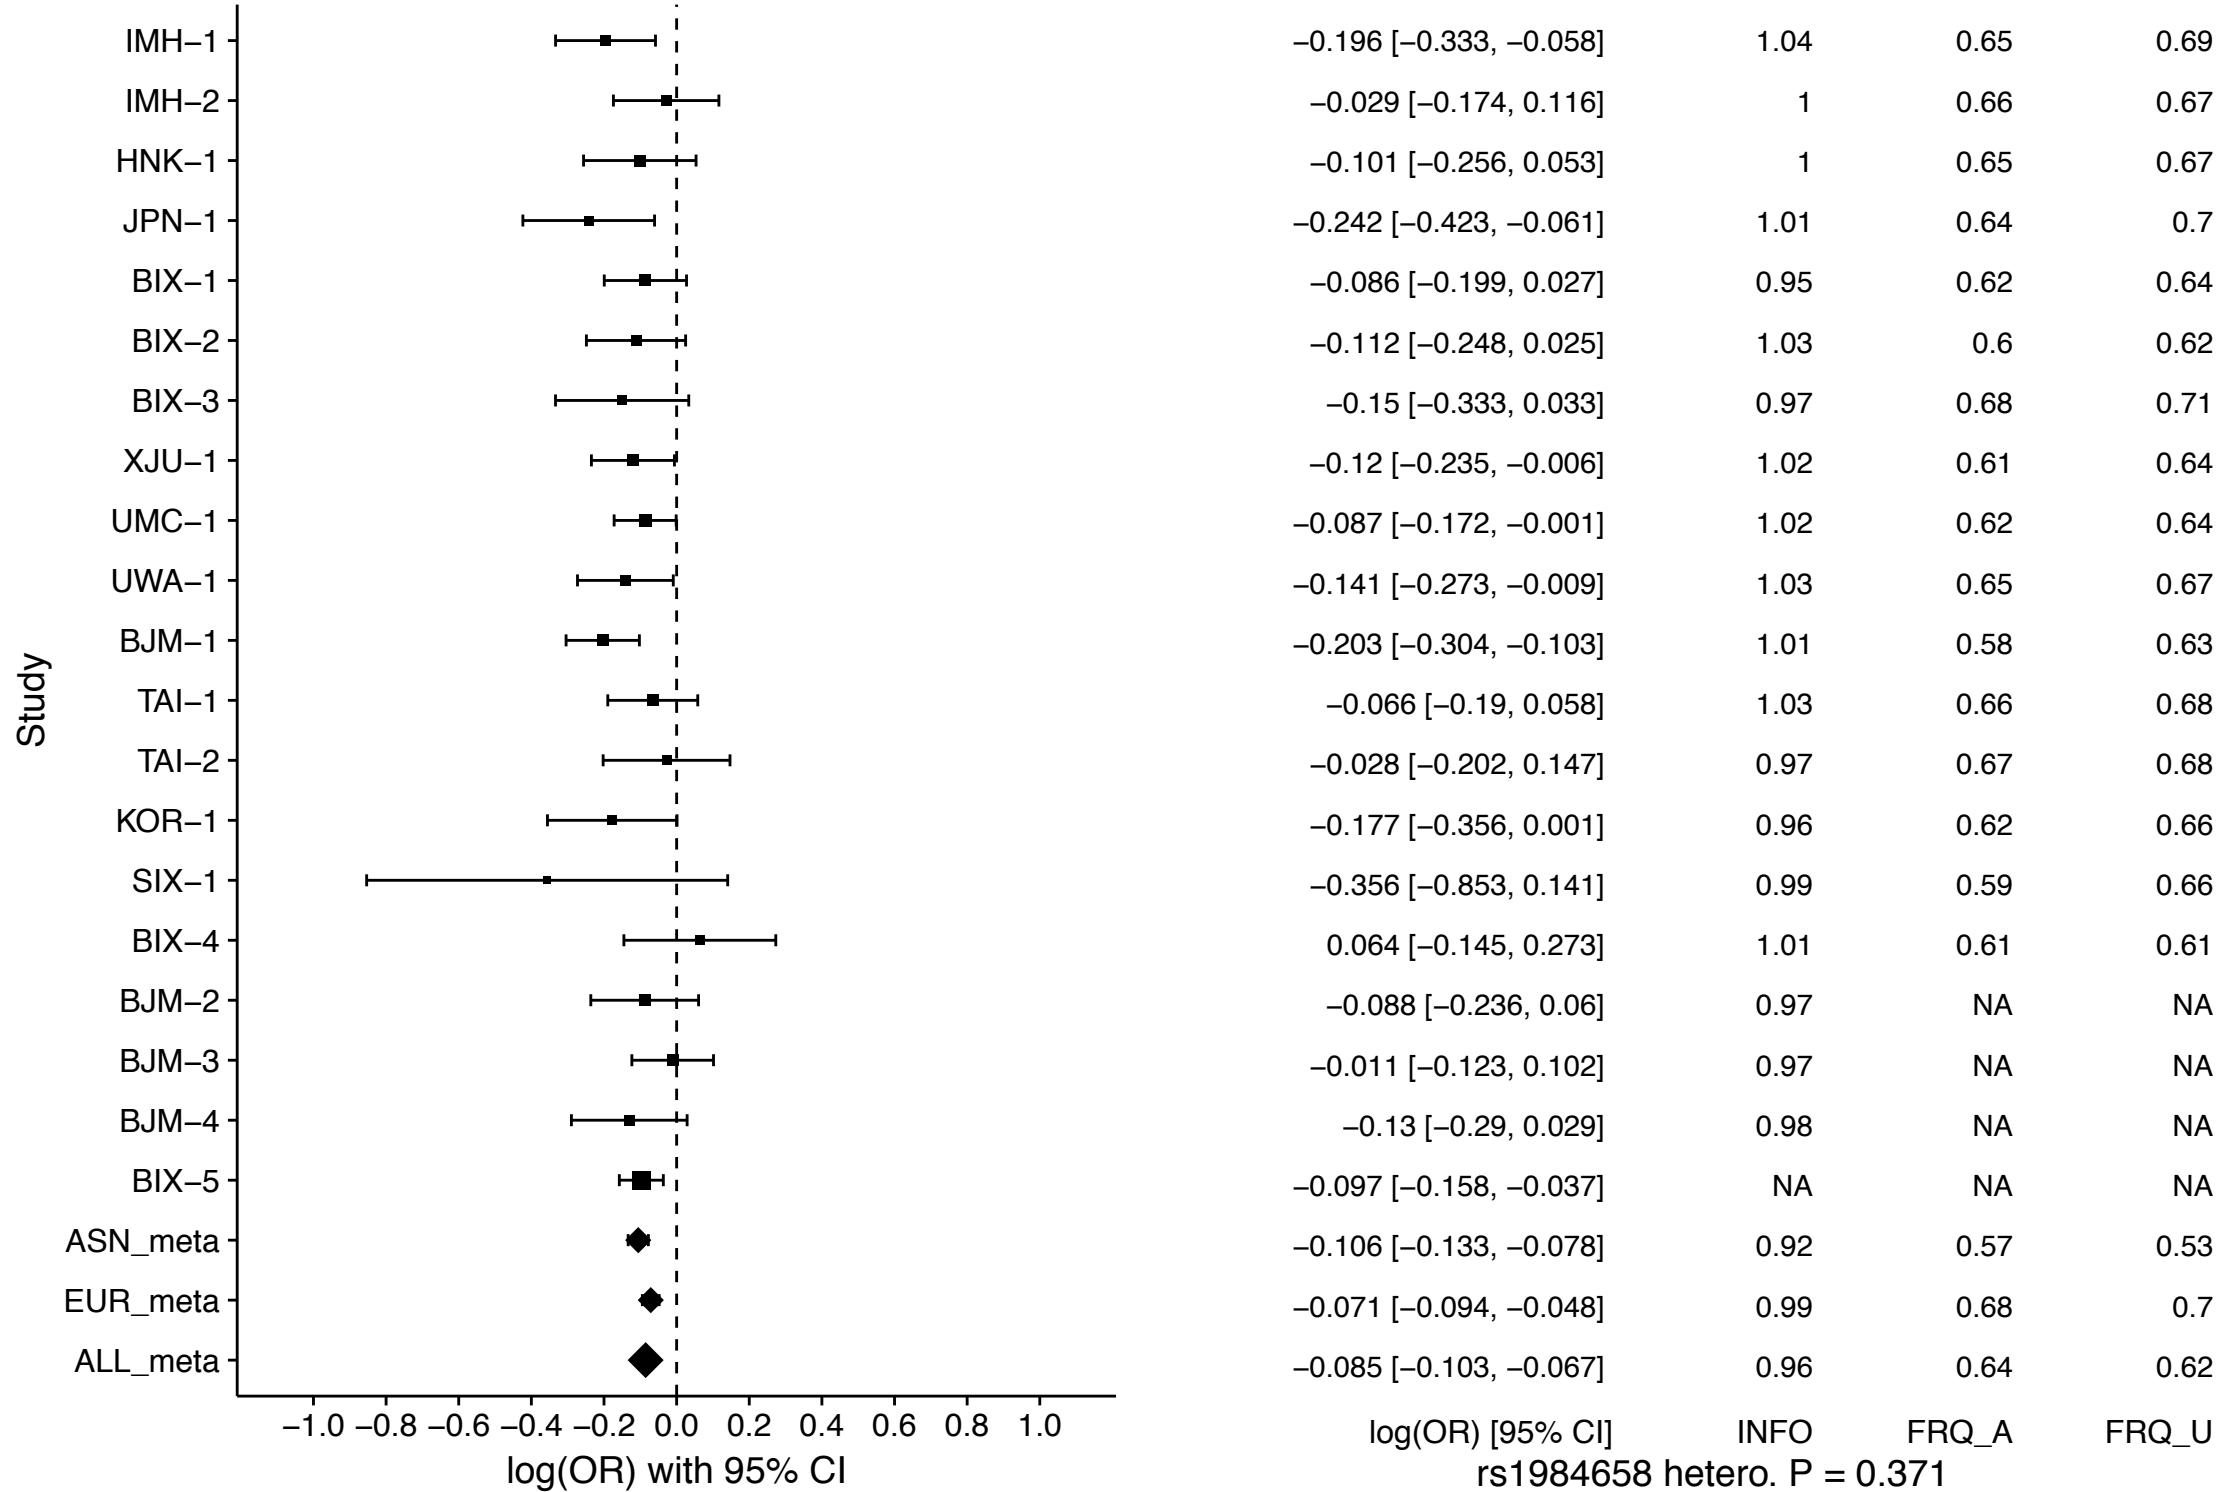

log(OR) [95% CI] INFO FRQ\_A FRQ\_U  
 rs1984658 hetero. P = 0.371

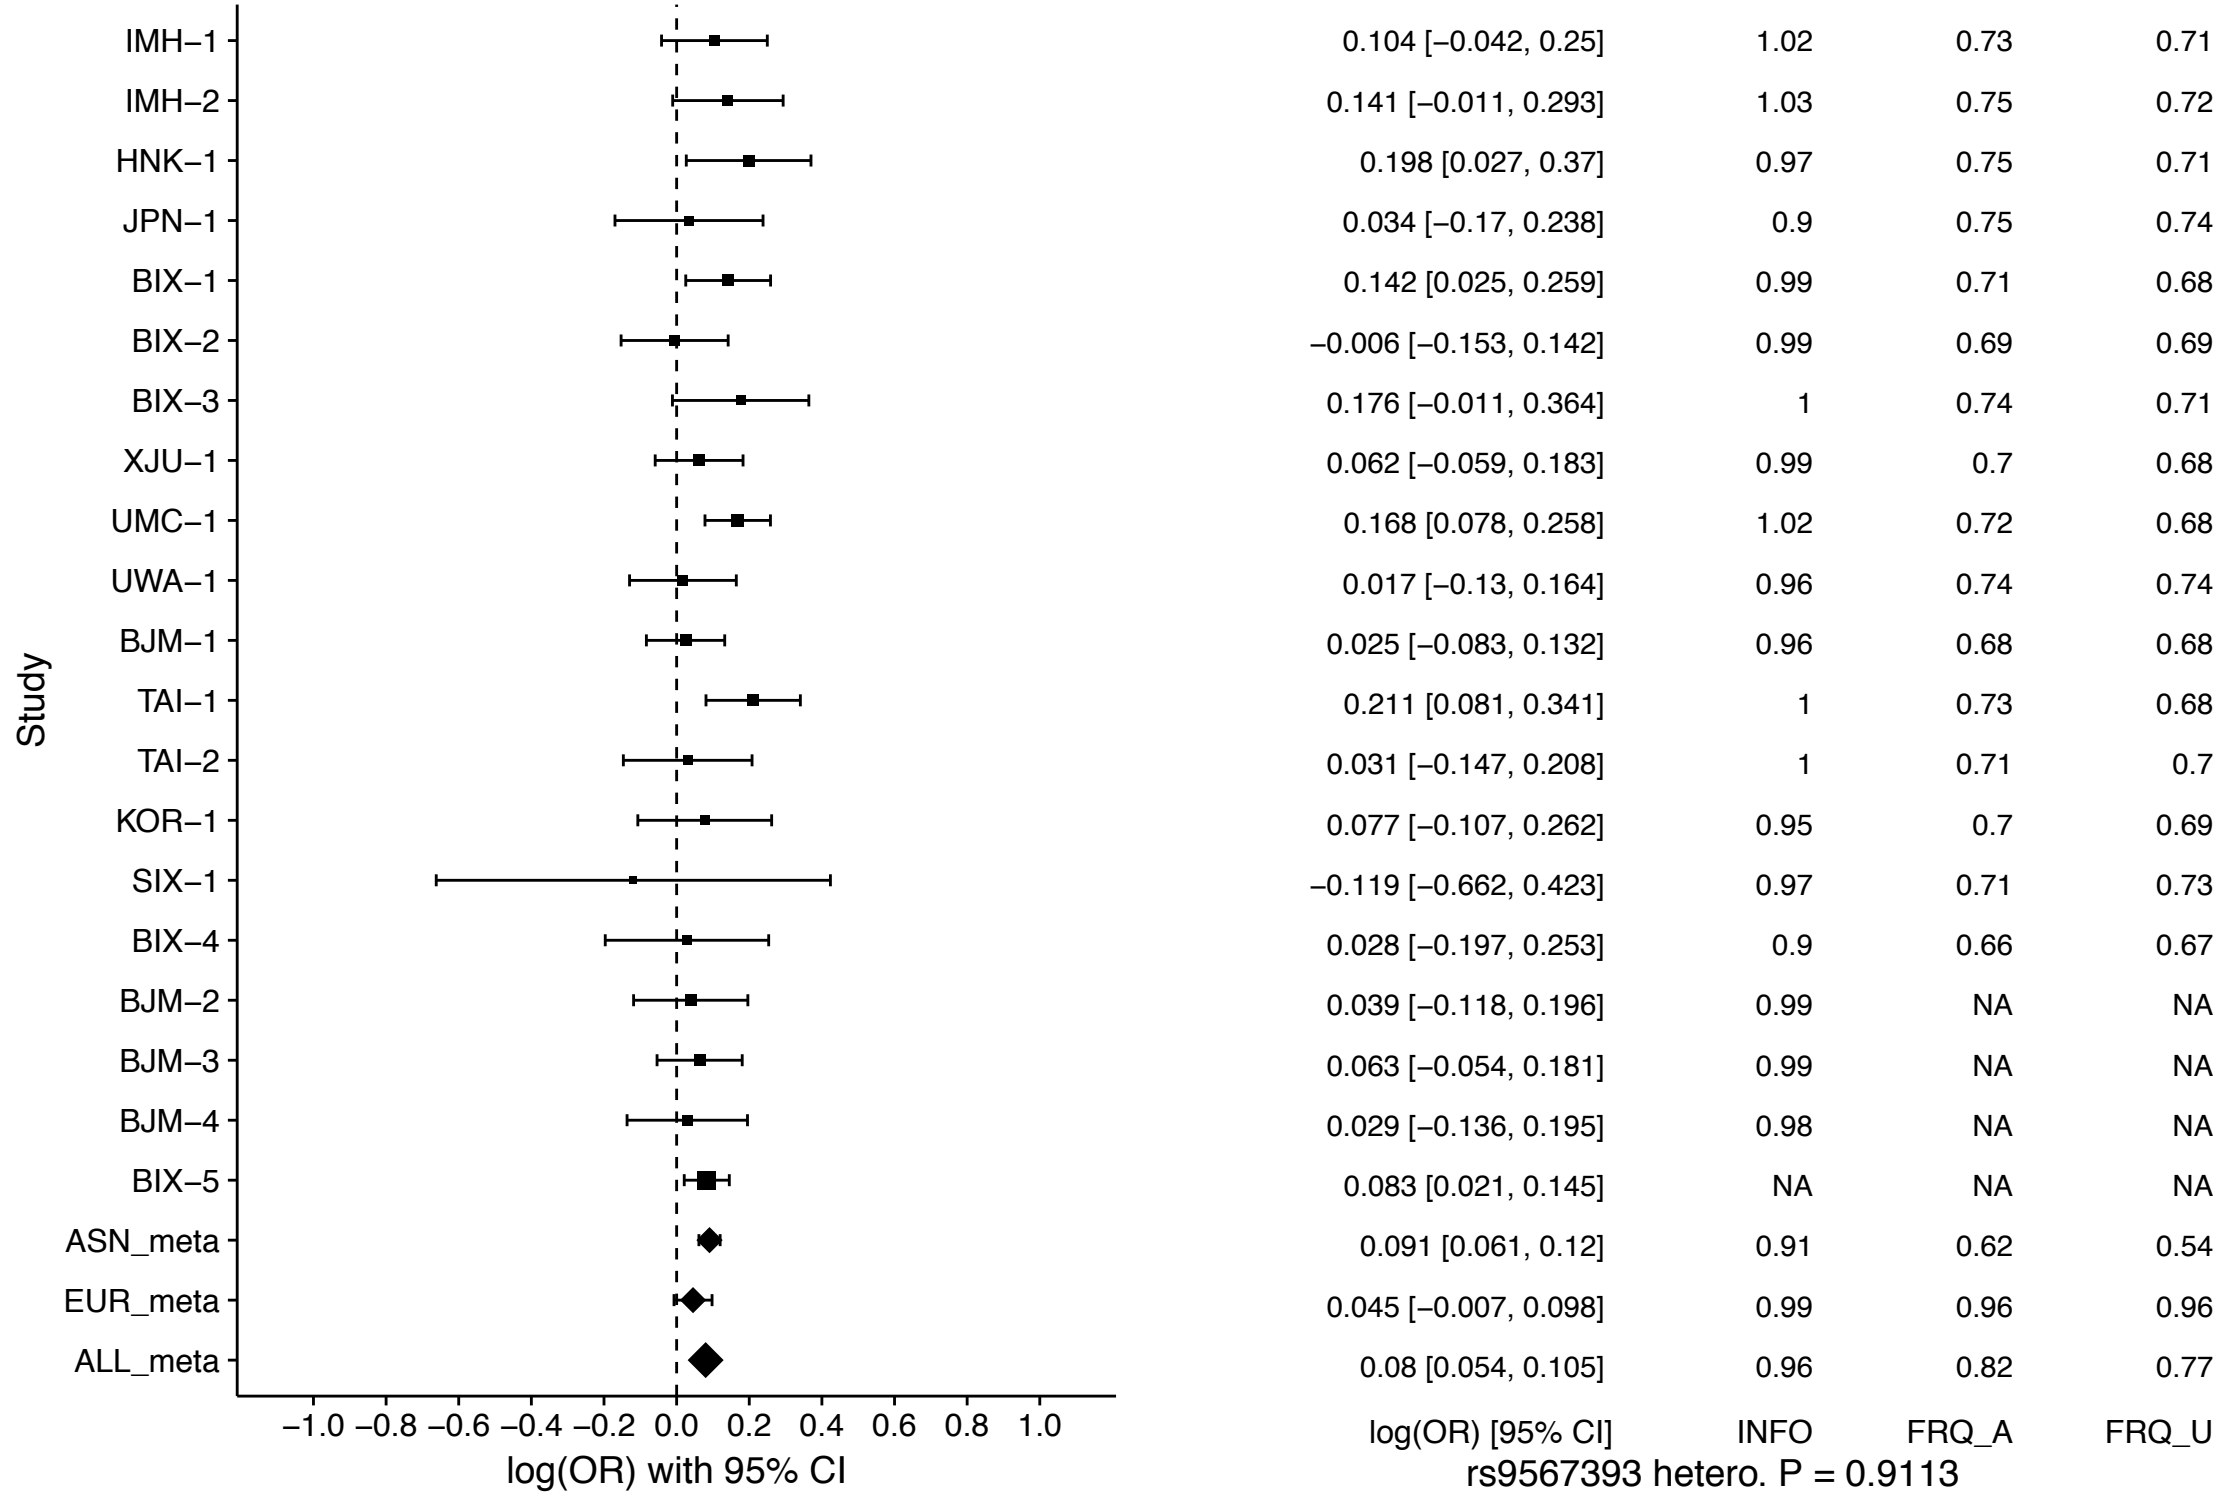

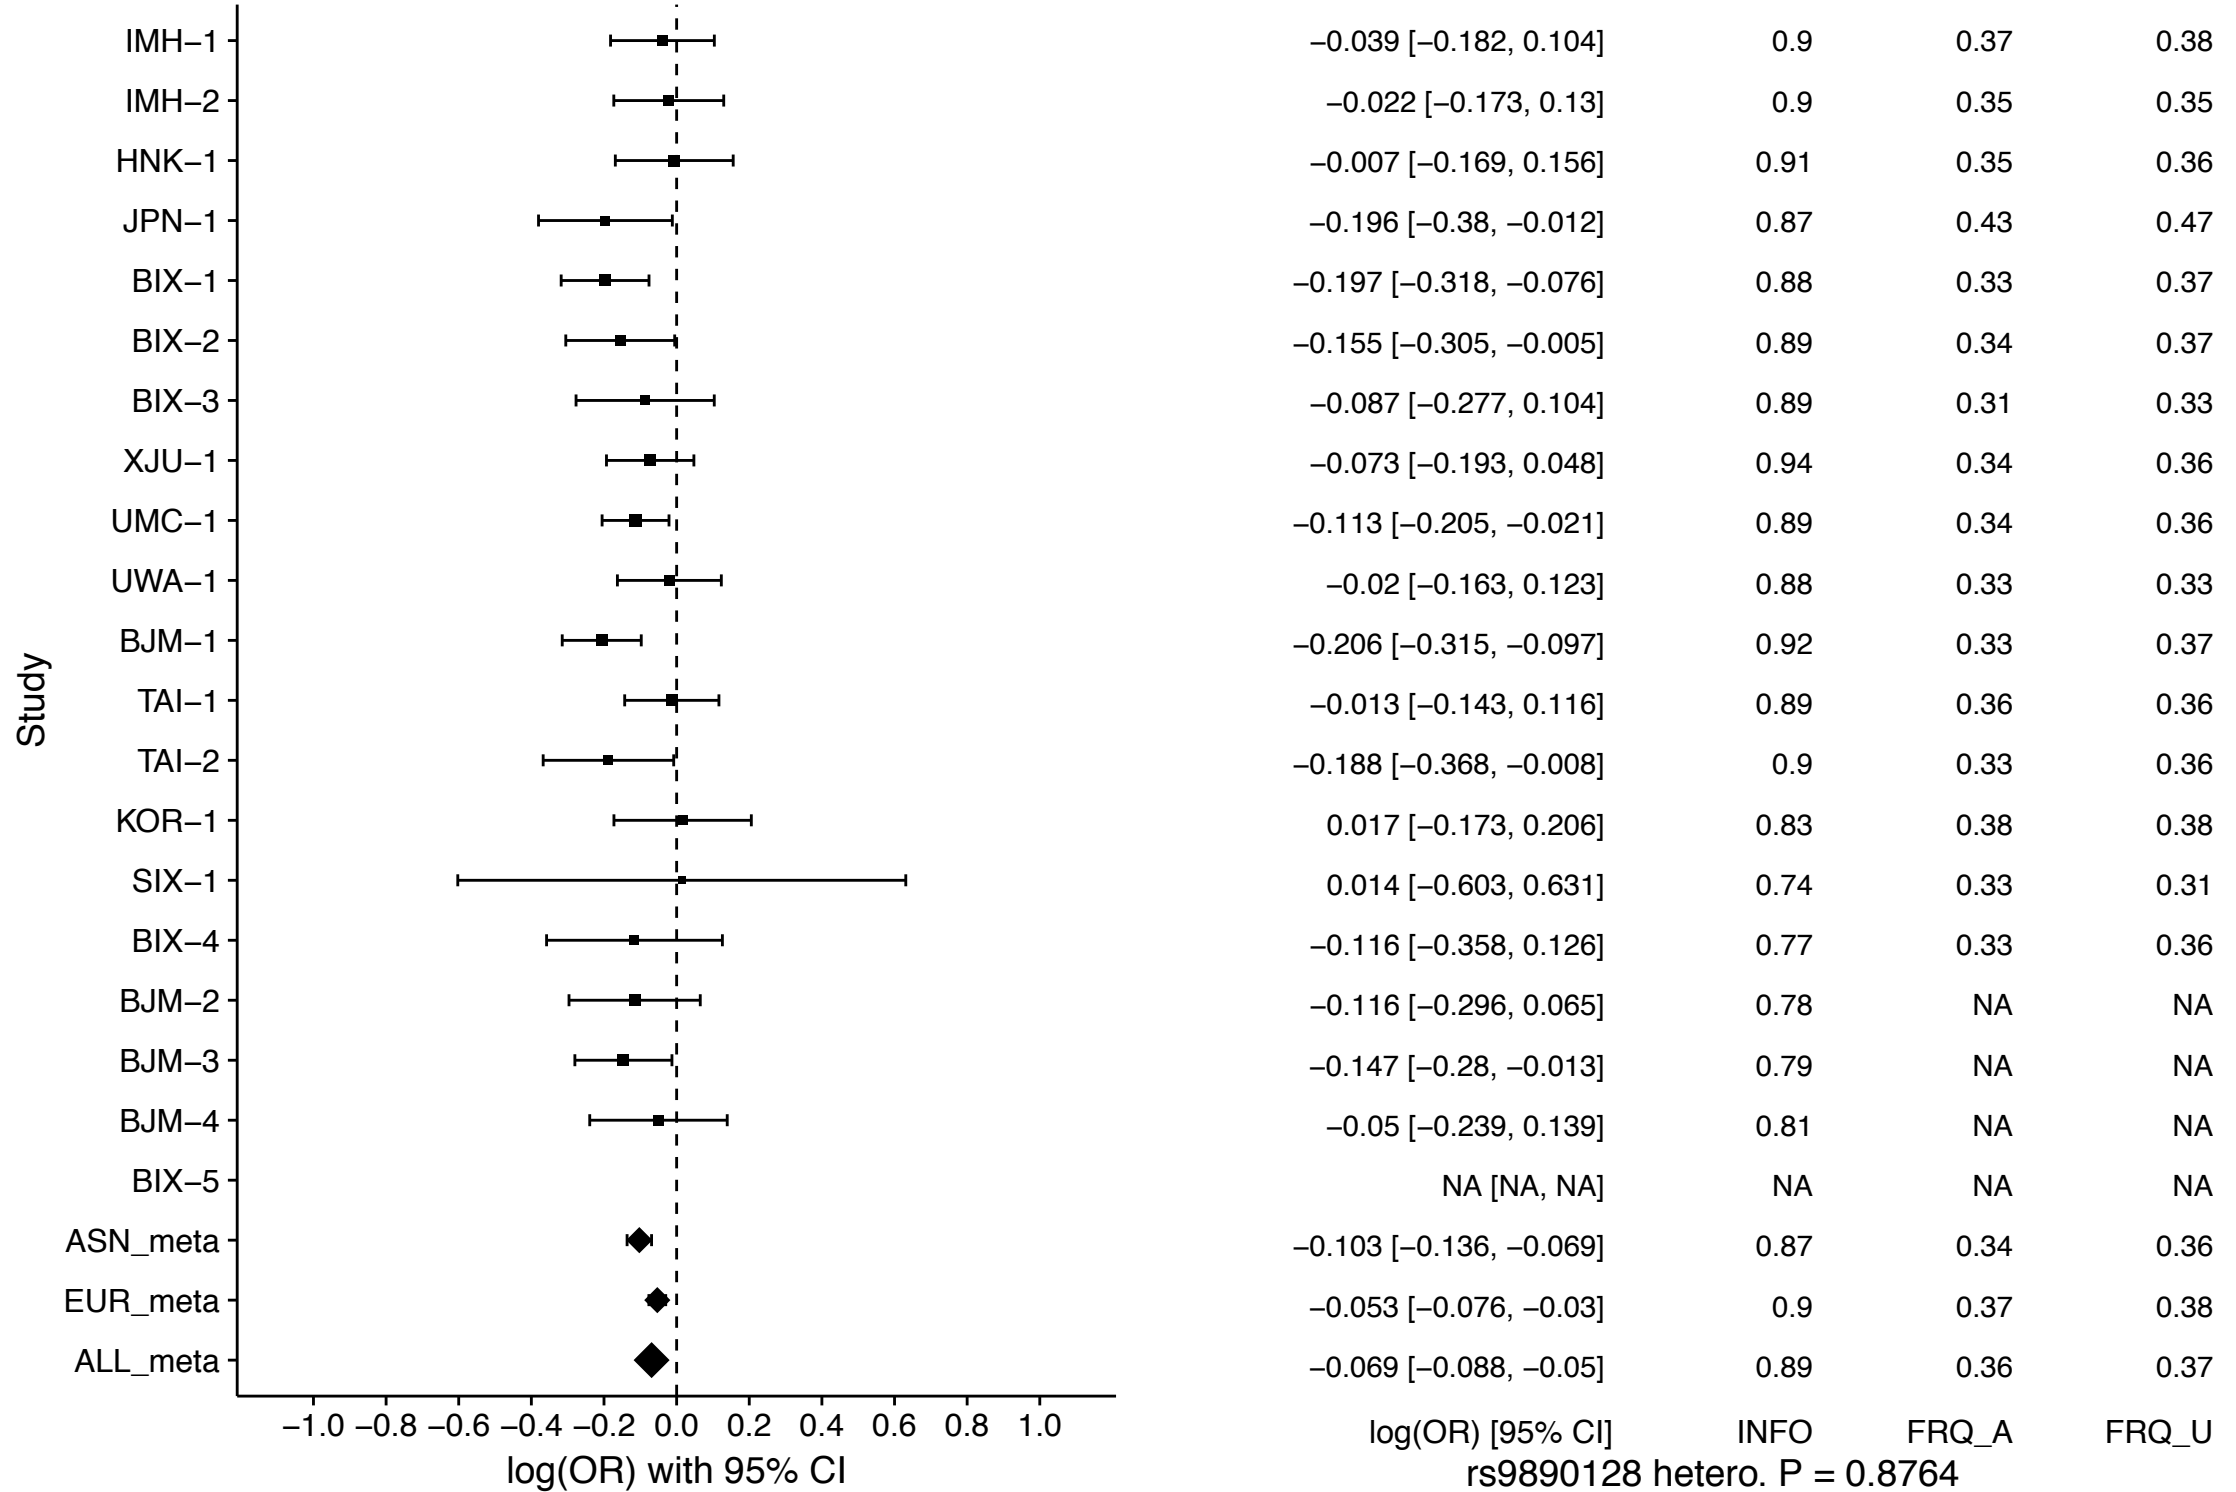

-1.0 -0.8 -0.6 -0.4 -0.2 0.0 0.2 0.4 0.6 0.8 1.0

log(OR) with 95% CI

log(OR) [95% CI] INFO FRQ\_A FRQ\_U

rs9890128 hetero. P = 0.8764

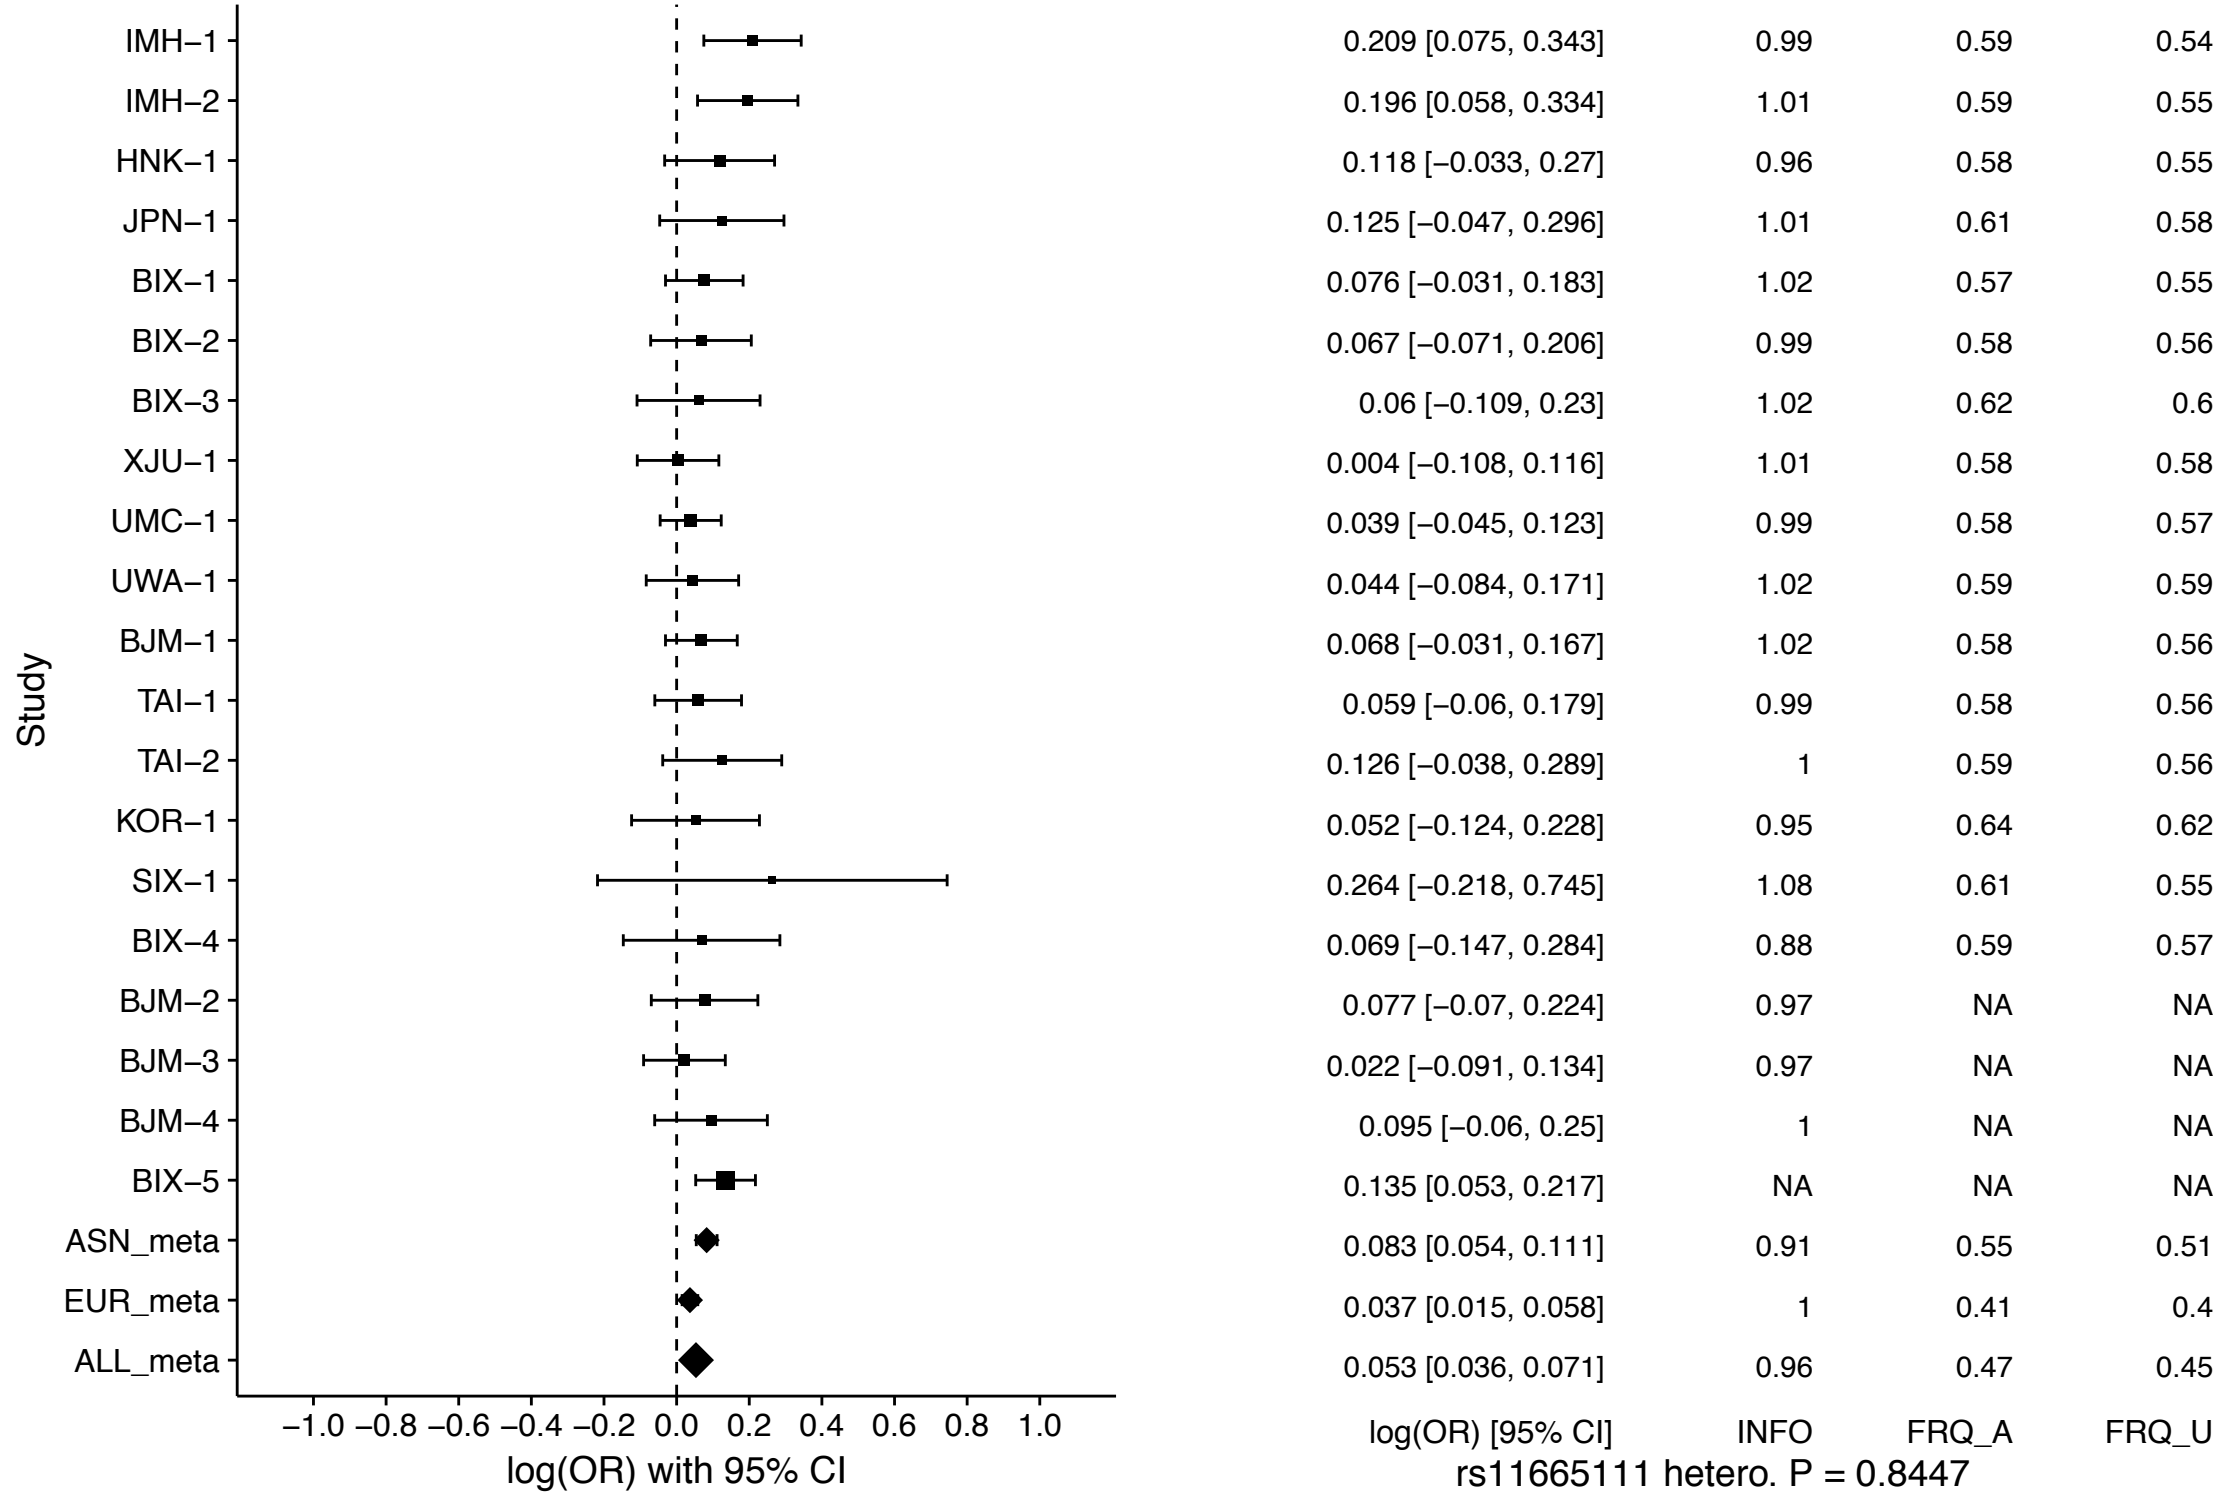

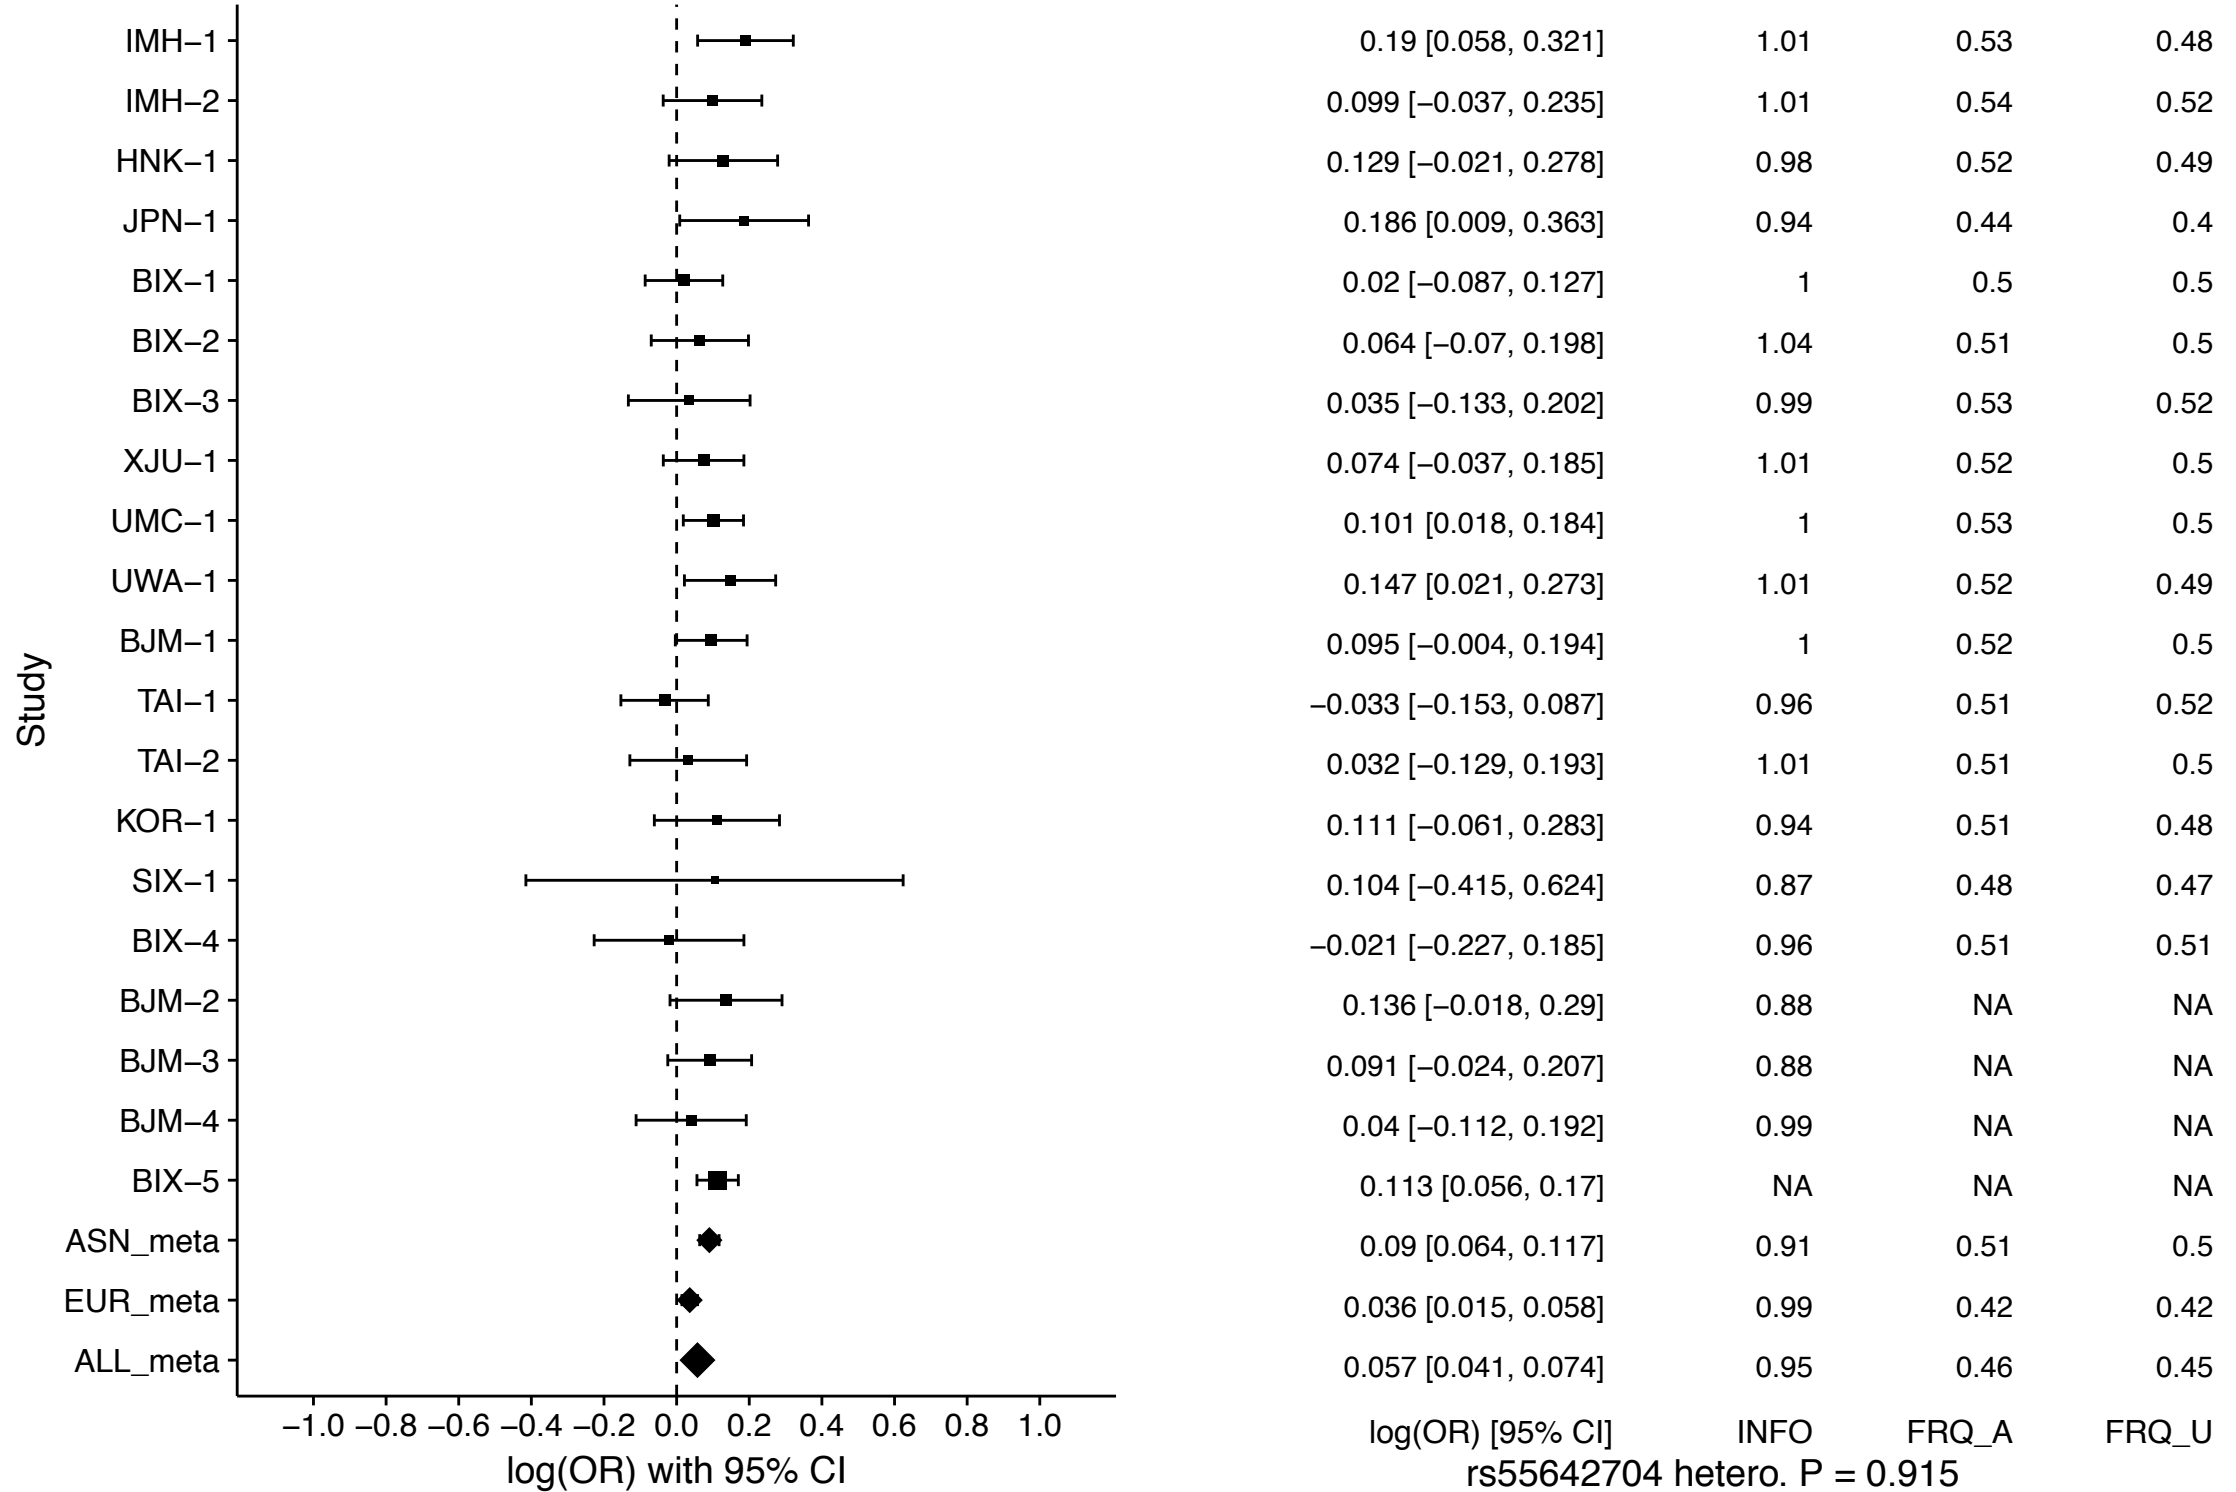

log(OR) [95% CI] INFO FRQ\_A FRQ\_U  
 rs55642704 hetero. P = 0.915
